# Supplementary material for: Biogeochemical response of the Mediterranean Sea tothe transient SRES–A2 climate change scenario
Source: Copernicus journal article supplement (doi:10.5194/bg-2018-208), 2018-05-24
Supplement: Supplementary file [file bg-2018-208-AC1-supplement.zip]

# Biogeochemical response of the Mediterranean Sea to the transient SRES–A2 climate change scenario

Camille Richon<sup>1,\*</sup>, Jean-Claude Dutay<sup>1</sup>, Laurent Bopp<sup>2</sup>, Briac Le Vu<sup>2</sup>, James C. Orr<sup>1</sup>, Samuel Somot<sup>3</sup>, and François Dulac<sup>1</sup>

<sup>1</sup>LSCE/IPSL, Laboratoire des Sciences du Climat et de l'Environnement, CEA-CNRS-UVSQ, Gif-sur-Yvette, France

<sup>2</sup>Laboratoire de Météorologie Dynamique, LMD/IPSL, Ecole Normale Supérieure - PSL Research Univ., CNRS, Sorbonne Université, Ecole Polytechnique, Paris, France

<sup>3</sup>CNRM UMR 3589, Météo-France/CNRS, Toulouse, France

\*Now at: Department of Earth, Ocean and Ecological Sciences, School of Environmental Sciences, University of Liverpool, Liverpool L69 3GP, UK

*Correspondence to:* Camille Richon (crichon@liverpool.ac.uk)

**Abstract.** The Mediterranean region is a climate change hot-spot. Increasing greenhouse gas emissions are projected to lead to a significant warming of Mediterranean Sea waters, as well as major changes in its circulation, but the subsequent effects of such changes on marine biogeochemistry are still poorly understood. Our aim is to investigate the changes in nutrient concentrations and biological productivity in response to climate change in the Mediterranean region. To do so, we perform transient simulations with the coupled high resolution model NEMOMED8/PISCES using the ~~pessimistic~~ high-emission IPCC SRES-A2 socio-economic scenario and corresponding Atlantic, Black Sea, and ~~coastal~~ riverine nutrient inputs. Our results indicate that nitrate is accumulating in the Mediterranean Sea over the 21st century, whereas no tendency is found for phosphorus. These contrasted variations result from an unbalanced nitrogen-to-phosphorus input from ~~external sources and lead to changes in phytoplankton nutrient limitation factors~~ fluxes through the Strait of Gibraltar and riverine discharge and lead an expansion of phosphorus-limited regions across the Mediterranean. In addition, phytoplankton net primary productivity is reduced by 10 % in the 2090s in comparison to the present state, with reductions of up to 50 % in some regions such as the Aegean Sea as a result of nutrient limitation and vertical stratification. We also perform sensitivity tests in order to study separately the effects of climate and biogeochemical input changes on the Mediterranean future state. This article is a first step in the study of transient climate change effects on the Mediterranean biogeochemistry, but calls for coordinated multi-model efforts to explore the various uncertainty sources of such a future projection.

## 20 1 Introduction

The Mediterranean basin is enclosed by three continents, with mountains, deserts, rivers, and industrialized cities. This area is known as one of the most oligotrophic marine environment in the world (Béthoux et al., 1998). Because of its high anthropogenic pressure and low biological productivity, this region is predicted to be highly sensitive to future climate change impacts (Giorgi, 2006; Giorgi and Lionello, 25 2008).

Records of the past evolution of the Mediterranean circulation show that the Mediterranean has undergone abrupt changes in its circulation patterns over ancient times. In particular, high stratification events, characterized by the preservation of organic matter in the sediment, known as sapropels, have been recorded ~~through the last several times through geological history. The most recent was~~

30 ~~recorded~~ 10 000 years ~~ago and lasted about 3 000 years~~. This accumulation of organic matter in the sediments is interpreted as the result of a strong stratification of the water column leading to suboxic deep layers (e.g. Rossignol-Strick et al., 1982; Rohling, 1991, 1994; Vadsaria et al., 2017).

In more recent times, abnormal winter conditions have led to changes in deep water formation, such as the Eastern Mediterranean Transient (EMT) event that occurred during the early nineties

35 ~~(see Theocharis et al., 1999; Lascaratos et al., 1999; Nittis et al., 2003; Velaoras and Lascaratos, 2010; Roether et al., 2014) and had biogeochemical impacts and had chemical impacts such as an increase in the Levantine basin salinity (see Theocharis et al., 1999; Lascaratos et al., 1999; Nittis et al., 2003; Velaoras and Lascaratos, 2010; Roether et al., 2014)~~

. Also, changes in the North Ionian Gyre circulation triggered the so-called Bimodal Oscillating System (BiOS) that ~~influencees~~ influenced phytoplankton bloom in the Ionian Sea ~~(Civitarese et al., 2010)~~

40 ~~–The through the~~ modification of water transport ~~that~~ led to modified nutrient distribution ~~that can alter local productivity and altered local productivity (Civitarese et al., 2010)~~. These events show that a semi-enclosed basin with short residence time of water ~~(around 100 years, see Robinson et al., 2001)~~ such as the Mediterranean is highly sensitive to climate conditions and that ~~changes in perturbations of~~ these conditions can ~~trigger important circulation changes~~ modify the circulation, ultimately leading

45 to changes in the biogeochemistry.

~~The Mediterranean is connected to the global ocean by the narrow Strait of Gibraltar through which transport contributes substantially to its water and nutrient budgets (e.g. Gómez, 2003; Huertas et al., 2012)~~

–Future climate projections with greenhouse gases high-emission scenarios yield an increase in temperature and a decrease in precipitation over the Mediterranean region (Giorgi, 2006; IPCC, 50 2012) leading to warmer and saltier seawater (Somot et al., 2006; Adloff et al., 2015). As a result of these changes, the Mediterranean thermohaline circulation (MTHC) may significantly change with a consistent weakening in the western basin ~~for greenhouse gases high-emission scenarios~~ and a less

certain response in the eastern basin in climate change scenarios characterized by high greenhouse gases emission (Somot et al., 2006; Adloff et al., 2015). In ~~one of these MTHC weakening scenarios,~~

55 ~~Herrmann et al. (2014) show, in addition, a vertical stratification increase (Adloff et al., 2015) all A2 runs, Adloff et al. (2015) show an increase in the stratification index at the end of the 21st century.~~

This will likely ~~lead to~~ weaken the vertical mixing ~~that finally and~~ may reduce nutrient supply in the upper layer of the Mediterranean that is essential for phytoplankton to bloom (d'Ortenzio and Ribera d'Alcalà, 2009; Herrmann et al., 2013; Auger et al., 2014).

60 Primary productivity in the ocean is influenced by water circulation and vertical mixing that ~~bring together available nutrients and brings available nutrients to~~ phytoplankton (Harley et al., 2006). Changes in oceanic physics such as modification of vertical mixing can have dramatic effects on plankton community dynamics and ultimately on the productivity of the entire oceanic food web (Klein et al., 2003; Civitarese et al., 2010). Few studies have investigated the sensitivity of the  
65 oligotrophic Mediterranean Sea to future climate change (e.g. Herrmann et al., 2014, for the northwestern Mediterranean). Lazzari et al. (2014) investigated the effects of the A1B SRES (Special Report on Emissions Scenarios) moderate climate change scenario on the Mediterranean biological productivity and plankton communities. They performed short (10-year) non-transient simulations at the beginning and the end of the 21st century and found a decreasing trend of phytoplankton biomass in response to  
70 this climate change scenario. Macias et al. (2015) simulated a "baseline" of expected consequences of climate change alone on the Mediterranean primary productivity. They found that according to the RCP 4.5 and RCP 8.5 scenarios, integrated primary productivity over the eastern Mediterranean basin may increase as a result of density changes (increased stratification isolating the upper layer from the rest of the water column). However, their results are based on non-transient simulations and  
75 present-day nutrient inputs~~and the~~. The response of the Mediterranean biogeochemistry to transient climate and biogeochemical change scenarios has never been evaluated.

Being a semi-enclosed oligotrophic basin, the Mediterranean is highly sensitive to external nutrient inputs. Their origins are mainly from coastal runoff, river discharge (Ludwig et al., 2009), Atlantic inputs through ~~Gibraltar (Gómez, 2003)~~the Strait of Gibraltar (Gómez, 2003; Huertas et al., 2012),

80 and atmospheric deposition (~~Richon et al., 2017, 2018~~). (see e.g. Dulac et al., 1989; Christodoulaki et al., 2013; Gallisai et al., 2014; . Recent studies also showed that direct wastewater discharge (Powley et al., 2016) and submarine groundwater (Rodellas et al., 2015) may be important sources of nutrient for the Mediterranean. However, these sources are to date not well quantified. This study aims at understanding the biogeochemical

response of the Mediterranean to a "business-as-usual" climate change scenario throughout the  
85 21st century. For this purpose, we use the high resolution coupled physical-biogeochemical model NEMOMED8/PISCES. We model the evolution of biogeochemical tracers (nutrients, chlorophyll-a ~~concentrations~~concentration, plankton biomass and primary production) under the SRES A2 climate change scenario for the 21st century (IPCC and Working Group III, 2000). The choice of the A2 scenario was driven by the availability of daily 3-D forcings for the biogeochemical model

90 (~~Adloff et al., 2015~~)(physical forcings such as ocean currents, temperature and salinity, see Adloff et al., 2015). We are aware that using a single simulation will limit the robustness of our results. However the computer power required to perform large ensembles with PISCES and the unavailability of 3-D daily ocean transient scenario data currently prevent a more extensive assessment.

This article is organized as follows: the coupled model, forcings and the different simulations are first described. We briefly evaluate the biogeochemical model in Section 3.1 and present the evolution of the physical and biogeochemical forcings in Section 3.2. In section 3.3, we expose the temporal evolution of the main nutrients, their budgets in present and future conditions and discuss their impact on the biogeochemistry of the Mediterranean Sea [in section 4](#).

## 2 Methods

### 2.1 The ocean model

The oceanic general circulation model used in this study is NEMO (Madec, 2008) in its regional configuration for the Mediterranean Sea (NEMOMED8 Beuvier et al., 2010). The NEMOMED8 grid has a horizontal resolution of  $1/8^\circ$  stretched in latitude (i.e., with a resolution from 9 km in the North to 12 km in the South of the domain). The model has 43 vertical levels with varying thicknesses (from 6 m in the surface layer to 200 m in the deepest layer). The Atlantic boundary is closed at  $11^\circ\text{W}$  and tracers are introduced in a buffer zone between  $11^\circ\text{W}$  and  $6^\circ\text{W}$ .

Air–sea fluxes (momentum, heat, water) and river discharges used to force NEMOMED8 are prescribed by the atmospheric Regional Climate Model ARPEGE–Climate (Déqué et al., 1994; Gibelin and Déqué, 2003) using a global and stretched grid, which has a 50–km horizontal resolution over the area of interest.

### 2.2 The SRES–A2 scenario simulation

ARPEGE–Climate is itself driven by greenhouse gases (GHG) and aerosol forcings following the observations (up to year 2000) and the SRES–A2 scenario afterwards and by SST ([Sea Surface Temperature](#)) coming from a previously run CNRM–CM coupled GCM (General Circulation Model) simulation (Royer et al., 2002). In addition, the ocean component of CNRM–CM (a low resolution NEMO version) provides the near–Atlantic conditions (3–D potential temperature and salinity) for NEMOMED8. The various forcings and the modeling chain from the GCM to the ocean regional model are described in details in Somot et al. (2006) and Adloff et al. (2015).

The NEMOMED8 simulation (ocean physics and forcings) used here corresponds to one of the simulations used and studied in Adloff et al. (2015), and more specifically the simulations labeled HIS (historical period 1961 to 1999) and A2 (A2 scenario period 2000–2099) in their Table 1. This physical run has already been used to study climate change impacts on Mediterranean marine ecosystems (Jordà et al., 2012; Hattab et al., 2014; Albouy et al., 2015; Andreello et al., 2015).

The main changes on the Mediterranean Sea physics (SST, SSS [Sea Surface Salinity](#), surface circulation, deep convection and thermohaline circulation, vertical stratification, sea level) ~~that~~ are detailed in Adloff et al. (2015). Briefly, changes in temperature and precipitation in the A2 scenario lead to increased evaporation in the basin. Freshwater inputs from rivers and the Black Sea decrease

along with total precipitation. This consequently leads to a significant increase in ~~Gibraltar-net~~  
~~transport-net transport through the Strait of Gibraltar~~ (+0.018 Sv). Temperature and salinity increase  
130 strongly, leading to a decrease in surface density and an overall increase in vertical stratification.  
Average sea surface temperature of the Mediterranean rises by up to 3 ~~K°C~~ by the end of the century.  
However, the temperature rise is not homogeneous in the basin, regions such as the Balearic, Aegean,  
Levantine and North Ionian undergo a more intense warming (over 3.4 ~~K°C~~) probably due to the  
addition of the atmosphere-originated quasi-homogeneous warming with the local effect of surface  
135 current changes. The salinity increases by 0.5 (practical salinity ~~sealeunits~~) on average across the  
basin.

In the A2 simulation, the entire Mediterranean basin is projected to become more stratified by 2100  
and deep water formation is generally reduced. These variations in hydrological characteristics of the  
water masses generate important changes in the circulation and in particular in the vertical mixing  
140 intensity. The strong reduction in vertical mixing observed in all deep water formation areas of the  
basin is linked with the changes in salinity and temperature of the water masses. ~~Reduced-vertical~~  
~~mixing may also reduce nutrient supply to the surface waters. A reduction in deep convection may~~  
~~also tend to reduce the loss of P and N to the sediment.~~

## 2.3 The biogeochemical model

145 Here, the physical model NEMOMED8 is coupled to the biogeochemical model PISCES (Aumont  
and Bopp, 2006), already used for investigations in the Mediterranean basin (Richon et al., 2017,  
2018). This Monod-type model (Monod, 1958) has 24 biogeochemical compartments including 2  
phytoplankton (nanophytoplankton and diatoms) and 2 zooplankton size classes (microzooplankton  
and mesozooplankton). Phytoplankton growth is limited by the external concentration of five different  
150 nutrients: nitrate, ammonium, phosphate, silicic acid and iron. In this version of PISCES, elemental  
ratios of C:N:P in the organic matter are fixed to 122:16:1 following Takahashi et al. (1985). There  
is no explicit bacterial compartment but bacterial biomass is calculated using zooplankton biomass  
(see Aumont and Bopp, 2006, for details). Organic matter is divided in 2 forms: dissolved organic  
carbon (DOC) and particulate organic carbon. The biogeochemical model is ran in offline mode  
155 (see e.g. Palmieri et al., 2015): biogeochemical quantities are passive tracers, they are transported  
following an advection–diffusion equation using dynamical fields (velocities, mixing coefficients...)   
calculated beforehand in a separate simulation with only the dynamical model NEMOMED8.

## 2.4 Boundary and initial physical and biogeochemical conditions

External nutrient supply for the biogeochemical model include inputs from the Atlantic Ocean and  
160 from Mediterranean rivers. We did not include atmospheric deposition as there is currently no  
scenario for its future evolution. Similarly, we did not include submarine groundwater discharge  
and direct wastewater discharge as there is to date no climatology for these sources. Atlantic input

is prescribed from water exchange ~~at~~ through the Strait of Gibraltar in the NEMO circulation model along with the concentrations of biogeochemical tracers in the buffer zone. Nutrient concentrations in the buffer zone are prescribed from a global ocean climate projection using the A2 simulation values from IPSL–CM5–LR (Dufresne et al., 2013) performed within the framework of the CMIP5 project (Taylor et al., 2012). Nutrient concentrations in the buffer–zone are relaxed to these values with a time constant of one month.

Nutrients input from rivers are derived from ~~Ludwig et al. (2009) before 2000.~~ Ludwig et al. (2010) before 2000, Dissolved inorganic carbon (DIC) and Si are derived from Ludwig et al. (2009). For the 21st century, we use the estimations for nutrient discharge proposed by Ludwig et al. (2010) of the "~~Business-As-Usual~~Order from Strength" scenario from the Millenium Ecosystem Assessment (MEA) (Cork et al., 2005), which gives nitrate and phosphate discharge per sub–basin in 2030 and 2050. Yearly values are obtained by linear interpolation between 2000 and 2030 and between 2030 and 2050, after which they are held constant until the end of the simulation in 2100. Seasonal variability coming from ~~the four~~ four of the largest rivers for Mediterranean and Black Sea (Rhône, Po, Ebro and Danube) is also included. According to Ludwig et al. (2010), the future trends in nutrient discharge from the major rivers of the Mediterranean stay within the interannual variability over the past 40 years. ~~However, if the riverine nutrient input is not drastically changed at the basin~~  
~~scale,~~ This scenario is based on hypotheses of very little efforts made towards mitigation of climate change. Ludwig et al. (2010) point out some substantial changes in the nutrient and water budget in specific regions. However, total riverine nutrient input is not drastically changed at the basin scale. In particular, according to their scenario, the northern part of the Mediterranean has decreasing trends in nitrate discharge whereas it is increasing in the southeastern Levantine. Freshwater discharge from Ludwig et al. (2010) is based on the SESAME model reconstruction and differs from the ARPEGE–Climate model used here. This may lead to ~~ineoherencies~~ incoherences between water and nutrient discharges, but the nutrient discharges from Ludwig et al. (2010) are the only available values, and the SESAME model is not coupled with NEMO/PISCES. Adloff et al. (2015) evaluate the changes in total freshwater runoff in the HIS/A2 simulation. Their Table 2 shows that the total freshwater runoff to the Mediterranean is lower than the Ludwig et al. (2009) estimate (by about 30 %). They found approximately 27 % decrease in total runoff by the end of the 21st century. This trend is consistent with the deceasing trend found by Ludwig et al. (2010). However, the 2050 estimates of freshwater runoff from Ludwig et al. (2010) are only 13 % lower than the 1970 and 2000 estimates. The freshwater runoff decrease in the physical model is more important than in the nutrient runoff model. This may result in higher nutrient concentrations at the river mouth. We are also aware that the future evolution of river discharges into the Mediterranean Sea is highly uncertain and depends at least on the scenario choice and on the model and modelling strategy choice (Sanchez-Gomez et al., 2009; Dubois et al., 2012; Adloff et al., 2015). However, nutrients from river discharge are consumed rapidly at proximity of the river mouth and we believe these potential higher

200 concentrations don't have a large impact of the results.

Initial nutrient concentrations in the Mediterranean come from the SeaDataNet database (Schaap and Lowry, 2010) and initial nutrient concentrations in the buffer zone are prescribed from the World Ocean Atlas (WOA) (Locarnini et al., 2006). Salinity and temperature are initialized from the MEDATLAS II climatology of Fichaut et al. (2003).

205 All simulations begin from a restart of a historical run starting in January 1965 following a spin-up of more than 115 years done with a loop of the period 1966 to 1981 for the physical forcings and the river nutrient discharge.

## 2.5 Simulation set-up

All simulations are performed for 120 years(~~from 1980 to 2100~~). The control run CTRL is performed  
210 with ~~present-day conditions forcing~~ (forcing conditions corresponding to the 1966–1981 ~~)-period~~  
looped over the simulation period. This period was chosen in order to avoid including in the CTRL  
years with too important warming such as the 1980s and 1990s. The scenario simulation is referred  
to as HIS/A2 as in Adloff et al. (2015). HIS is the name of the historical period (in our case between  
1980 and 1999), and A2 is the name of the 2000–2099 scenario simulation.

215 In order to quantify separately the effects of climate and biogeochemical ~~forcings~~changes, we performed  
2 additional control simulations: CTRL\_R with climatic and Atlantic conditions corresponding to  
present-day conditions and river nutrient discharge following the scenario evolution, and CTRL\_RG  
with climatic conditions corresponding to present-day conditions, and river nutrient discharge and  
Atlantic buffer-zone concentrations following the scenario conditions. Table 1 describes the different  
220 simulations. The effects of ~~external-nutrient-inputs~~ nutrient inputs from exchanges through the Strait  
of Gibraltar and riverine discharge independent of climate effect are derived by CTRL\_R-CTRL\_R  
minus CTRL and CTRL\_RG-CTRL\_RG minus CTRL\_R. Similarly, to derive the effects of climate  
change and nutrient input change on nutrient budgets, we use the difference between HIS/A2 and  
CTRL. To derive the effects of climate change only, we calculate the difference between HIS/A2 and  
225 CTRL\_RG.

## 3 Results

### 3.1 Evaluation of the NEMOMED8/PISCES model

NEMOMED8 has already been used in a number of regional Mediterranean Sea modeling studies  
either in hindcast mode (Beuvier et al., 2010; Herrmann et al., 2010; Sevault et al., 2014; Soto-  
230 Navarro et al., 2015; Dunić et al., 2016) or scenario mode (Adloff et al., 2015). It produces the main  
characteristics of the Mediterranean Sea circulation. Evaluation of the HIS simulation provided in  
Adloff et al. (2015) shows that the main physical characteristics of the Mediterranean are produced,  
in spite of a too cold upper layer (~~1-K~~°C colder than observations) and too little stratification in



comparison to observations. In particular, the HIS simulation matches closely the observed thermohaline circulation in the Adriatic and Ionian basins (see Adloff et al., 2015).

The regional NEMOMED physical model has already been coupled to the biogeochemical model PISCES on a  $1/12^\circ$  grid horizontal resolution (Palmieri et al., 2015; Richon et al., 2017, 2018), but no future climate simulation has yet been performed. As a first study coupling NEMOMED8 with PISCES, we compared the main biogeochemical features of our ~~control-simulation~~ simulations

with available data. Figure 1 shows the surface average chlorophyll concentrations in the top 10 meters of the CTRL and HIS/A2 simulations, and from ~~satellites-estimations~~ satellite estimations from MyOcean Dataset (<http://marine.copernicus.eu>). All chlorophyll values in the article and the data are chlorophyll-a. The model correctly reproduces the main high-chlorophyll regions such as the Gulf of Lions and coastal areas. However, Figure 1 shows an underestimation of about 50 %

of the surface chlorophyll concentrations by the model in these productive areas. The west-to-east gradient of productivity is also reproduced by the model with values that agree with satellite estimates. Moreover, this Figure shows that chlorophyll produced by the CTRL is stable over time. The model fails, however, to reproduce the observed chlorophyll-rich areas in the Gulf of Gabes and at the mouth of the Nile. ~~Even though the satellite estimates are uncertain in the coastal areas,~~

~~the model seems to underestimate chlorophyll concentrations in those regions.~~ This discrepancy is probably linked with insufficient simulated nutrient discharge from coastal runoff in these regions.

Moreover, several studies (see e.g. Claustre et al., 2002; Morel and Gentili, 2009) show that satellite estimates have a systematic positive bias in the coastal regions because of the high concentrations of colored dissolved organic matter and the presence of dust particles in seawater back scattering

light. Figure 2 provides an evaluation of the average chlorophyll surface concentration evolution over the entire basin for the period 1997–2005. This Figure shows that the normalized chlorophyll surface concentration in the model is close to the estimates provided by the SeaWiFs satellite data (Bosc et al., 2004). Even though the interannual variability of the model is 50 % smaller than in the satellite product, the model captures the increase in chlorophyll concentration between 2002 and

2005 (approximately 15 % of increase in the model and 30 % in the satellite data). The evaluation of the model against 2 independent datasets shows that the model yields satisfying estimates of surface chlorophyll.

The vertical distribution of nitrate and phosphate over a section crossing the Mediterranean from East to West as well as chlorophyll and nutrient concentration profiles at the DYFAMED station are shown in appendix (Figures A1 and A3). These figures show that the model produces some seasonal and interannual variability of the nutricline depth and intensity. However, the nutricline depth and DCM depth are consistently overestimated by the model in comparison to the data. The nutricline intensities seem to be underestimated by about 50 % and the depth is overestimated. However, nutricline depth deepens from 100–120 m to 180–200 m between the western and the eastern basins (see Figure A3).



In spite of some underestimation of nutrient concentrations that are probably linked with the features of the simulated intermediate and deep waters characteristics, the PISCES model reproduces the main characteristics of the Mediterranean biogeochemistry, including a salient west-to-east gradient in nutrient concentrations, low surface nutrient concentrations and a deep chlorophyll maximum (DCM). The average chlorophyll concentration observed at the DYFAMED station in the top 200 m is  $227-233 \pm 136$   $10^{-9} \text{ g L}^{-1}$  (average over the 1991–2005 period), while the model value for the HISperiod-is-173/A2 simulation over the same period is  $159 \pm 150$   $10^{-9} \text{ g L}^{-1}$ . These performances lend credence to our efforts to investigate the evolution of the Mediterranean biogeochemistry under the A2 climate change scenario with the same modeling platform.

### 3.2 Evolution of temperature and salinity

Average surface temperature and salinity (SST and SSS) evolution in the entire basin during the CTRL and HIS/A2 simulations are shown in Figure 3, which confirms results from Adloff et al. (2015) and shows that the CTRL simulation is stable over time. Beyond this ~~global-basin-wide~~ average variation in SST and SSS, a more detailed analysis reveals much greater variability depending on the region (Somot et al., 2006; Adloff et al., 2015). For instance, the Balearic Sea is more sensitive to warming than the rest of the western basin, and the eastern basin has a more intense warming than the western basin (up to 3°C warming in the eastern basin and in the Balearic Sea). Also, the surface salinity in the Aegean Sea increases more than the other regions.

### 3.3 Evolution of the nutrient budgets in the Mediterranean Sea

The nutrient budgets of the semi-enclosed Mediterranean basin are highly dependent on external sources (e.g. Ludwig et al., 2009, 2010; Huertas et al., 2012; Christodoulaki et al., 2013). In order to map the effects of climate change on the Mediterranean nutrient balance, we calculated mass budgets of inorganic nitrate and phosphate during the simulated period. These budgets take into account changes in Atlantic input, river discharge and sedimentation. Nitrate can also accumulate in the Mediterranean waters through  $\text{N}_2$  fixation by cyanobacteria, but this process accounts for less than 1 % of the total nitrate budget (Ibello et al., 2010; Bonnet et al., 2011; Yogeve et al., 2011), and is neglected here.

In this Section, we refer to the period 1980-1999 as the beginning of the century, to the period 2030–2049 as the middle of the century and to the period 2080–2099 as the end of the century. Also, we derive the effects of river input changes as the difference of nutrient concentrations between CTRL\_R and CTRL over these time periods. Similarly, the effects of changes in ~~Gibraltar-exchange~~ nutrient fluxes through the Strait of Gibraltar are derived by the differences between CTRL\_RG and CTRL\_R, and the effects of climate change by the difference between HIS/A2 and CTRL\_RG.

### 3.3.1 ~~Evolution of phosphate~~ Phosphate and nitrate concentrations budgets under climate and biogeochemical changes in the Mediterranean

In order to observe the general evolution of tracer concentrations over the 21st century, we plotted the evolution of the main limiting nutrients (Tables 2 and 3 summarize the average phosphate and nitrate ) concentrations for the entire simulation period in the western and eastern basins. The separation between western and eastern basin is the Sicily Strait. Therefore, the eastern basin includes the Ionian, Levantine, Adriatic and Aegean basins. Figure 7 shows the evolution of average phosphate concentrations in the western and eastern basin, respectively, for the surface (0–200 m), intermediate (200–600 m) and bottom (> 600 m) layers of the water column. content in all simulations for the 3 time periods described earlier.

~~We observe that phosphate concentration in~~ Phosphate content in the entire Mediterranean has increased in our simulation by 6 % over the 21st century, as determined by the difference between CTRL and HIS/A2 decreases in the surface and intermediate layers of simulations between 1980–1999 and 2080–2099. The increase is more important in the eastern basin than in the ~~western basin until the middle~~ western basin. In particular, we observe an 8 % increase in phosphate content in the Ionian–Levantine sub-basin in 2080–2099 compared to 1980–1999. The effects of phosphate river input changes are substantial over the first half of the century ~~and then increases again until the end of the century~~. Figure 7a shows that phosphate concentrations in the CTRL\_RG simulation differ significantly from those in CTRL at the end of the 21st century. This is a sign that phosphate concentration in the western basin is strongly linked to Gibraltar inputs. However, the concentrations in the CTRL\_RG simulation do not differ significantly from the CTRL simulation in the intermediate layer (Figure 7b). Nutrients enter the Mediterranean at Gibraltar through the surface layer and leave through intermediate and deep waters. ~~A slight accumulation of~~. We observe 3 % decrease in phosphate is observed in the deep western basin. The significant difference between the HIS/A2 simulation and the control runs shows that the evolution of the Mediterranean physics linked with climate change is primarily responsible for the changes in phosphate concentration in the intermediate ~~and deep western basin~~ content in the entire Mediterranean between 1980–1999 and 2030–2049 due to river input changes (difference between CTRL\_R and CTRL). Changes in phosphate fluxes ~~thought the Strait of Gibraltar seem to have limited effect on the global Mediterranean phosphate content~~. However, climate change effects lead to a global enhancement of 10 % in phosphate content in 2080–2099 in comparison to 1980–1999. This result shows contrasted effects of physical and biogeochemical conditions on the evolution of nutrient concentrations.

~~The eastern part of the basin contains approximately 50 % less phosphate than the western part. In the surface layer, phosphate concentration decreases in the beginning of the simulation and remain low during~~

Table 3 shows that in the model, the combined effects of climate, riverine and Atlantic nutrients input

changes over the 21st century (Figure 7d). We observe in Figures 7e and 7f a slight accumulation of phosphate in the intermediate and deep layers and large decennial variability of phosphate concentration in the deep eastern basin. The evolution of nitrate concentration shows a marked accumulation over the century in all regions of the intermediate and deep Mediterranean waters (Figures 8b, 8c, 8e and 8f). In the surface waters of the western basin, nitrate concentrations are stable until the middle of the 21st century, and then sharply increase until the end, lead to a 17 % increase in nitrate content over the Mediterranean in the 2080–2099 period compared to 1980–1999 (derived from the calculation of HIS/A2–CTRL). Changes in river discharge in the Mediterranean over the century lead to 9 % enhancement of nitrate content by the end of the century (2080–2099) compared to the beginning of the simulation period. This evolution follows nitrate inputs from the Atlantic. Nutrient dynamics in the surface western basin seem mainly dependent on Gibraltar exchanges. In the eastern basin, the impacts of river discharges of nitrate seem to have large influence on the nitrate accumulation as shown by the similar evolution of HIS/A2 and CTRL\_R simulations. (1980–1999). The most important effects of river input changes are observed in the Adriatic basin (over 50 % nitrate accumulation by the end of the century). Over the entire Mediterranean, the effects of changes in the fluxes through the Strait of Gibraltar on nitrate content are weak ( $< 1\%$ ). However, the evolution of physical conditions seems to have similarly large impacts on the nitrate concentrations in the eastern basin as shown by the difference between CTRL\_R and HIS/A2. The large differences between the CTRL simulations and the HIS/A2 shows that modification of circulation resulting from climate change have substantial impacts on the deep and intermediate nutrient concentrations. Figure 8d shows the contrasted effects of climate and biogeochemical changes. The strong difference between CTRL\_R and CTRL concentrations at the beginning of the simulation indicates that riverine nutrient discharge has a strong influence on surface nitrate concentrations in the eastern basin. But the strong difference between comparison of nitrate content in CTRL\_R and CTRL\_RG in the western basin shows a 3 % decrease in nitrate content in the western basin during the 2030–2049 period followed by an increase resulting in +1 % nitrate by 2080–2099 compared to the 1980–1999 period. Finally, climate change effects lead to 7 % increase in nitrate content over the Mediterranean basin in the 2080–2099 period compared to 1980–1999 (computed by HIS/A2 at the end of the century indicates that vertical stratification leads to a decrease in surface layer nitrate concentrations, probably linked with nutrient exhaustion. In the intermediate and deep layers of the eastern basin (Figures 8e and 8f), nitrate concentrations increase as a result of the effects of both climate and river discharge changes. In contrast, the difference between HIS/A2 and CTRL\_RG phosphate concentrations (Figure 7) indicates that the variations of phosphate concentrations during the A2–CTRL\_RG). These results indicate that river inputs and climate change are the main drivers of nitrate content changes in the Mediterranean basin over the 21st century are primarily linked with climate change.

### 3.3.2 ~~Exchange fluxes~~ Fluxes of nutrients ~~at~~ through the Strait of Gibraltar

The Mediterranean is connected to the global ocean by the narrow Strait of Gibraltar. Water masses  
380 transport through this strait contributes substantially to its water and nutrient budgets (e.g. Gómez, 2003; Huertas et al., 2012)  
. The Mediterranean is a remineralization basin that has net negative fluxes of inorganic nutrients (i.e.  
organic nutrients enter the basin through the Gibraltar Strait surface waters and inorganic nutrient  
leave the Mediterranean through the deep waters of the Gibraltar Strait Huertas et al., 2012). Figure 4  
shows the evolution of incoming and outgoing nitrate and phosphate fluxes through the Strait of  
385 Gibraltar in the HIS/A2 and in the CTRL simulations. We observe similar trends in phosphate and  
nitrate fluxes in the model. This is linked to the Redfieldian behavior of the primary production  
in PISCES. According to the HIS/A2 simulation, the incoming fluxes ~~decrease slightly of~~ nitrate  
and phosphate decrease slightly (from 50 to 35 Gmol month<sup>-1</sup> for nitrate and from 2.5 to 1.55  
Gmol month<sup>-1</sup> for phosphate) until the middle of the century ~~and (with a period of increased~~  
390 incoming fluxes of both phosphate and nitrate in the 1990s) and then increase to reach values higher  
than the control in the last 25 years of simulations (Figure 4). Outgoing fluxes follow the same  
trends as incoming fluxes: total outgoing nitrate and phosphate fluxes decrease from 1980 to 2040  
(flux values getting closer to zero) and then increase until the end of the century. We observe a  
~~drift-decreasing trend~~ in the nitrate outgoing flux in the control (from -129 to -110 Gmol month<sup>-1</sup>  
395 representing about 18 %). At the end of the 21st century, incoming fluxes of ~~nutrient-nutrients~~ have  
increased in the scenario simulation by about 13 % (difference between the 2080–2099 and 1980–  
1999 periods). But this significant increase (linear regression reveals a positive slope with correlation  
coefficient greater than 0.75 and p-value < 0.001 for the second half of the simulation period for  
both nitrate and phosphate) follows a decrease of over 20 % in incoming nutrient fluxes between the  
400 1980–1999 and the 2030–2049 periods. Most of the decrease is observed between 2030 and 2040  
(decrease of 15 and 1 Gmol month<sup>-1</sup> for nitrate and phosphate respectively during this decade).  
Outgoing fluxes increase less between the beginning and the end of the century (3.5 and 3.9 %  
for phosphate and nitrate respectively, Figure 4). If the relative changes in incoming and outgoing  
fluxes seem to indicate an increase in the net incoming flux, the absolute values seem to show a  
405 rather steady net flux between the beginning and the end of the century. Net flux at the beginning  
of the century is around -83 Gmol month<sup>-1</sup> for nitrate and -3 Gmol month<sup>-1</sup> for phosphate. At  
the end of the century, the fluxes are about -80 Gmol month<sup>-1</sup> and -2.5 Gmol month<sup>-1</sup> for nitrate  
and phosphate respectively. Also, these net fluxes are close to the CTRL net fluxes. These trends  
result from the evolution of water fluxes through the Strait of Gibraltar computed by NEMOMED8  
410 and the A2 scenario of nutrient concentrations in the buffer zone taken from Dufresne et al. (2013).  
~~Figures 7a and 4b show that the evolution of phosphate concentration in the western basin is linked~~  
~~with Gibraltar inputs (Pearson's correlation coefficient is 0.63, p-value=10<sup>-14</sup>).~~

The imbalance between incoming and outgoing nutrient flux anomalies may be a cause for the  
observed accumulation of inorganic nutrients (in particular of nitrate) in the basin.

### 415 3.3.3 River fluxes of nutrients

River discharge is the main external source of ~~nutrient~~ phosphate for the eastern part of the basin (Krom et al., 2004; Christodoulaki et al., 2013). Figure 5 shows the total ~~river discharges~~ discharge of phosphate and nitrate from rivers to the Mediterranean Sea ~~in nitrate and phosphate during the~~.

420 Phosphate discharge decreases by 25 % between the beginning and the end of the simulation period. As suggested by Ludwig et al. (2010), phosphate discharge in the A2 period stays lower than in the HIS period, in spite of a small discharge enhancement between 2030 and 2049.

Nitrate discharge in the HIS/A2 simulation is significantly higher than in CTRL ~~nitrate (between 30 and 60 Gmol month<sup>-1</sup> difference)~~. Nitrate total discharge in the Mediterranean has continuously  
425 increased from the 1960s (see the CTRL values for the years 1966–1981). According to the HIS/A2 simulation, total river nitrate discharge is 24 % larger during 2080-2099 than during 1980-1999. ~~Simultaneously, phosphate discharge decreases by 25 %. As suggested by Ludwig et al. (2010), phosphate discharge in the A2 period stays lower than in the HIS period, in spite of a small discharge enhancement between 2030 and 2049.~~

### 430 3.3.4 Sedimentation

Sedimentation removes nutrients from the Mediterranean Sea. In this version of PISCES, the loss of nitrogen and phosphorus to the sediment is calculated from the sinking of organic carbon particles to the sediment (linked through the Redfield ratio). Sediment fluxes of phosphorus and nitrogen during the simulations are shown in Figure 6.

435

The loss to the sediment decreases rapidly during the HIS simulation (1980–1999). By the end of the 21st century, sedimentation of P and N are almost 50 % lower relative to the 1980 fluxes. ~~This strong decrease in sedimentation that occurs despite an enhancement in nutrient flux coming from the Atlantic and an enhanced nitrate river flux may be linked to the decrease in vertical water fluxes, which would explain the accumulation~~

440

### 3.3.5 Evolution of phosphate and nitrate concentrations

In order to observe the general evolution of nutrient concentrations over the 21st century, we plotted the evolution of phosphate and nitrate in concentrations for the entire simulation period in the western and eastern basins. The separation between western and eastern basin is the Sicily Strait. Therefore, the eastern basin includes the Ionian, Levantine, Adriatic and Aegean basins. Figure 7 shows the evolution of average phosphate concentrations in the western and eastern basin, respectively, for the surface (0–200 m), intermediate (200–600 m) and bottom (> 600 m) layers of the deep layers

445

of the Mediterranean Sea (Figures 7e, 7f, 8e and 8f). water column.

In general, the sum of nitrogen fluxes in the Mediterranean basin increases by 39 % at the end of the century in the scenario (Figures 7a and 4b show that the evolution of surface phosphate concentration in the western basin is linked with phosphate inputs through the Strait of Gibraltar (Pearson's correlation coefficient is 0.85,  $p$ -value < 1 %). We observe that phosphate concentration in HIS/A2) whereas it is increased by 23 % in the control (CTRL). The sum of phosphorus fluxes increases by 9 % in the scenario and by 11 % in the control. These results suggest a significant accumulation of nitrogen in the Mediterranean basin over the century when phosphorus fluxes can be considered roughly stable. Tables 2 and 3 summarize the average phosphate and nitrate content in all simulations for 3 periods of time: the beginning of the century (1980–1999), A2 decreases in the surface and intermediate layers of the western basin until the middle of the century (2030–2049) and concentration decreases by about  $0.015 \text{ mmol m}^{-3}$  in the surface layer and by  $0.017 \text{ mmol m}^{-3}$  in the intermediate layer) and then increases again until the end of the century (2080–2099). Phosphate content in to reach similar concentration than in 1980 in the surface layer and higher concentrations than in 1980 in the intermediate layer (about  $0.01 \text{ mmol m}^{-3}$  higher). This evolution is different than the controls. Figure 7a shows that the difference in phosphate concentrations in the surface layer of the western Mediterranean in the entire Mediterranean has increased in our simulation by 6 % over the CTRL. RG and CTRL\_R simulations is important only at the end of the 21st century, as determined by the difference between CTRL and century (approximately from 2070). Therefore, we hypothesize that the similar evolutions of phosphate concentration in HIS/A2 simulations between 1980–1999 and 2080–2099. The increase is more important in the eastern basin than in the western basin. In particular, we observe an 8 % increase in phosphate content in A2 and of incoming fluxes of phosphate through the Strait of Gibraltar throughout the simulation period are linked with changes in physical conditions. In this very dynamic part of the Mediterranean, changes in physical conditions linked with climate change are preconditioning the western basin to become more sensitive to nutrient fluxes through the Strait of Gibraltar. A slight accumulation of about  $0.015 \text{ mmol m}^{-3}$  of phosphate is observed in the HIS/A2 simulation in the deep western basin. The significant difference between the HIS/A2 simulation and the control runs shows that the evolution of the Ionian–Levantine sub-basin in 2080–2099 compared to 1980–1999. The effects of phosphate river input changes are substantial over the first half of the century. We observe 3 % decrease in phosphate content in the entire Mediterranean between 1980–1999 and 2030–2049 due to river input changes (difference between CTRL\_R and CTRL). Changes in Gibraltar exchange fluxes of phosphate seem to have limited effect on the Mediterranean phosphate content. However, climate change effects lead to a global enhancement of 10 % in phosphate content in 2080–2099 in comparison to 1980–1999. This result shows contrasted effects of physical and biogeochemical conditions on the evolution of nutrient concentrations. Mediterranean physics linked with climate change is primarily responsible for

the changes in phosphate concentration in the intermediate and deep western basin. Climate change effects lead to an accumulation of phosphate in the intermediate and deep layer that is probably linked to a decrease in surface primary productivity (hence, in nutrient consumption and export), decreased sediment fluxes (see Figure 6), and increased stratification, thus isolating most of the phosphate pool from the surface.

Table 3 shows that in the model, Nutrient concentrations in the eastern part of the basin are lower than in the western part (50 % lower phosphate concentration in the surface layer, about 30 % lower concentration in the intermediate layer and about 15 to 20 % lower concentration in the combined effects of climate, riverine and Atlantic nutrients input changes over the deep layer). In the surface layer, phosphate concentration decreases in the beginning of the simulation and remains low during the 21st century lead to a 17 % increase in nitrate content over the Mediterranean in the 2080–2099 period compared to 1980–1999 (derived from the calculation of HIScentury (from 0.022 mmol m<sup>-3</sup> in 1980 to less than 0.015 mmol m<sup>-3</sup> in 2000, Figure 7d). There is, however, a large annual variability in surface phosphate concentration with peaks up to 0.025 mmol m<sup>-3</sup> in 2060. But the HIS/A2-CTRL). Changes in river discharge in the Mediterranean over the century lead to 9 % enhancement of nitrate content by the end of the century (2080–2099) compared to the beginning of the simulation period (1980–1999). The most important effects of river input changes are observed in the Adriatic basin (over 50 % nitrate accumulation by the end of the century). Over the entire Mediterranean, the effects of Gibraltar input changes on nitrate content are weak (< 1 %). However, the comparison of nitrate content in CTRL\_R and CTRL\_RG in the western basin shows a 3 % A2 simulation values are consistently below the CTRL concentrations showing an important effect of climate change on surface phosphate reduction. We observe in Figures 7e and 7f an accumulation of phosphate in the intermediate and deep layers (17 and 13 % respectively), with large decennial variability of phosphate concentration in the deep eastern basin. In both of these layers, HIS/A2 concentrations are higher than the CTRL concentrations.

The evolution of nitrate concentration shows an accumulation over the century in all regions of the intermediate and deep Mediterranean waters (between 9 and 20 %) in the HIS/A2 simulation (Figures 8b, 8c, 8e and 8f). In the surface western basin, the evolutions of the HIS/A2 and CTRL\_RG simulations are similar, showing the regulating effects of fluxes through the Strait of Gibraltar (Figure 8d). In the intermediate layer, nitrate concentration in the HIS/A2 simulation is decreasing from 4.05 to 3.6 mmol m<sup>-3</sup> between 1980 and 2030. After 2030, the concentration increases again up to 4.3 mmol m<sup>-3</sup>. In the deep western basin, we observe a slight decrease in nitrate content in the western basin during the 2030–2049 period followed by an increase resulting in +1 % nitrate by 2080–2099 compared to the 1980–1999 period. Finally, climate change effects lead to 7 % increase in nitrate content over the Mediterranean basin in the 2080–2099 period compared to 1980–1999 (computed by concentration in the controls from 4.4 to about 4.15 mmol m<sup>-3</sup> whereas there is a slight accumulation from 4.5 to 4.75 mmol m<sup>-3</sup> in the HIS/A2-CTRL\_RG). These results



~~indicate that river inputs and climate change are the main drivers of nitrate content changes in the Mediterranean basin over the 21st century.~~

A2 over the simulation period.

In the eastern basin, the impacts of river discharges of nitrate seem to have large influence on the nitrate accumulation as shown by the similar evolution of HIS/A2 and CTRL\_R simulations (Figures 8e and 8f). However, the evolution of physical conditions seems to have similarly large impacts on the nitrate concentrations in the eastern basin as shown by the difference between CTRL\_R and HIS/A2 (see also Table 3). In particular, nitrate concentrations increase by about  $0.5 \text{ mmol m}^{-3}$  between 1980 and 2099 in the deep eastern basin. Approximately 50 % of this accumulation is due to river discharge. The large differences between the CTRL simulations and the HIS/A2 show that modification of circulation resulting from climate change have substantial impacts on the deep and intermediate nutrient concentrations. Figure 8d shows the contrasted effects of climate and biogeochemical changes. The strong difference between CTRL\_R and CTRL concentrations at the beginning of the simulation (almost  $0.4 \text{ mmol m}^{-3}$ ) indicates that riverine nutrient discharge has a strong influence on surface nitrate concentrations in the eastern basin and is responsible for an important part of the eastern Mediterranean nitrate budget (see also Table 3). But the strong difference between CTRL\_R and HIS/A2 at the end of the century indicates that vertical stratification leads to a decrease in surface layer nitrate concentrations, probably linked both with lower winter mixing and nutrient consumption by phytoplankton.

### **3.4 Present and future ~~biological~~ surface nutrient concentrations, primary productivity and nutrient limitations in the surface Mediterranean**

Figures 9 and 10 show the average surface concentrations of nitrate and phosphate in the beginning of the century (1980–1999) and the relative concentration differences with the end of the century (~~2080–2099~~) in the HIS/A2 and CTRL simulations. In the Mediterranean Sea, ~~biological~~ primary productivity is mainly limited by these 2 nutrients and their evolution in the future may ~~determine~~ impact the productivity of the basin. Figure 9 confirms the previous results ~~and shows showing~~ an accumulation of nitrate in large zones of the basin, except for the southwestern part of the western basin (Alboran Sea) and a small area in the southeastern Levantine ~~that appears to be the result of Nile discharge influence.~~

On the contrary, Figure 10 shows that phosphate surface concentration is decreasing everywhere in the basin except near the mouth of the Nile and in the Alboran Sea. The specific concentrations observed next to the Nile mouth are linked with an inversion of the N:P ratio (i.e. increase in P discharge and decrease in N discharge) in this river in our scenario. The distribution of surface phosphate concentration at the end of the century (2080–2099) shows that all P-rich areas of the

eastern basin at the beginning of our simulations are largely depleted by the end of the simulation.

560 For instance, the P rich ~~area between areas around~~ Crete and Cyprus ~~is~~ are no longer observed in the 2080–2099 period (Figure 10). Moreover, Figure 11 shows that ~~this area matches a productive zone observed in the 1980–1999 period~~ these areas match productive zones. All the most productive zones of the beginning of the century are reduced in size and intensity by the end of the century. The primary production integrated over the euphotic layer (0–200 m) is reduced in our simulation  
565 by 10 % on average between 1980–1999 and 2080–2099. However, Figure 11 shows a productivity decrease of more than 50 % in areas such as the Aegean Sea and the Levantine Sea. In general, the differences in surface biogeochemistry between the 1980–1999 and 2080–2099 periods are weaker in the western basin because of the strong regulating impact of ~~Gibraltar nutrient exchange~~ nutrient exchange through the Strait of Gibraltar. The large scale reduction of surface primary productivity  
570 may be a cause for the observed reduction in sedimentation (see Figure 6).

We also observe local changes in nutrient concentrations and primary production. For instance, around ~~Majorea Island, Corsica and~~ Cyprus, changes in local concentrations of nutrients (decrease of about 50 % in phosphate concentration) have substantial effects on primary productivity (decrease from 40-50 gC m<sup>-2</sup> year<sup>-1</sup> to 20-30 gC m<sup>-2</sup> year<sup>-1</sup>). These mesoscale changes may be linked with  
575 local circulation changes (such as mesoscale eddies). These observations show that the evolution of the Mediterranean biogeochemistry is influenced by both meso and large scale circulations patterns.

Figure 12 presents the limiting nutrient calculated using PISCES half-saturation coefficients (see  
580 Aumont and Bopp, 2006). The limiting nutrient is derived from the minimal value of limitation factors. In the Monod-type model PISCES, nutrient-based growth rates follow a Michaelis–Menten evolution with nutrient concentrations. In the present period, most of the productive areas are N and P colimited in the simulation (Figure 12). This includes regions such as the Gulf of Lions, the South Adriatic, the Aegean Sea and the northern Levantine. Future accumulation of nitrogen in the basin  
585 ~~would modify~~ modifies the nutrient balance causing most eastern Mediterranean surface waters to become P-limited. ~~Thus, future phosphate surface concentrations in the Mediterranean would tend to decrease.~~ The total balance of phosphate is more negative in the future than in the present period whereas we observe an inverse situation for nitrate. Therefore, phosphate would become the major limiting nutrient in most of the regions where productivity is reduced such as the Aegean Sea, the  
590 northern Levantine basin and the South Adriatic.

### 3.5 Modifications of the Mediterranean deep chlorophyll maximum

One specificity of Mediterranean biology is that most planktonic productivity occurs below the surface at a depth called the deep chlorophyll maximum (DCM). Hence, most of the chlorophyll

595 concentration is not visible by satellites (Moutin et al., 2012). Figure 13 shows the average depth of the simulated DCM for the period 1980–1999 and for the period 2080–2099.

We observe that the DCM depth changes little during the simulation, even though the physical characteristics of the water masses do change ([salinity and temperature](#)). The DCM tends to deepen  
600 slightly in some regions such as the South Ionian and the Tyrrhenian basin. These results suggest that the DCM depth is not significantly altered in the future but the intensity of subsurface productivity seems reduced (see Figure 11).

Figure 14 shows the average vertical profiles of chlorophyll at the DYFAMED station (43.25° N,  
605 7.52° E) and the average profiles for the western and eastern basins for the 1980–1999 and 2080–2099 periods. The results show that the subsurface chlorophyll maximum is still modeled at the end of the century. At the DYFAMED station, the average DCM depth is unchanged but surface concentration is ~~reduced~~[enhanced by about  \$25 \cdot 10^{-9} \text{ g L}^{-1}\$ . This shows that local variability in the Mediterranean circulation and biogeochemistry is important.](#) However, we simulated seasonal  
610 variability in the chlorophyll concentration profiles at the station with intensity and depth of DCM reduced by about 40 % for some month (not shown). In the western basin, the subsurface maximum in the present and future periods is located at the same depth (100–120 m), but the average ~~productivity~~[chlorophyll concentration](#) is reduced by almost 50 %, which confirms the results from Figure 13. In the eastern basin, ~~it~~[subsurface chlorophyll concentration](#) is reduced and the subsurface ~~productivity~~  
615 [chlorophyll](#) maximum deepens from 100–120 m to below 150 m.

In the oligotrophic Mediterranean, the majority of the chlorophyll is produced within the DCM. The changes ~~in DCM we observe combined with external nutrient input changes~~[circulation combined with changes in fluxes through the Strait of Gibraltar and riverine inputs](#) result in 17 % reduction  
620 in integrated chlorophyll production between the 1980–1999 and 2080–2099 periods. Table 4 reports total chlorophyll production in the 1980–1999, 2030–2049 and 2080–2099 periods of all the simulations in all Mediterranean subbasins ~~Adloff et al. (Figure 2 2015)~~[\(Figure 2 from Adloff et al., 2015\)](#). Table 4 shows that chlorophyll production is stable over the CTRL simulation but decreases in all Mediterranean subbasins over the HIS/A2 simulation. The decrease in chlorophyll production is more important in  
625 the eastern regions, in particular in the Adriatic and Aegean Seas (-29 and -15 % respectively). In the western basin, the loss of chlorophyll is smaller (-13 %). The chlorophyll production is probably maintained by the enhancement of ~~Gibraltar nutrient fluxes~~[nutrient fluxes through the Strait of Gibraltar](#) (chlorophyll production in CTRL\_RG does not significantly decrease in the western basin).

630 The results indicate that 85 % of the reduction in chlorophyll production in the future period modeled in the HIS/A2 simulation is explained by climate effects (difference between HIS/A2 and CTRL\_RG).

However, the effects of increased ~~Gibraltar inputs~~ nutrient inputs through the Strait of Gibraltar, decreased riverine phosphate inputs and increased ~~nitrate inputs~~ riverine inputs of nitrate seem to have opposing effects to climate and circulation changes on chlorophyll production. In particular, in the western basin, changes in riverine discharge of nutrients seem to reduce chlorophyll production (see CTRL\_R values), whereas changes in ~~Gibraltar inputs~~ fluxes through the Strait of Gibraltar seem to enhance chlorophyll production (see CTRL\_RG).

### 3.6 Plankton biomass evolution

Most of the biological activity in the marine environment is confined to the euphotic layer which is confined to the upper 200 m. Figure 15 shows the evolution of nanophytoplankton and diatom concentrations in the top 200 m for the entire simulation period in all simulations in the western and eastern basins. ~~We observe~~ In HIS/A2, we observe lower biomass for both phytoplankton classes ~~their biomass~~ across the Mediterranean Sea ~~are lower~~ at the end of the century than ~~in the present conditions~~ at the beginning. In general, diatoms seem more sensitive to climate change and their biomass decreases more sharply than nanophytoplankton. Moreover, Figure 15c shows that diatom concentrations in the western basin seem to be sensitive to changes in nutrient input across the Strait of Gibraltar as indicated by the large difference between CTRL\_RG and CTRL\_R. However, the low diatom concentration observed in HIS/A2 indicates that the evolution of the diatom concentration over the 21st century is primarily influenced by climatic drivers.

Figure 16 shows the evolution of zooplankton biomass in the top 200 m during the simulation. The same general evolution is found than for the simulated phytoplankton: a decrease in microzooplankton during 1980–2000 (from 0.165 to approximately 0.114 mmol m<sup>-3</sup>), after which it remains stable and consistently below the CTRL values until the end of the simulation in ~~2100~~ 2100 in all basins; ~~a~~. A large drawdown in mesozooplankton levels is simulated in the eastern basin. The average mesozooplankton concentration in the eastern part of the Mediterranean declines by almost 60 % in 2099 in comparison to 1980. However, the average mesozooplankton concentration over the 2080–2099 period is only slightly lower than the average concentration over the 1980–1999 period (0.10 and 0.11 mmol m<sup>-3</sup> respectively) because the decline in concentration occurs within the first years of the HIS/A2 simulation. In the western basin, we observe a marked decrease of mesozooplankton concentrations between 1980 and ~~2040~~ 2040 (a decrease of 0.05 mmol m<sup>-3</sup> is observed between these 2 periods). After 2040, ~~surface concentrations of mesozooplankton~~ mesozooplankton surface concentration increases regularly to similar values than at the beginning of the simulation. This evolution is similar to those ~~for~~ of nutrient concentrations in surface waters of the western basin (Figure 7). In the PISCES model, zooplankton, and in particular mesozooplankton is highly sensitive to the variations of external climatic and biogeochemical conditions because that is the highest trophic level represented. Owing to their bottom-up control, zooplankton canalize all changes at

the basin scale and ultimately displays the largest response. This behavior is similar to the trophic amplification observed by Chust et al. (2014) and Lefort et al. (2015).

~~After all~~ Altogether, the analysis of plankton biomass evolution during the simulation period suggests that primary and secondary production in the eastern basin are more sensitive to climate change than the western basin in this simulation. The eastern part of the basin is more isolated from the open Atlantic Ocean than is the western part and it receives less nutrients from the Atlantic and from coastal inputs. The eastern basin is also deeper and less productive than the western basin (Crispi et al., 2001). The eastern basin exhibits a decline in the phytoplankton biomass that is similar to the decline in the phosphate concentration. Biological production is mainly P-limited in this basin (see also Figure 12). Therefore, the constant low concentrations of phosphate observed throughout this century limit biological production and keep plankton biomass at low levels.

## 4 Discussion

### 4.1 Biogeochemical forcings

Climate change may impact all drivers of biogeochemical cycles in the ocean. In the case of semi-enclosed seas like the Mediterranean, the biogeochemistry is primarily influenced by external sources of nutrients (~~namely rivers, Atlantic and atmospheric inputs~~) and (~~namely rivers, Atlantic and atmospheric inputs, see Ludwig et al.,~~

~~and~~ modification of the physical ocean (~~vertical mixing, horizontal advection, ...~~). (vertical mixing, horizontal advection, ..., see Sant

~~Nutrient fluxes from these sources~~ external sources (rivers, aerosols and fluxes through the Strait of Gibraltar) may evolve separately and differently depending on ~~socioeconomic~~ socio-economic decisions and climate feedbacks. In this study, different scenarios were used for river inputs (~~"Business as Usual" from Ludwig et al.,~~ "Order from Strength" from Ludwig et al., 2010, based on the Millenium Ecosystem Assessment report)

and for Atlantic nutrient concentrations (SRES/A2 from Dufresne et al., 2013). ~~No atmospheric deposition was considered in this study because there is, to our knowledge, no transient scenario for atmospheric deposition evolution over the Mediterranean Sea.~~ Scenarios from the MEA report are based on different assumptions from the IPCC SRES scenarios used to compute freshwater runoff in the HIS/A2 simulation. Moreover, the Ludwig et al. (2010) nutrient discharge transient scenario does not represent the interannual variability of nutrient runoff from rivers. Other studies by Herrmann et al. (2014) and Macias et al. (2015) used continued present-day discharge of nutrients. As there is no consensus nor validated scenario for nutrient fluxes from ~~coastal~~ riverine runoff in the Mediterranean, we chose to use one scenario from Ludwig et al. (2010). This scenario has the advantage of being derived from a coherent modeling framework. However, according to these authors, the socio-economic decisions made in the 21st century will influence nitrate and phosphate discharge over the Mediterranean. It is difficult to forecast these decisions and the resulting changes in nutrient ~~discharges~~ fluxes are uncertain. Moreover, our results emphasize that the biogeochemistry

in many coastal regions of the Mediterranean Sea such as the Adriatic Sea are highly influenced by ~~coastal nutrient inputs~~ riverine nutrient inputs, which is in accordance with previous work (e.g. Spillman et al., 2007, and references th

705 . In these regions, the effects of nutrient runoff ~~changes from rivers~~ seem more important than climate change effects (see Table 4). In the Adriatic basin, table 3 shows that riverine nitrate discharge is responsible for 41 % increase in nitrate concentration over the simulation period (difference between the 1980–1999 and the 2080–2099 periods). In the CTRL\_RG simulation, nitrate concentrations are similar to the CTRL\_R simulation showing no influence of fluxes through the Strait of Gibraltar  
710 in this region. Finally, nitrate concentrations in the HIS/A2 simulation are close to the CTRL\_R values showing that most of the nitrate evolution in this region is linked with riverine discharge. Therefore, the choice of ~~coastal-river~~ runoff scenario will greatly influence the results in these regions. Associated discrepancies and the uncertainties linked with the use of inconsistent scenarios in our simulation should be addressed by ~~developping~~ developing a more integrated ~~modeling~~ modelling  
715 framework to study the impacts of climate change on the Mediterranean Sea biogeochemistry.

No transient atmospheric deposition was considered in this study because there is, to our knowledge, no transient scenario for atmospheric deposition evolution over the Mediterranean Sea. However, in order to evaluate the potential effects of aerosol deposition on the future Mediterranean Sea, we performed 2 simulations with respectively total nitrogen ( $\text{NH}_4 + \text{NO}_3$ ) deposition (labeled HIS/A2\_N) and total nitrogen and natural dust deposition (labeled HIS/A2\_NALADIN). The deposition fields are derived from the global model LMDz-INCA and the regional model ALADIN-Climat respectively (see Richon et al., 2017, and references therein for description and evaluation of the atmospheric models)  
720 . The atmospheric deposition fields represent present-day aerosol deposition fluxes that are repeated over the 1980–2099 simulation period. The following figure (Figure 17) shows the relative effects of total nitrogen and natural dust deposition on surface primary production in the 1980–1999 and  
725 2080–2099 periods. As shown in Richon et al. (2017), dust deposition is a source of phosphate for the surface Mediterranean. As our HIS/A2 simulation shows a decrease in surface  $\text{PO}_4$  concentrations, thus accentuating phosphate limitation over the Mediterranean basin by the end of the 21st century, the relative effects of phosphate deposition from dust are increased in the 2080–2099 period in  
730 comparison to the 1980–1999 period. Conversely, nitrogen atmospheric deposition has very little effect on Mediterranean primary production at the end of the simulation period because most of the basin is not N-limited.

## 4.2 Climate change scenario

735 Although the physical model adequately represents the MHTC (Adloff et al., 2015), there are many uncertainties linked with climate change projections. Some are discussed in Somot et al. (2006), in particular, the need to using different IPCC scenarios for climate change projections and ~~THC~~ MTHC changes. Adloff et al. (2015) apply an ensemble of SRES scenarios and boundary conditions

to the Mediterranean Sea and discuss their effects on MTHC. In particular, their results suggests  
740 that the choice of atmospheric and Atlantic conditions has a strong influence on the MTHC. The A2  
scenario that we used was the only available with 3–D daily forcings for coupling with the PISCES  
biogeochemical model. However, Adloff et al. (2015) showed that other SRES scenarios such as  
the A1B or B1 may lead to a future decrease in the vertical stratification with probably different  
consequences on the Mediterranean Sea biogeochemistry. Our study should be considered as a first  
745 step for transient modeling of the Mediterranean Sea biogeochemistry but should be complemented  
by new simulations that explore the various sources of uncertainty (model choice, internal variability,  
scenario choice) once appropriate forcings become available for multiple models as expected from  
the Med–CORDEX initiative (Ruti et al., 2015).

### 4.3 Uncertainties from the PISCES model

750 The evaluation of the CTRL simulation showed that NEMOMED8/PISCES is stable over time  
in spite of a slight drift in nitrate concentrations (see Figure 8). Nutrient concentrations in the  
intermediate and deep layers were shown to be ~~slightly~~ underestimated in comparison to measurements  
(see appendix). Nutrient concentrations can be underestimated by up to 50 %, in particular in  
the deep eastern basin. Moreover, nitrate fluxes from coastal discharge in CTRL are lower than  
755 in HIS/A2. ~~This discrepancy~~ The low riverine discharge and the imbalance in sources and sinks  
explains the loss of nitrate in the CTRL (see Figures 8 and 9). Organic forms of nutrients are  
not directly available to phytoplankton in this version of PISCES, and are not included in our  
nutrient budgets. Powley et al. (2017) show that organic forms of nutrient are an important part of  
the Mediterranean elemental budgets. Therefore, we may be missing a part of the N and P budgets  
760 in our calculations. The simulated chlorophyll–a vertical profiles at the DYFAMED station show a  
correct representation of the subsurface productivity maximum of the Mediterranean in spite of a  
mismatch in the subsurface chlorophyll maximum depth between model and measurements. Model  
values were not corrected to match data, and we are therefore conscious that the uncertainties in  
the representation of present–day biogeochemistry by the PISCES model may be propagated in the  
765 future.

In the PISCES version used in this study, nitrate and phosphate concentration variations are linked  
by the Redfield ratio (Redfield et al., 1963). The Redfield hypothesis of a fixed nutrient ratio used  
for plankton growth and excretion holds true for most parts of the global ocean, but may not be true  
for oligotrophic regions such as the Mediterranean Sea (e.g. Béthoux and Copin-Montégut, 1986).  
770 Moreover, changes in nutrient balance influence the nutrient limitations as shown by Figure 12.  
The results simulated with the Redfieldian hypothesis are coherent with the observed variations  
of nutrient supply to the Mediterranean Sea and yield realistic biological productivity. But results  
concerning nutrient limitations might change in a non Redfieldian biogeochemistry model.



#### 4.4 Climate versus biogeochemical ~~forcing changes~~ effects

Figure 18 summarizes the fluxes of phosphate and nitrate in and out of the Mediterranean considered in this study.

In general, the sum of nitrogen net fluxes into the Mediterranean basin (Riverine, Gibraltar Strait and sedimentary sources and sinks) increases by 39 % at the end of the century in the scenario (HIS/A2) whereas it is increased by 23 % in the control (CTRL) in comparison to the beginning of the simulation (1980). The balance between inputs and outputs of phosphorus increases by 9 % in the scenario and by 11 % in the control (net gain of phosphorus in the basin). These results suggest a significant accumulation of nitrogen in the Mediterranean basin over the century when phosphorus fluxes can be considered roughly stable. The strong decrease in sedimentation (Figure 6) occurring in spite of an enhancement in nutrient flux, coming from the Atlantic and an enhanced nitrate river flux may be linked to the decrease in vertical water fluxes. This would explain the accumulation of phosphate and nitrate in the deep layers of the Mediterranean Sea (Figures 7c, 7f, 8c and 8f). The difference between HIS/A2 and CTRL\_RG phosphate concentrations (Figure 7) indicates that the variations of phosphate concentrations during the 21st century are primarily linked with climate change whereas nitrate concentration seems equally sensitive to changes in biogeochemical forcings.

To our knowledge, this is the first attempt to study the basin-scale biogeochemical evolution using a transient business-as-usual (A2) climate change scenario. Lazzari et al. (2014) tested the effects of several land-use change scenarios on the A1B SRES climate change scenario over 10-years ~~time~~ slices. They found a general decrease in ~~plankton biomass~~ phytoplankton and zooplankton biomasses (about 5 %) that is lower than in our severe climate change scenario. ~~They~~ In our simulations, average phytoplankton biomass decreases by about 2 to 30 % (see Figure 15 and average zooplankton biomass decreases by about 8 and 12 % (see Figure 16. However, our transient simulations revealed non linear trends in plankton biomass evolution. Lazzari et al. (2014) also conclude that the river mouth regions are highly sensitive because the Mediterranean Sea is influenced by external nutrient inputs. Our results show the same sensitivity of the Mediterranean to external nutrient inputs. Herrmann et al. (2014) studied the transient biogeochemical evolution of the northwestern Mediterranean Sea under the A2 and A1B scenarios with the coupled ECO3M-S/SYMPHONIE model. But they used present-day conditions for biogeochemical forcings, as did Macias et al. (2015). Results from Herrmann et al. (2014) indicate that chlorophyll ~~production concentration~~ and plankton biomass in the northwestern Mediterranean increase slightly as a result of vertical stratification. Our results indicate that the contrasting effects of vertical stratification ~~and changes in biogeochemical forcings~~ biogeochemical changes may lead to a decrease in chlorophyll concentration, phytoplankton and zooplankton biomass content of up to 50 % locally and between 2 and ~~plankton biomass production~~ 30 % at the basin scale ~~as indicated by Figures 14, 15 and 16. The modifications of chlorophyll~~

production and plankton biomass are linked to changes in nutrient limitation (Figure 12). Our finding that most of the Mediterranean basin is N and P co-limited seems in contrast with previous literature on the matter (see Krom et al., 2004, 2010; Pujo-Pay et al., 2011, and references therein). These authors found from analyses of the N:P ratio of the waters a clear phosphorus limitation in the major part of the Mediterranean. The discrepancy between our results and literature estimates comes from the way we calculate nutrient limitations. Considering how low nutrient concentrations are in the Mediterranean and how low the nutrient limitation factors are, the small difference between the limitation factors indicate that the Mediterranean is both limited in P and N. Finding no clear definition of nutrient co-limitation, we propose to consider that N and P are co-limiting when the difference in limitation factors is less than 1 %. This definition of nutrient co-limitation applies well to the Mediterranean case because of the very low nutrient concentrations. Chust et al. (2014) have shown that regional seas and in particular the Aegean and Adriatic were sensitive to trophic amplification. Our results seem to agree with these conclusions by showing sign of trophic amplification (see Figures 15 and 16). Finally, Luna et al. (2012) hypothesise that the warm temperature of the deep Mediterranean may be a cause for important nutrient recycling via prokaryotic metabolism. In the version of PISCES used in this study, nutrient recycling is dependant on oxygen, depth, plankton biomass and bacterial activity. Therefore, we could not observe the effects of temperature on nutrient recycling.

Results from our different control simulations indicates the extent to which the choice of the biogeochemical forcing scenario may influence the future evolution of the Mediterranean Sea biogeochemistry. In particular, nutrient inputs ~~at~~ through the Strait of Gibraltar have substantial consequences on the western basin. Results from Figures 7a and 8a and Table 4 indicate that the increase in nutrient inputs through the Strait of Gibraltar at the end of the century is responsible for a 2.5 % increase in chlorophyll concentration in the western basin during the 2080–2099 period. Moreover, climate and nutrient forcing changes may have contrasting influences on the Mediterranean Sea biogeochemistry. Stratification may lead to increased productivity in the surface because of the nutrient concentration increase (see also Macias et al., 2015), while decreasing coastal discharges of phosphate may decrease the productivity in the basin.

## Conclusion

This study aims at assessing the transient effects ~~on~~ of climate and biogeochemical changes on the Mediterranean Sea biogeochemistry ~~from climate and biogeochemical forcings under the~~ under the high-emission IPCC A2 ~~climate change~~ scenario. The NEMOMED8/PISCES model adequately reproduces the main characteristics of the Mediterranean Sea: the west-to-east gradient of productivity, the main productive zones and the presence of a DCM, ~~in spite of certain shortcomings. Hence,~~ Hence, it appears reasonable to use it to study the future evolution of the biogeochemistry of the

Mediterranean basin in response to increasing atmospheric CO<sub>2</sub> and resulting climate change. For the first time, we performed a continuous simulation over the entire period of the future IPCC scenario (A2), between 1980 and 2099.

This study illustrates how future changes in physical and biogeochemical conditions, including warming, increased stratification, and changes in Atlantic and river inputs, can lead to a significant accumulation of nitrate and a decrease in biological productivity in the surface, thus affecting the entire Mediterranean ecosystem.

Our results also illustrate how ~~variations of the Mediterranean Sea biogeochemistry can be influenced by external nutrient inputs and that~~ climate change and nutrient ~~discharges~~ inputs from riverine sources and fluxes through the Strait of Gibraltar have contrasted influences on the Mediterranean Sea productivity. In particular, the biogeochemistry in the western basin displays similar nutrient trends as does its input across the Strait of Gibraltar. Therefore, it appears critical to correctly represent the future variations of external biogeochemical forcings of the Mediterranean Sea as they may have equally important influence on biogeochemical cycles as climate. The ~~eastern basin receives less nutrients from the Atlantic. As a consequence, its biogeochemistry~~ biogeochemistry of the eastern basin is more sensitive to vertical mixing and river inputs than the western basin (that receives regulating effects from exchanges through the Strait of Gibraltar) and the stratification observed in the future leads to a ~~steep~~ reduction in surface productivity.

Finally, this study accounts for the changes in ~~all external biogeochemical forcings except fluxes through the Strait of Gibraltar and riverine inputs, but some potentially important sources are missing such as direct wastewater discharge, submarine groundwater and~~ atmospheric deposition. ~~However, Richon et al. (2017, 2018) showed that atmospheric deposition can account for up to 80 % of phosphate supply in some Mediterranean Sea regions and has significant impacts on surface productivity. We did not include atmospheric deposition in this study because~~ Measurements and models are still missing in order to include comprehensive datasets for past and future evolution of these nutrient sources. The HIS/A2\_N and HIS/A2\_NALADIN simulations presented in the discussion section include continued present-day nitrogen and phosphate deposition. Although these atmospheric fluxes have been evaluated previously and were shown to represent correctly the deposition fluxes, there is no guarantee that these fluxes are going to remain consistent over the next century. Results showed that the future sensitivity of the Mediterranean to atmospheric deposition depends on the surface nutrient limitations. However, there is to our knowledge no available transient scenario for the 21st century evolution of atmospheric deposition ~~. But this nutrient source may be subject to important changes in the future and no ensemble simulations to assess the future evolution of the Mediterranean Sea under different climate change scenarios.~~ A new generation of fully coupled regional models have been developed and used to study aerosols climatic impacts (Nabat et al., 2015). These models include a representation of the ocean, atmosphere, aerosols and rivers and should be used to perform future climate projections consistent at the Mediterranean regional scale.

## Appendix A: Evaluation of the NEMOMED8/PISCES model

The comparison of modeled surface chlorophyll-*a* concentration with satellite estimates has revealed that the model correctly simulates the main characteristics observed in the Mediterranean Sea (~~Figure 1~~ Figures 1 and 2). Comparison with in situ observation provides more refined estimates.

Figure A1 presents the average chlorophyll-*a* profiles at the DYFAMED station (43.25°N, 7.52°E) compared with measured concentrations for the month of February (low stratification, high productivity) and ~~June (high stratification, low productivity)~~ May (end of spring bloom, beginning of stratification and DCM appearance). There are few data points below 200 m. The model produces the characteristic of the deep chlorophyll maximum generated in ~~June~~ May, even if its depth is too important. The colors show that the model represents some interannual variability in chlorophyll production in spite of the consistent bias.

The ~~vertical overestimation of the DCM depth may be due to the overestimation of nitracline and phosphacline as shown by figure A2.~~ This Figure shows the vertical profiles of nitrate and phosphate at the DYFAMED station in May, colors represent the different years in the model and in the observation.

The vertical distribution of nitrate and phosphate concentrations along a West-to-East transect is ~~showed~~ shown in Figure A3. The model produces the salient West-to-East gradient of nutrient concentrations. Concentrations in the surface layer seem correct ~~although the nutricline.~~ The nutricline is located 100 to 150 m deep in the western basin and deepens around 180 to 200 m in the eastern basin. Although the model represents the spatial variability of the nutricline, it is too smooth, leading to the underestimated underestimation of deep water concentrations -(by about 30 to 50 %).

## References

- Adloff, F., Somot, S., Sevault, F., Jordà, G., Aznar, R., Déqué, M., Herrmann, M., Marcos, M., Dubois,  
910 C., Padorno, E., Alvarez-Fanjul, E., and Gomis, D.: Mediterranean Sea response to climate change in an ensemble of twenty first century scenarios, *Climate Dynamics*, 45, 2775–2802, doi:10.1007/s00382-015-2507-3, <http://link.springer.com/article/10.1007/s00382-015-2507-3>, 2015.
- Albouy, C., Leprieur, F., Le Loc'h, F., Mouquet, N., Meynard, C. N., Douzery, E. J. P., and Mouillot, D.: Projected impacts of climate warming on the functional and phylogenetic components of coastal  
915 Mediterranean fish biodiversity, *Ecography*, 38, 681–689, doi:10.1111/ecog.01254, <http://doi.wiley.com/10.1111/ecog.01254>, 2015.
- Andrello, M., Mouillot, D., Somot, S., Thuiller, W., and Manel, S.: Additive effects of climate change on connectivity between marine protected areas and larval supply to fished areas, *Diversity and Distributions*, 21, 139–150, doi:10.1111/ddi.12250, <http://onlinelibrary.wiley.com/doi/10.1111/ddi.12250/abstract>, 2015.
- 920 Auger, P. A., Ulses, C., Estournel, C., Stemann, L., Somot, S., and Diaz, F.: Interannual control of plankton communities by deep winter mixing and prey/predator interactions in the NW Mediterranean: Results from a 30-year 3D modeling study, *Progress in Oceanography*, 124, 12–27, doi:10.1016/j.pocean.2014.04.004, <http://www.sciencedirect.com/science/article/pii/S0079661114000524>, 2014.
- Aumont, O. and Bopp, L.: Globalizing results from ocean in situ iron fertilization studies: GLOBALIZING  
925 IRON FERTILIZATION, *Global Biogeochemical Cycles*, 20, n/a–n/a, doi:10.1029/2005GB002591, <http://doi.wiley.com/10.1029/2005GB002591>, 2006.
- Beuvier, J., Sevault, F., Herrmann, M., Kontoyiannis, H., Ludwig, W., Rixen, M., Stanev, E., Béranger, K., and Somot, S.: Modeling the Mediterranean Sea interannual variability during 1961–2000: Focus on the Eastern Mediterranean Transient, *Journal of Geophysical Research: Oceans*, 115, C08017,  
930 doi:10.1029/2009JC005950, <http://onlinelibrary.wiley.com/doi/10.1029/2009JC005950/abstract>, 2010.
- Bonnet, S., Grosso, O., and Moutin, T.: Planktonic dinitrogen fixation along a longitudinal gradient across the Mediterranean Sea during the stratified period (BOUM cruise), *Biogeosciences*, 8, 2257–2267, doi:10.5194/bg-8-2257-2011, <http://www.biogeosciences.net/8/2257/2011/>, 2011.
- Bosc, E., Bricaud, A., and Antoine, D.: Seasonal and interannual variability in algal biomass and  
935 primary production in the Mediterranean Sea, as derived from 4 years of SeaWiFS observations: MEDITERRANEAN SEA BIOMASS AND PRODUCTION, *Global Biogeochemical Cycles*, 18, n/a–n/a, doi:10.1029/2003GB002034, <http://doi.wiley.com/10.1029/2003GB002034>, 2004.
- Béthoux, J. P. and Copin-Montégut, G.: Biological fixation of atmospheric nitrogen in the Mediterranean Sea, *Limnology and Oceanography*, 31, 1353–1358, doi:10.4319/lo.1986.31.6.1353, <http://onlinelibrary.wiley.com/doi/10.4319/lo.1986.31.6.1353/abstract>, 1986.  
940
- Béthoux, J. P., Morin, P., Chaumery, C., Connan, O., Gentili, B., and Ruiz-Pino, D.: Nutrients in the Mediterranean Sea, mass balance and statistical analysis of concentrations with respect to environmental change, *Marine Chemistry*, 63, 155–169, doi:10.1016/S0304-4203(98)00059-0, <http://www.sciencedirect.com/science/article/pii/S0304420398000590>, 1998.
- 945 Christodoulaki, S., Petihakis, G., Kanakidou, M., Mihalopoulos, N., Tsiaras, K., and Triantafyllou, G.: Atmospheric deposition in the Eastern Mediterranean. A driving force for ecosystem dynamics, *Journal*

of Marine Systems, 109–110, 78–93, doi:10.1016/j.jmarsys.2012.07.007, <http://linkinghub.elsevier.com/retrieve/pii/S0924796312001583>, 2013.

Chust, G., Allen, J. I., Bopp, L., Schrum, C., Holt, J., Tsiaras, K., Zavatarelli, M., Chifflet, M., Cannaby, H.,  
950 Dadou, I., Daewel, U., Wakelin, S. L., Machu, E., Pushpadas, D., Butenschon, M., Artioli, Y., Petihakis,  
G., Smith, C., Garçon, V., Goubanova, K., Vu, B. L., Fach, B. A., Salihoglu, B., Clementi, E., and Irigoien,  
X.: Biomass changes and trophic amplification of plankton in a warmer ocean, *Global Change Biology*, 20,  
2124–2139, doi:10.1111/gcb.12562, <https://onlinelibrary.wiley.com/doi/abs/10.1111/gcb.12562>, 2014.

Civitarese, G., Gacic, M., Lipizer, M., and Borzelli, G. L. E.: On the impact of the Bimodal Oscillating  
955 System (BiOS) on the biogeochemistry and biology of the Adriatic and Ionian Seas (Eastern Mediterranean),  
*Biogeosciences*, 7, 3987–3997, doi:10.5194/bg-7-3987-2010, wOS:000285574100006, 2010.

Claustre, H., Morel, A., Hooker, S. B., Babin, M., Antoine, D., Oubelkheir, K., Bricaud, A., Leblanc, K.,  
Quéguiner, B., and Maritorena, S.: Is desert dust making oligotrophic waters greener?, *Geophysical Research*  
*Letters*, 29, 107–1–107–4, doi:10.1029/2001GL014056, [https://agupubs.onlinelibrary.wiley.com/doi/abs/10.](https://agupubs.onlinelibrary.wiley.com/doi/abs/10.1029/2001GL014056)  
960 [1029/2001GL014056](https://agupubs.onlinelibrary.wiley.com/doi/abs/10.1029/2001GL014056), 2002.

Cork, S., Peterson, G., Petschel-Held, G., Alcamo, J., Alder, J., Bennett, E., Carr, E., Deane, D., Nelson,  
G., Ribeiro, T., and others: Four scenarios, Ecosystems and human well-being: Scenarios, 2, [http://www.](http://www.academia.edu/download/31005604/Millennium_assessment.pdf)  
[academia.edu/download/31005604/Millennium\\_assessment.pdf](http://www.academia.edu/download/31005604/Millennium_assessment.pdf), 2005.

Crispi, G., Mosetti, R., Solidoro, C., and Crise, A.: Nutrients cycling in Mediterranean basins: the role  
965 of the biological pump in the trophic regime, *Ecological Modelling*, 138, 101–114, doi:10.1016/S0304-  
3800(00)00396-3, <http://www.sciencedirect.com/science/article/pii/S0304380000003963>, 2001.

d’Ortenzio, F. and Ribera d’Alcalà, M.: On the trophic regimes of the Mediterranean Sea: a satellite analysis,  
*Biogeosciences*, 6, 139–148, <http://www.biogeosciences.net/6/139/2009/bg-6-139-2009.html>, 2009.

Déqué, M., Dreveton, C., Braun, A., and Cariolle, D.: The ARPEGE/IFS atmosphere model: a contribution  
970 to the French community climate modelling, *Climate dynamics*, 10, 249–266, [http://cat.inist.fr/?aModele=](http://cat.inist.fr/?aModele=afficheN&cpsidt=4250659)  
[afficheN&cpsidt=4250659](http://cat.inist.fr/?aModele=afficheN&cpsidt=4250659), 1994.

Dubois, C., Somot, S., Calmanti, S., Carillo, A., Déqué, M., Dell’Aquila, A., Elizalde, A., Gualdi, S., Jacob,  
D., L’Hévéder, B., Li, L., Oddo, P., Sannino, G., Scoccimarro, E., and Sevault, F.: Future projections of  
the surface heat and water budgets of the Mediterranean Sea in an ensemble of coupled atmosphere-ocean  
975 regional climate models, *Climate Dynamics*, 39, 1859–1884, doi:10.1007/s00382-011-1261-4, [http://adsabs.](http://adsabs.harvard.edu/abs/2012CJDy...39.1859D)  
[harvard.edu/abs/2012CJDy...39.1859D](http://adsabs.harvard.edu/abs/2012CJDy...39.1859D), 2012.

Dufresne, J.-L., Foujols, M.-A., Denvil, S., Caubel, A., Marti, O., Aumont, O., Balkanski, Y., Bekki, S.,  
Bellenger, H., Benshila, R., Bony, S., Bopp, L., Braconnot, P., Brockmann, P., Cadule, P., Cheruy, F.,  
Codron, F., Cozic, A., Cugnet, D., Noblet, N. d., Duvel, J.-P., Ethé, C., Fairhead, L., Fichefet, T., Flavoni,  
980 S., Friedlingstein, P., Grandpeix, J.-Y., Guez, L., Guilyardi, E., Hauglustaine, D., Hourdin, F., Idelkadi,  
A., Ghattas, J., Joussaume, S., Kageyama, M., Krinner, G., Labetoulle, S., Lahellec, A., Lefebvre, M.-P.,  
Lefevre, F., Levy, C., Li, Z. X., Lloyd, J., Lott, F., Madec, G., Mancip, M., Marchand, M., Masson, S.,  
Meurdesoif, Y., Mignot, J., Musat, I., Parouty, S., Polcher, J., Rio, C., Schulz, M., Swingedouw, D., Szopa,  
S., Talandier, C., Terray, P., Viovy, N., and Vuichard, N.: Climate change projections using the IPSL-CM5  
985 Earth System Model: from CMIP3 to CMIP5, *Climate Dynamics*, 40, 2123–2165, doi:10.1007/s00382-012-  
1636-1, <https://link.springer.com/article/10.1007/s00382-012-1636-1>, 2013.

- Dulac, F., BUAT-MÉNARD, P., Ezat, U., Melki, S., and Bergametti, G.: Atmospheric input of trace metals to the western Mediterranean: uncertainties in modelling dry deposition from cascade impactor data, *Tellus B*, 41, 362–378, <http://onlinelibrary.wiley.com/doi/10.1111/j.1600-0889.1989.tb00315.x/full>, 1989.
- 990 Dunić, N., Vilibić, I., Šepić, J., Somot, S., and Sevault, F.: Dense water formation and BiOS-induced variability in the Adriatic Sea simulated using an ocean regional circulation model, *Climate Dynamics*, doi:10.1007/s00382-016-3310-5, <http://link.springer.com/10.1007/s00382-016-3310-5>, 2016.
- Faugeras, B., Lévy, M., Mémery, L., Verron, J., Blum, J., and Charpentier, I.: Can biogeochemical fluxes be recovered from nitrate and chlorophyll data? A case study assimilating data in the  
995 Northwestern Mediterranean Sea at the JGOFS-DYFAMED station, *Journal of Marine Systems*, 40–41, 99–125, doi:10.1016/S0924-7963(03)00015-0, <http://www.sciencedirect.com/science/article/pii/S0924796303000150>, 2003.
- Fichaut, M., Garcia, M. J., Giorgetti, A., Iona, A., Kuznetsov, A., Rixen, M., and Group, M.: MEDAR/MEDATLAS 2002: A Mediterranean and Black Sea database for operational oceanography, in: Elsevier Oceanography Series, edited by H. Dahlin, K. Nittis and S. E. Petersson, N. C. F., vol. 69 of *Building the European Capacity in Operational Oceanography Proceedings of the Third International Conference on EuroGOOS*, pp. 645–648, Elsevier, <http://www.sciencedirect.com/science/article/pii/S0422989403801071>, 2003.  
1000
- Gallissai, R., Peters, F., Volpe, G., Basart, S., and Baldasano, J. M.: Saharan Dust Deposition May Affect  
1005 Phytoplankton Growth in the Mediterranean Sea at Ecological Time Scales, *PLoS ONE*, 9, e110762, doi:10.1371/journal.pone.0110762, <http://dx.plos.org/10.1371/journal.pone.0110762>, 2014.
- Gibelin, A.-L. and Déqué, M.: Anthropogenic climate change over the Mediterranean region simulated by a global variable resolution model, *Climate Dynamics*, 20, 327–339, doi:10.1007/s00382-002-0277-1, <https://link.springer.com/article/10.1007/s00382-002-0277-1>, 2003.
- 1010 Giorgi, F.: Climate change hot-spots, *Geophysical Research Letters*, 33, L08 707, doi:10.1029/2006GL025734, <http://onlinelibrary.wiley.com/doi/10.1029/2006GL025734/abstract>, 2006.
- Giorgi, F. and Lionello, P.: Climate change projections for the Mediterranean region, *Global and Planetary Change*, 63, 90–104, doi:10.1016/j.gloplacha.2007.09.005, <http://www.sciencedirect.com/science/article/pii/S0921818107001750>, 2008.
- 1015 Gómez, F.: The role of the exchanges through the Strait of Gibraltar on the budget of elements in the Western Mediterranean Sea: consequences of human-induced modifications, *Marine Pollution Bulletin*, 46, 685–694, doi:10.1016/S0025-326X(03)00123-1, <http://www.sciencedirect.com/science/article/pii/S0025326X03001231>, 2003.
- Guieu, C., Ridame, C., Pulido-Villena, E., Bressac, M., Desboeufs, K., and Dulac, F.: Dust deposition in an  
1020 oligotrophic marine environment: impact on the carbon budget, *Biogeosciences Discussions*, 11, 1707–1738, doi:10.5194/bgd-11-1707-2014, <http://www.biogeosciences-discuss.net/11/1707/2014/>, 2014.
- Harley, C. D. G., Randall Hughes, A., Hultgren, K. M., Miner, B. G., Sorte, C. J. B., Thornber, C. S., Rodriguez, L. F., Tomanek, L., and Williams, S. L.: The impacts of climate change in coastal marine systems, *Ecology Letters*, 9, 228–241, doi:10.1111/j.1461-0248.2005.00871.x, <http://onlinelibrary.wiley.com/doi/10.1111/j.1461-0248.2005.00871.x/abstract>, 2006.  
1025



- Hattab, T., Albouy, C., Lasram, F. B. R., Somot, S., Le Loc'h, F., and Leprieur, F.: Towards a better understanding of potential impacts of climate change on marine species distribution: a multiscale modelling approach, *Global Ecology and Biogeography*, 23, 1417–1429, doi:10.1111/geb.12217, <http://onlinelibrary.wiley.com/doi/10.1111/geb.12217/abstract>, 2014.
- 1030 Herrmann, M., Sevault, F., Beuvier, J., and Somot, S.: What induced the exceptional 2005 convection event in the northwestern Mediterranean basin? Answers from a modeling study, *Journal of Geophysical Research: Oceans*, 115, C12 051, doi:10.1029/2010JC006162, <http://onlinelibrary.wiley.com/doi/10.1029/2010JC006162/abstract>, 2010.
- 1035 Herrmann, M., Diaz, F., Estournel, C., Marsaleix, P., and Ulses, C.: Impact of atmospheric and oceanic interannual variability on the Northwestern Mediterranean Sea pelagic planktonic ecosystem and associated carbon cycle, *Journal of Geophysical Research: Oceans*, 118, 5792–5813, doi:10.1002/jgrc.20405, <http://onlinelibrary.wiley.com/doi/10.1002/jgrc.20405/abstract>, 2013.
- 1040 Herrmann, M., Estournel, C., Adloff, F., and Diaz, F.: Impact of climate change on the northwestern Mediterranean Sea pelagic planktonic ecosystem and associated carbon cycle, *Journal of Geophysical Research: Oceans*, 119, 5815–5836, doi:10.1002/2014JC010016, <http://onlinelibrary.wiley.com/doi/10.1002/2014JC010016/abstract>, 2014.
- 1045 Huertas, I. E., Ríos, A. F., García-Lafuente, J., Navarro, G., Makaoui, A., Sánchez-Román, A., Rodríguez-Galvez, S., Orbi, A., Ruíz, J., and Pérez, F. F.: Atlantic forcing of the Mediterranean oligotrophy, *Global Biogeochemical Cycles*, 26, GB2022, doi:10.1029/2011GB004167, <http://onlinelibrary.wiley.com/doi/10.1029/2011GB004167/abstract>, 2012.
- Ibello, V., Cantoni, C., Cozzi, S., and Civitarese, G.: First basin-wide experimental results on N<sub>2</sub> fixation in the open Mediterranean Sea, *Geophysical Research Letters*, 37, L03 608, doi:10.1029/2009GL041635, <http://onlinelibrary.wiley.com/doi/10.1029/2009GL041635/abstract>, 2010.
- 1050 IPCC: Managing the Risks of Extreme Events and Disasters to Advance Climate Change Adaptation. A Special Report of Working Groups I and II of the Intergovernmental Panel on Climate Change, Cambridge University Press, Cambridge, United Kingdom, and New York, NY, USA, 2012.
- IPCC and Working Group III: Emissions scenarios. a special report of IPCC Working Group III, Intergovernmental Panel on Climate Change, Geneva, <http://catalog.hathitrust.org/api/volumes/oclc/59436339.html>, oCLC: 891560334, 2000.
- 1055 Jordà, G., Marbà, N., and Duarte, C. M.: Mediterranean seagrass vulnerable to regional climate warming, *Nature Climate Change*, 2, 821–824, doi:10.1038/nclimate1533, <http://www.nature.com/nclimate/journal/v2/n11/abs/nclimate1533.html?foxtrotcallback=true>, 2012.
- 1060 Klein, B., Roether, W., Kress, N., Manca, B. B., Ribera d'Alcala, M., Souvermezoglou, E., Theocharis, A., Civitarese, G., and Luchetta, A.: Accelerated oxygen consumption in eastern Mediterranean deep waters following the recent changes in thermohaline circulation, *Journal of Geophysical Research: Oceans*, 108, 8107, doi:10.1029/2002JC001454, <http://onlinelibrary.wiley.com/doi/10.1029/2002JC001454/abstract>, 2003.
- 1065 Krom, M. D., Herut, B., and Mantoura, R. F. C.: Nutrient budget for the Eastern Mediterranean: Implications for phosphorus limitation, *Limnology and Oceanography*, 49, 1582–1592, doi:10.4319/lo.2004.49.5.1582, <https://aslopubs.onlinelibrary.wiley.com/doi/abs/10.4319/lo.2004.49.5.1582>, 2004.

- Krom, M. D., Emeis, K.-C., and Van Cappellen, P.: Why is the Eastern Mediterranean phosphorus limited?, *Progress in Oceanography*, 85, 236–244, doi:10.1016/j.pocean.2010.03.003, <http://www.sciencedirect.com/science/article/pii/S0079661110000340>, 2010.
- 1070 Lascaratos, A., Roether, W., Nittis, K., and Klein, B.: Recent changes in deep water formation and spreading in the eastern Mediterranean Sea: a review, *Progress in Oceanography*, 44, 5–36, doi:10.1016/S0079-6611(99)00019-1, <http://www.sciencedirect.com/science/article/pii/S0079661199000191>, 1999.
- Lazzari, P., Mattia, G., Solidoro, C., Salon, S., Crise, A., Zavatarelli, M., Oddo, P., and Vichi, M.: The impacts of climate change and environmental management policies on the trophic regimes in the Mediterranean Sea: Scenario analyses, *Journal of Marine Systems*, 135, 137–149, doi:10.1016/j.jmarsys.2013.06.005, <http://linkinghub.elsevier.com/retrieve/pii/S0924796313001425>, 2014.
- 1075 Lefort, S., Aumont, O., Bopp, L., Arsouze, T., Gehlen, M., and Maury, O.: Spatial and body-size dependent response of marine pelagic communities to projected global climate change, *Global Change Biology*, 21, 154–164, doi:10.1111/gcb.12679, <http://onlinelibrary.wiley.com/doi/10.1111/gcb.12679/abstract>, 2015.
- Locarnini, R. A., Garcia, H. E., Boyer, T. P., Antonov, J. I., and Levitus, S.: World Ocean Atlas 2005, Volume 3: Dissolved Oxygen, Apparent Oxygen Utilization, and Oxygen Saturation [+DVD], NOAA Atlas NESDIS, <http://www.vliz.be/nl/imis?module=ref&refid=117383&printversion=1&dropIMISitle=1>, 2006.
- 1080 Ludwig, W., Dumont, E., Meybeck, M., and Heussner, S.: River discharges of water and nutrients to the Mediterranean and Black Sea: Major drivers for ecosystem changes during past and future decades?, *Progress in Oceanography*, 80, 199–217, doi:10.1016/j.pocean.2009.02.001, <http://linkinghub.elsevier.com/retrieve/pii/S0079661109000020>, 2009.
- 1085 Ludwig, W., Bouwman, A. F., Dumont, E., and Lespinas, F.: Water and nutrient fluxes from major Mediterranean and Black Sea rivers: Past and future trends and their implications for the basin-scale budgets, *Global Biogeochemical Cycles*, 24, GB0A13, doi:10.1029/2009GB003594, <http://onlinelibrary.wiley.com/doi/10.1029/2009GB003594/abstract>, 2010.
- 1090 Luna, G. M., Bianchelli, S., Decembrini, F., Domenico, E. D., Danovaro, R., and Dell’Anno, A.: The dark portion of the Mediterranean Sea is a bioreactor of organic matter cycling, *Global Biogeochemical Cycles*, 26, doi:10.1029/2011GB004168, <https://agupubs.onlinelibrary.wiley.com/doi/abs/10.1029/2011GB004168>, 2012.
- Macias, D. M., Garcia-Gorri, E., and Stips, A.: Productivity changes in the Mediterranean Sea for the twenty-first century in response to changes in the regional atmospheric forcing, *Frontiers in Marine Science*, 2, doi:10.3389/fmars.2015.00079, <https://www.frontiersin.org/articles/10.3389/fmars.2015.00079/full>, 2015.
- 1095 Madec, G.: NEMO ocean engine, <http://eprints.soton.ac.uk/64324/>, 2008.
- Marty, J.-C., Chiavérini, J., Pizay, M. D., and Avril, B.: Seasonal and interannual dynamics of nutrients and phytoplankton pigments in the western Mediterranean Sea at the DYFAMED time-series station (1991–1999), *Deep-Sea Research, Part II. Topical Studies in Oceanography*, <http://www.vliz.be/en/imis?module=ref&refid=39389&printversion=1&dropIMISitle=1>, 2002.
- 1100 Monod, J.: *Recherches sur la croissance des cultures bactériennes*, Hermann, 1958.
- Morel, A. and Gentili, B.: Yellow substance and the shades of blue in the Mediterranean Sea, *Biogeosciences Discussions*, 6, 8503–8530, <http://adsabs.harvard.edu/abs/2009BGD.....6.8503M>, 2009.

- 1105 Moutin, T., Van Wambeke, F., and Prieur, L.: Introduction to the Biogeochemistry from the Oligotrophic to the Ultraoligotrophic Mediterranean (BOUM) experiment, *Biogeosciences*, 9, 3817–3825, doi:10.5194/bg-9-3817-2012, <http://www.biogeosciences.net/9/3817/2012/>, 2012.
- Nabat, P., Somot, S., Mallet, M., Sevault, F., Chiacchio, M., and Wild, M.: Direct and semi-direct aerosol radiative effect on the Mediterranean climate variability using a coupled regional climate system model, *Climate Dynamics*, 44, 1127–1155, doi:10.1007/s00382-014-2205-6, <https://link.springer.com/article/10.1007/s00382-014-2205-6>, 2015.
- 1110 Nittis, K., Lascaratos, A., and Theocharis, A.: Dense water formation in the Aegean Sea: Numerical simulations during the Eastern Mediterranean Transient, *Journal of Geophysical Research: Oceans*, 108, 8120, doi:10.1029/2002JC001352, <http://onlinelibrary.wiley.com/doi/10.1029/2002JC001352/abstract>, 2003.
- 1115 Palmieri, J., Orr, J. C., Dutay, J.-C., Béranger, K., Schneider, A., Beuvier, J., and Somot, S.: Simulated anthropogenic CO<sub>2</sub> storage and acidification of the Mediterranean Sea, *Biogeosciences*, 12, 781–802, doi:10.5194/bg-12-781-2015, <http://www.biogeosciences.net/12/781/2015/>, 2015.
- Powley, H. R., Dürr, H. H., Lima, A. T., Krom, M. D., and Van Cappellen, P.: Direct Discharges of Domestic Wastewater are a Major Source of Phosphorus and Nitrogen to the Mediterranean Sea, <https://core.ac.uk/display/74234820>, 2016.
- 1120 Powley, H. R., Krom, M. D., and Cappellen, P. V.: Understanding the unique biogeochemistry of the Mediterranean Sea: Insights from a coupled phosphorus and nitrogen model, *Global Biogeochemical Cycles*, 31, 1010–1031, doi:10.1002/2017GB005648, <https://agupubs.onlinelibrary.wiley.com/doi/abs/10.1002/2017GB005648>, 2017.
- 1125 Pujo-Pay, M., Conan, P., Oriol, L., Cornet-Barthaux, V., Falco, C., Ghiglione, J.-F., Goyet, C., Moutin, T., and Prieur, L.: Integrated survey of elemental stoichiometry (C, N, P) from the western to eastern Mediterranean Sea, *Biogeosciences*, 8, 883–899, doi:10.5194/bg-8-883-2011, <http://www.biogeosciences.net/8/883/2011/>, 2011.
- Redfield, A. C., Ketchum, B. H., and Richards, F. A.: The influence of organisms on the composition of seawater, *The sea: ideas and observations on progress in the study of the seas*, <http://www.vliz.be/en/imis?module=ref&refid=28944&printversion=1&dropIMISitle=1>, 1963.
- 1130 Richon, C., Dutay, J.-C., Dulac, F., Wang, R., Balkanski, Y., Nabat, P., Aumont, O., Desboeufs, K., Laurent, B., Guieu, C., Raimbault, P., and Beuvier, J.: Modeling the impacts of atmospheric deposition of nitrogen and desert dust-derived phosphorus on nutrients and biological budgets of the Mediterranean Sea, *Progress in Oceanography*, doi:10.1016/j.pocean.2017.04.009, <http://www.sciencedirect.com/science/article/pii/S0079661116301811>, 2017.
- 1135 Richon, C., Dutay, J.-C., Dulac, F., Wang, R., and Balkanski, Y.: Modeling the biogeochemical impact of atmospheric phosphate deposition from desert dust and combustion sources to the Mediterranean Sea, *Biogeosciences*, 15, 2499–2524, doi:10.5194/bg-15-2499-2018, <https://www.biogeosciences.net/15/2499/2018/>, 2018.
- 1140 Robinson, A. R., Leslie, W. G., Theocharis, A., and Lascaratos, A.: Mediterranean Sea Circulation, in: *Encyclopedia of Ocean Sciences (Second Edition)*, edited by Steele, J. H., pp. 710–725, Academic Press, Oxford, doi:10.1016/B978-012374473-9.00376-3, <http://www.sciencedirect.com/science/article/pii/B9780123744739003763>, 2001.

- 1145 Rodellas, V., Garcia-Orellana, J., Masqué, P., Feldman, M., and Weinstein, Y.: Submarine groundwater discharge as a major source of nutrients to the Mediterranean Sea, *Proceedings of the National Academy of Sciences*, 112, 3926–3930, doi:10.1073/pnas.1419049112, <http://www.pnas.org/content/112/13/3926>, 2015.
- Roether, W., Klein, B., and Hainbucher, D.: The Eastern Mediterranean Transient, in: *The Mediterranean Sea*, edited by Borzelli, G. L. E., Gačić, M., Lionello, P., and Paolalanotte-Rizzoli, pp. 75–83, John Wiley & Sons, Inc., <http://onlinelibrary.wiley.com/doi/10.1002/9781118847572.ch6/summary>, 2014.
- 1150 Rohling, E. J.: Shoaling of the Eastern Mediterranean Pycnocline due to reduction of excess evaporation: Implications for sapropel formation, *Paleoceanography*, 6, 747–753, doi:10.1029/91PA02455, <http://onlinelibrary.wiley.com/doi/10.1029/91PA02455/abstract>, 1991.
- Rohling, E. J.: Review and new aspects concerning the formation of eastern Mediterranean sapropels, *Marine Geology*, 122, 1–28, doi:10.1016/0025-3227(94)90202-X, <http://www.sciencedirect.com/science/article/pii/002532279490202X>, 1994.
- 1155 Rossignol-Strick, M., Nesteroff, W., Olive, P., and Vergnaud-Grazzini, C.: After the deluge: Mediterranean stagnation and sapropel formation, *Nature*, 295, 105–110, doi:10.1038/295105a0, <http://www.nature.com/nature/journal/v295/n5845/abs/295105a0.html>, 1982.
- 1160 Royer, J.-F., Cariolle, D., Chauvin, F., Déqué, M., Douville, H., Hu, R.-M., Planton, S., Rascol, A., Ricard, J.-L., Salas Y Melia, D., Sevault, F., Simon, P., Somot, S., Tyteca, S., Terray, L., and Valcke, S.: Simulation des changements climatiques au cours du XXI<sup>e</sup> siècle incluant l’ozone stratosphérique, *Comptes Rendus Geoscience*, 334, 147–154, doi:10.1016/S1631-0713(02)01728-5, <http://www.sciencedirect.com/science/article/pii/S1631071302017285>, 2002.
- 1165 Ruti, P. M., Somot, S., Giorgi, F., Dubois, C., Flaounas, E., Obermann, A., Dell’Aquila, A., Pisacane, G., Harzallah, A., Lombardi, E., Ahrens, B., Akhtar, N., Alias, A., Arsouze, T., Aznar, R., Bastin, S., Bartholy, J., Béranger, K., Beuvier, J., Bouffies-Cloch  , S., Brauch, J., Cabos, W., Calmanti, S., Calvet, J.-C., Carillo, A., Conte, D., Coppola, E., Djurdjevic, V., Drobinski, P., Elizalde-Arellano, A., Gaertner, M., Gal  n, P., Gallardo, C., Gualdi, S., Goncalves, M., Jorba, O., Jord  , G., L’Heveder, B., Lebeaupin-Brossier, C., Li, L., Liguori, G., Lionello, P., Maci  s, D., Nabat, P.,   nol, B., Raikovic, B., Ramage, K., Sevault, F., Sannino, G., Struglia, M. V., Sanna, A., Torma, C., and Vervatis, V.: Med-CORDEX Initiative for Mediterranean Climate Studies, *Bulletin of the American Meteorological Society*, 97, 1187–1208, doi:10.1175/BAMS-D-14-00176.1, <https://journals.ametsoc.org/doi/abs/10.1175/BAMS-D-14-00176.1>, 2015.
- 1170 Sanchez-Gomez, E., Somot, S., and Mariotti, A.: Future changes in the Mediterranean water budget projected by an ensemble of regional climate models, *Geophysical Research Letters*, 36, L21401, doi:10.1029/2009GL040120, <http://onlinelibrary.wiley.com/doi/10.1029/2009GL040120/abstract>, 2009.
- 1175 Santinelli, C., Ibello, V., Lavezza, R., Civitarese, G., and Seritti, A.: New insights into C, N and P stoichiometry in the Mediterranean Sea: The Adriatic Sea case, *Continental Shelf Research*, 44, 83–93, doi:10.1016/j.csr.2012.02.015, <http://www.sciencedirect.com/science/article/pii/S0278434312000519>, 2012.
- 1180 Schaap, D. M. and Lowry, R. K.: SeaDataNet – Pan-European infrastructure for marine and ocean data management: unified access to distributed data sets, *International Journal of Digital Earth*, 3, 50–69, doi:10.1080/17538941003660974, <http://www.tandfonline.com/doi/abs/10.1080/17538941003660974>, 2010.

- 1185 Sevault, F., Somot, S., Alias, A., Dubois, C., Lebeaupin-Brossier, C., Nabat, P., Adloff, F., Déqué, M., and  
Decharme, B.: A fully coupled Mediterranean regional climate system model: design and evaluation of the  
ocean component for the 1980–2012 period, *Tellus A*, 66, doi:10.3402/tellusa.v66.23967, <http://www.tellusa.net/index.php/tellusa/article/view/23967>, 2014.
- Somot, S., Sevault, F., and Déqué, M.: Transient climate change scenario simulation of the Mediterranean Sea  
1190 for the twenty-first century using a high-resolution ocean circulation model, *Climate Dynamics*, 27, 851–879,  
doi:10.1007/s00382-006-0167-z, <http://link.springer.com/10.1007/s00382-006-0167-z>, 2006.
- Soto-Navarro, J., Somot, S., Sevault, F., Beuvier, J., Criado-Aldeanueva, F., García-Lafuente, J., and  
Béranger, K.: Evaluation of regional ocean circulation models for the Mediterranean Sea at the Strait of  
Gibraltar: volume transport and thermohaline properties of the outflow, *Climate Dynamics*, 44, 1277–1292,  
1195 doi:10.1007/s00382-014-2179-4, <https://link.springer.com/article/10.1007/s00382-014-2179-4>, 2015.
- Spillman, C. M., Imberger, J., Hamilton, D. P., Hipsey, M. R., and Romero, J. R.: Modelling the effects of Po  
River discharge, internal nutrient cycling and hydrodynamics on biogeochemistry of the Northern Adriatic  
Sea, *Journal of Marine Systems*, 68, 167–200, doi:10.1016/j.jmarsys.2006.11.006, <http://www.sciencedirect.com/science/article/pii/S0924796306003459>, 2007.
- 1200 Takahashi, T., Broecker, W. S., and Langer, S.: Redfield ratio based on chemical data from isopycnal surfaces,  
*Journal of Geophysical Research: Oceans* (1978–2012), 90, 6907–6924, doi:10.1029/JC090iC04p06907,  
<http://onlinelibrary.wiley.com/doi/10.1029/JC090iC04p06907/abstract>, 1985.
- Taylor, K. E., Stouffer, R. J., and Meehl, G. A.: An Overview of CMIP5 and the Experiment Design, *Bulletin  
of the American Meteorological Society*, 93, 485–498, doi:10.1175/BAMS-D-11-00094.1, <http://journals.ametsoc.org/doi/abs/10.1175/BAMS-D-11-00094.1>, 2012.
- 1205 Theocharis, A., Nittis, K., Kontoyiannis, H., Papageorgiou, E., and Balopoulos, E.: Climatic changes in  
the Aegean Sea influence the eastern Mediterranean thermohaline circulation (1986–1997), *Geophysical  
Research Letters*, 26, 1617–1620, doi:10.1029/1999GL900320, <http://onlinelibrary.wiley.com/doi/10.1029/1999GL900320/abstract>, 1999.
- 1210 Vadsaria, T., Ramstein, G., Li, L., and Dutay, J.-C.: Sensibilité d’un modèle océan-atmosphère (LMDz-  
NEMOMED8) à un flux d’eau douce : cas du dernier épisode de sapropèle en mer Méditerranée, *Quaternaire*,  
28, 2017.
- Velaoras, D. and Lascaratos, A.: North-Central Aegean Sea surface and intermediate water masses and  
their role in triggering the Eastern Mediterranean Transient, *Journal of Marine Systems*, 83, 58–66,  
1215 doi:10.1016/j.jmarsys.2010.07.001, wOS:000282548300005, 2010.
- Yogev, T., Rahav, E., Bar-Zeev, E., Man-Aharonovich, D., Stambler, N., Kress, N., Béjà, O., Mulholland,  
M. R., Herut, B., and Berman-Frank, I.: Is dinitrogen fixation significant in the Levantine Basin, East  
Mediterranean Sea?, *Environmental Microbiology*, 13, 854–871, doi:10.1111/j.1462-2920.2010.02402.x,  
<http://onlinelibrary.wiley.com/doi/10.1111/j.1462-2920.2010.02402.x/abstract>, 2011.

| Name    | Dynamics (NEMO years) | Buffer zone concentrations | River inputs |
|---------|-----------------------|----------------------------|--------------|
| CTRL    | 1966–1981             | 1966–1981                  | 1966–1981    |
| CTRL_R  | 1966–1981             | 1966–1981                  | 1980–2099    |
| CTRL_RG | 1966–1981             | 1980–2099                  | 1980–2099    |
| HIS/A2  | 1980–2099             | 1980–2099                  | 1980–2099    |

**Table 1.** Description of the simulations. The years indicate the forcing years throughout the 120 years of simulation. The cycles are repeated in the CTRL simulations.

| Simulation | Period    | Whole Med. | Western    | Eastern     | Ionian-Levantine | Adriatic   | Aegean      | Atlantic buffer zone |
|------------|-----------|------------|------------|-------------|------------------|------------|-------------|----------------------|
| HIS/A2     | 1980–1999 | 551        | 241        | 310         | 305              | 1.5        | 4.0         | 535                  |
|            | 2030–2049 | 570 (+3.4) | 240 (0)    | 329 (+6.1)  | 324 (+6.2)       | 1.4 (0)    | 3.6 (-10)   | 543 (+1.5)           |
|            | 2080–2099 | 598 (+8.5) | 251 (+4.1) | 346 (+11.6) | 341 (+11.8)      | 1.5 (0)    | 3.5 (-12.5) | 562 (+5.0)           |
| CTRL       | 1980–1999 | 545        | 238        | 307         | 302              | 1.6        | 4.0         | 532                  |
|            | 2030–2049 | 553 (+1.5) | 238 (0)    | 314 (+2.3)  | 309 (+2.3)       | 1.6 (0)    | 4.2 (+5.0)  | 532 (0)              |
|            | 2080–2099 | 560 (+2.6) | 241 (+1.3) | 319 (+3.9)  | 313 (+3.6)       | 1.7 (+6.3) | 4.2 (+5.0)  | 532 (0)              |
| CTRL_R     | 1980–1999 | 547        | 239        | 309         | 303              | 1.5        | 4.2         | 534                  |
|            | 2030–2049 | 536 (-2.0) | 232 (-2.9) | 304 (-1.6)  | 299 (-1.3)       | 1.4 (-6.7) | 3.5 (-17)   | 534 (0)              |
|            | 2080–2099 | 538 (-1.6) | 230 (-3.8) | 309 (0)     | 303 (0)          | 1.5 (0)    | 3.7 (-12)   | 534 (0)              |
| CTRL_RG    | 1980–1999 | 548        | 239        | 309         | 303              | 1.5        | 4.2         | 535                  |
|            | 2030–2049 | 536 (-2.2) | 233 (-2.5) | 303 (-1.9)  | 298 (-1.7)       | 1.4 (-6.7) | 3.5 (-17)   | 544 (+1.7)           |
|            | 2080–2099 | 540 (-1.5) | 235 (-1.7) | 306 (-1.0)  | 301 (-0.7)       | 1.4 (-6.7) | 3.6 (-14)   | 562 (+5.0)           |

**Table 2.** Simulated integrated phosphate content ( $10^9$  mol) over 20 years periods in the Mediterranean sub-basins in the different simulations. Basins are the same as defined in Fig.2 of Adloff et al. (2015), with the eastern basin including the Ionian, Levantine, Adriatic and Aegean subbasins. Values in parenthesis indicate the percentage difference from the 1980–1999 period.

| Simulation | Period    | Whole Med.          | Western            | Eastern            | Ionian-Levantine   | Adriatic           | Aegean            | Atlantic buffer z  |
|------------|-----------|---------------------|--------------------|--------------------|--------------------|--------------------|-------------------|--------------------|
| HIS/A2     | 1980–1999 | 13400               | 5520               | 7890               | 7690               | 66.9               | 132               | 8091               |
|            | 2030–2049 | 13800 <u>(+3.0)</u> | 5450 <u>(-1.3)</u> | 8350 <u>(+5.8)</u> | 8100 <u>(+5.3)</u> | 88.5 <u>(+32)</u>  | 163 <u>(+23)</u>  | 8230 <u>(+1.7)</u> |
|            | 2080–2099 | 14700 <u>(+9.7)</u> | 5750 <u>(+4.2)</u> | 8920 <u>(+13)</u>  | 8650 <u>(+12)</u>  | 98.3 <u>(+47)</u>  | 164 <u>(+24)</u>  | 8510 <u>(+5.2)</u> |
| CTRL       | 1980–1999 | 13500               | 5530               | 7970               | 7760               | 66.2               | 144               | 8050               |
|            | 2030–2049 | 12900 <u>(-4.4)</u> | 5320 <u>(-3.8)</u> | 7610 <u>(-4.5)</u> | 7420 <u>(-4.4)</u> | 61.7 <u>(-6.8)</u> | 131 <u>(-9.0)</u> | 8050 <u>(0)</u>    |
|            | 2080–2099 | 12500 <u>(-7.4)</u> | 5170 <u>(-6.5)</u> | 7330 <u>(-8.0)</u> | 7150 <u>(-7.9)</u> | 58.7 <u>(-11)</u>  | 123 <u>(-15)</u>  | 8050 <u>(0)</u>    |
| CTRL_R     | 1980–1999 | 13300               | 5470               | 7870               | 7760               | 66.8               | 138               | 8070               |
|            | 2030–2049 | 13300 <u>(0)</u>    | 5250 <u>(-4.0)</u> | 8020 <u>(+1.9)</u> | 7770 <u>(+0.1)</u> | 88.0 <u>(+32)</u>  | 162 <u>(+17)</u>  | 8070 <u>(0)</u>    |
|            | 2080–2099 | 13700 <u>(+3.0)</u> | 5300 <u>(-3.1)</u> | 8440 <u>(+7.2)</u> | 8170 <u>(+5.3)</u> | 94.2 <u>(+41)</u>  | 177 <u>(+28)</u>  | 8080 <u>(+0.1)</u> |
| CTRL_RG    | 1980–1999 | 13300               | 5480               | 7870               | 7760               | 66.8               | 138               | 8090               |
|            | 2030–2049 | 13300 <u>(0)</u>    | 5270 <u>(-3.8)</u> | 8010 <u>(+1.8)</u> | 7760 <u>(0)</u>    | 88.0 <u>(+32)</u>  | 162 <u>(+17)</u>  | 8080 <u>(-0.1)</u> |
|            | 2080–2099 | 13800 <u>(+3.8)</u> | 5390 <u>(-1.6)</u> | 8430 <u>(+7.1)</u> | 8160 <u>(+5.2)</u> | 94.3 <u>(+41)</u>  | 177 <u>(+28)</u>  | 8080 <u>(-0.1)</u> |

**Table 3.** Simulated integrated nitrate content ( $10^9$  mol) over 20 years periods in the Mediterranean sub-basins in the different simulations. Basins are the same as defined in Fig.2 of Adloff et al. (2015), with the eastern basin including the Ionian, Levantine, Adriatic and Aegean subbasins. Values in parenthesis indicate the percentage difference from the 1980–1999 period.

| Simulation | Period    | Whole Med.          | Western             | Eastern             | Ionian-Levantine    | Adriatic          | Aegean             | Atlantic buffer z  |
|------------|-----------|---------------------|---------------------|---------------------|---------------------|-------------------|--------------------|--------------------|
| HIS/A2     | 1980–1999 | 25700               | 9680                | 16000               | 13500               | 830               | 1720               | 3210               |
|            | 2030–2049 | 23800 <u>(-7.4)</u> | 8980 <u>(-7.2)</u>  | 14800 <u>(-7.5)</u> | 12700 <u>(-5.9)</u> | 720 <u>(-13)</u>  | 1440 <u>(-16)</u>  | 3280 <u>(+2.2)</u> |
|            | 2080–2099 | 23400 <u>(-8.9)</u> | 9180 <u>(-5.1)</u>  | 14300 <u>(-11)</u>  | 12200 <u>(-9.6)</u> | 690 <u>(-17)</u>  | 1390 <u>(-19)</u>  | 3570 <u>(+11)</u>  |
| CTRL       | 1980–1999 | 27000               | 10200               | 16700               | 14200               | 880               | 1670               | 3180               |
|            | 2030–2049 | 27000 <u>(0)</u>    | 10200 <u>(0)</u>    | 16900 <u>(+1.2)</u> | 14300 <u>(+0.7)</u> | 890 <u>(+1.1)</u> | 1710 <u>(+2.4)</u> | 3180 <u>(0)</u>    |
|            | 2080–2099 | 26600 <u>(-1.5)</u> | 9980 <u>(-2.2)</u>  | 16600 <u>(-0.1)</u> | 14000 <u>(-1.4)</u> | 880 <u>(0)</u>    | 1690 <u>(+1.2)</u> | 3180 <u>(0)</u>    |
| CTRL_R     | 1980–1999 | 27000               | 10300               | 16700               | 14100               | 875               | 1720               | 3210               |
|            | 2030–2049 | 26800 <u>(-0.7)</u> | 10100 <u>(-1.9)</u> | 16700 <u>(0)</u>    | 14300 <u>(+1.4)</u> | 780 <u>(-12)</u>  | 1610 <u>(-6.4)</u> | 3210 <u>(0)</u>    |
|            | 2080–2099 | 26400 <u>(-2.2)</u> | 9940 <u>(-3.5)</u>  | 16500 <u>(-1.2)</u> | 14100 <u>(0)</u>    | 760 <u>(-13)</u>  | 1600 <u>(-7.0)</u> | 3220 <u>(0.3)</u>  |
| CTRL_RG    | 1980–1999 | 27000               | 10300               | 16700               | 14100               | 875               | 1720               | 3230               |
|            | 2030–2049 | 26900 <u>(-0.4)</u> | 10200 <u>(-1.0)</u> | 16700 <u>(0)</u>    | 14300 <u>(+1.4)</u> | 780 <u>(-12)</u>  | 1600 <u>(-7.0)</u> | 3260 <u>(+0.9)</u> |
|            | 2080–2099 | 26700 <u>(-1.1)</u> | 10200 <u>(-1.0)</u> | 16500 <u>(-1.2)</u> | 14100 <u>(0)</u>    | 750 <u>(-14)</u>  | 1600 <u>(-7.0)</u> | 3420 <u>(+5.9)</u> |

**Table 4.** Simulated integrated chlorophyll production ( $10^9$  mol) over 20 years periods in the Mediterranean sub-basins in the different simulations. Basins are the same as defined in Fig.2 of Adloff et al. (2015), with the eastern basin including the Ionian, Levantine, Adriatic and Aegean subbasins. Values in parenthesis indicate the percentage difference from the 1980–1999 period.



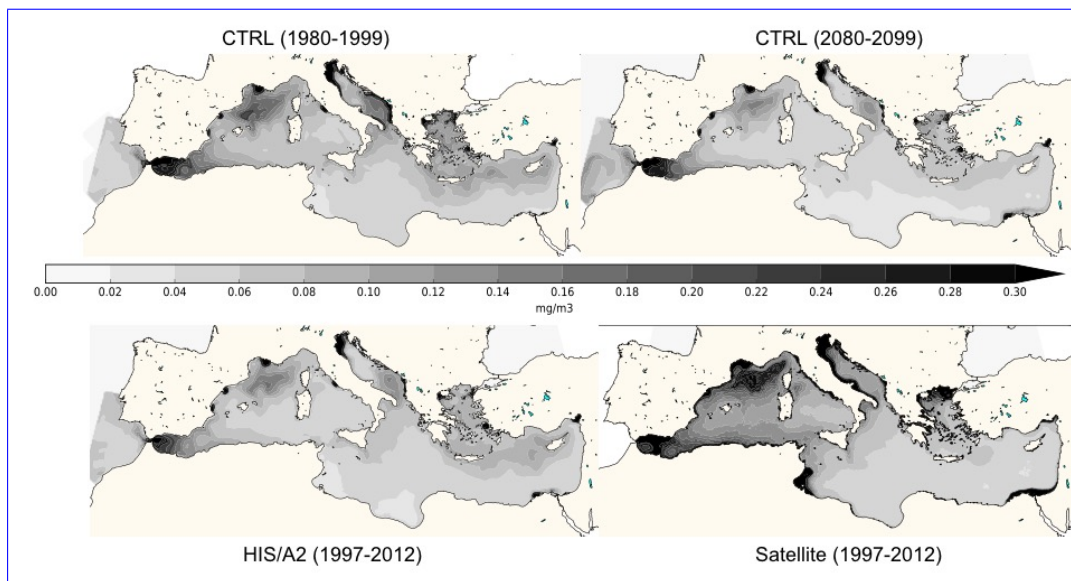

**Figure 1.** Average surface chlorophyll concentration from the CTRL (top, left: 1980–1999 right: 2080–2099) and HIS/A2 (bottom left) simulations, and from satellite estimations (MyOcean Dataset 1997–2012, bottom right).

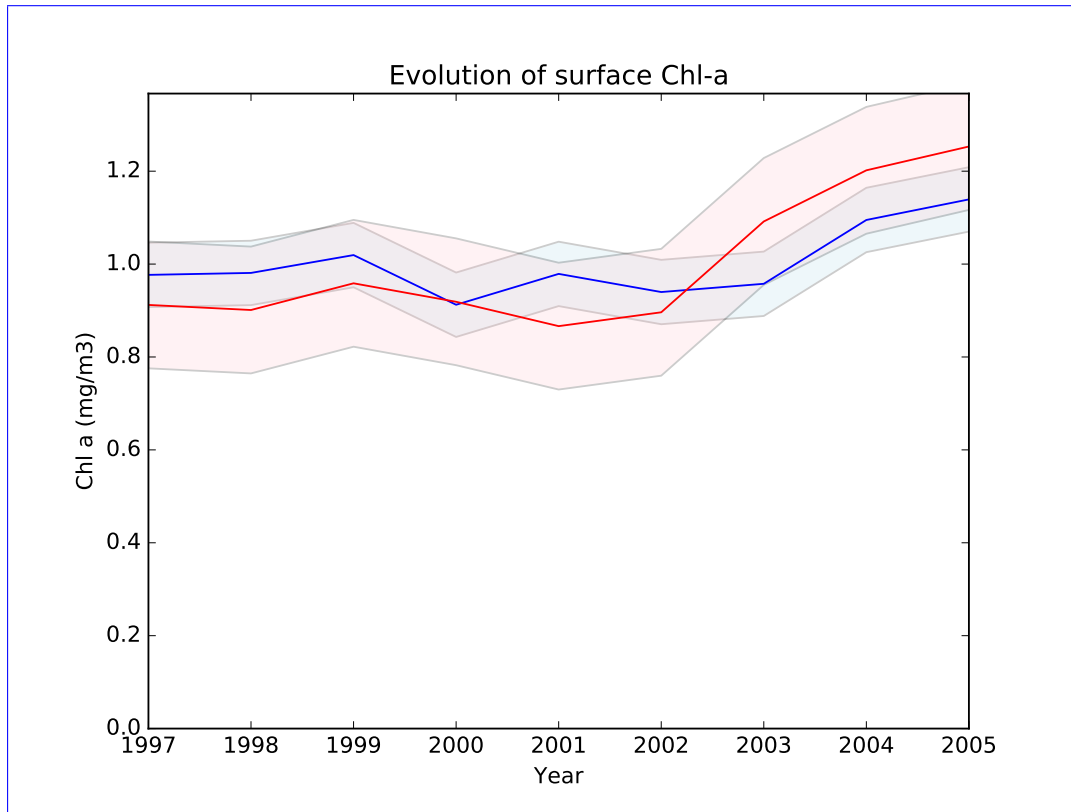

**Figure 2.** Average surface chlorophyll concentration from the HIS/A2 simulation in blue and from the SeaWiFS satellite data (Bosc et al., 2004) in red over the period 1997–2005. Shaded colors represent the standard deviations. Values are normalized by dividing by the average chlorophyll concentration over the period.

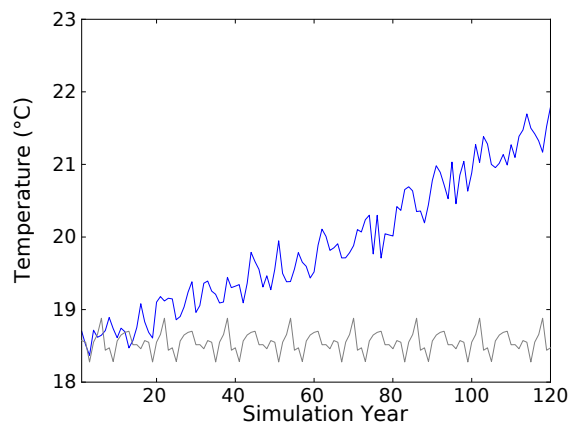

(a) Average Mediterranean SST

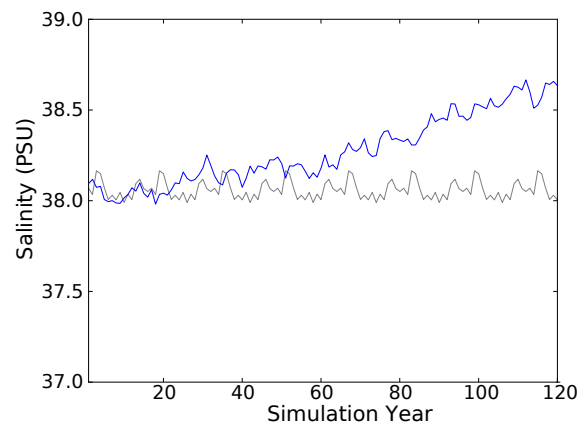

(b) Average Mediterranean SSS

**Figure 3.** Evolution of average Mediterranean SST (left) and SSS (right) in CTRL (grey line) and HIS/A2 (blue line) simulations.

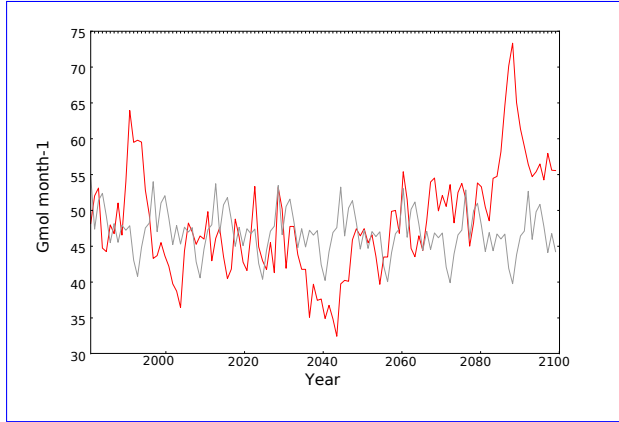

(a) Total incoming nitrate

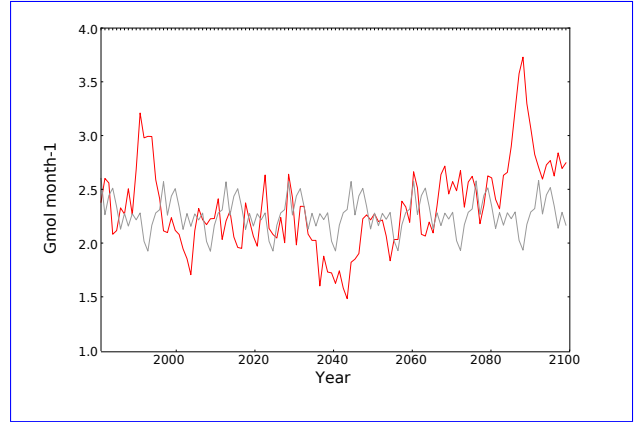

(b) Total incoming phosphate

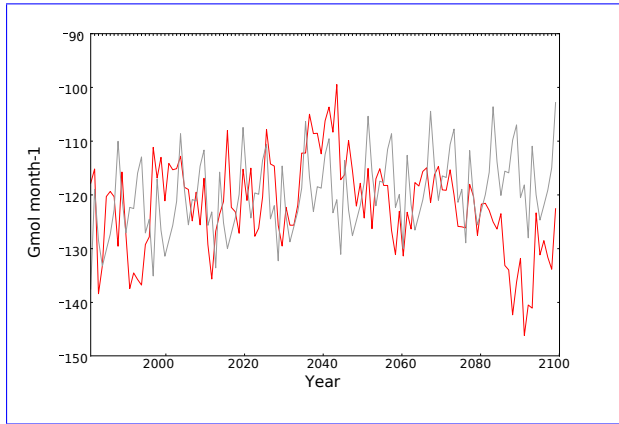

(c) Total outgoing nitrate

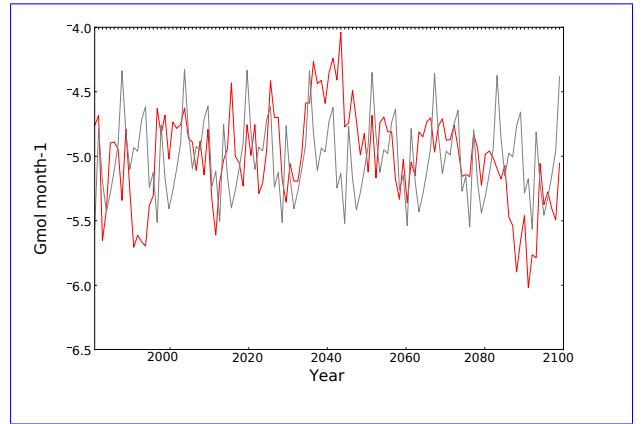

(d) Total outgoing phosphate

**Figure 4.** Evolution of total incoming (top) and outgoing (bottom) fluxes of nitrate and phosphate ( $10^9 \text{ mol month}^{-1}$ ) through the Strait of Gibraltar in CTRL (grey line) and HIS/A2 (red line). Negative values indicate outgoing fluxes of nutrients.

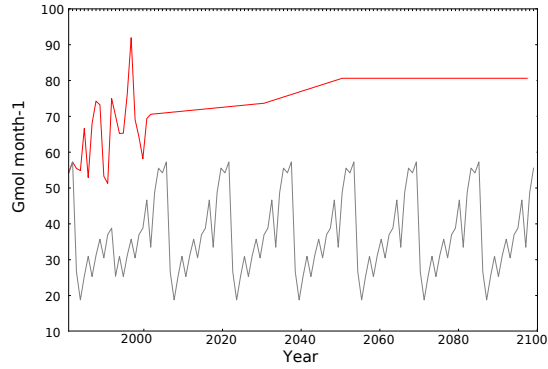

(a) Total river discharge of nitrate

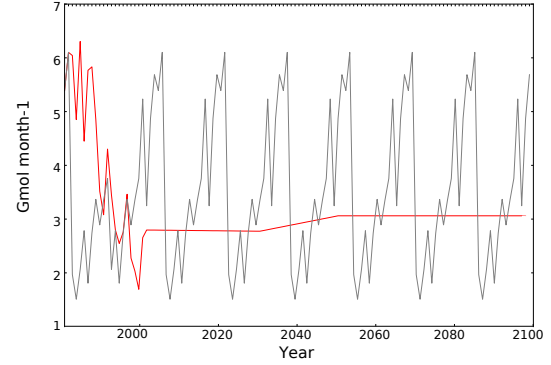

(b) Total river discharge of phosphate

**Figure 5.** Evolution of total river discharge fluxes of nitrate and phosphate ( $10^9 \text{mol month}^{-1}$ ) to the Mediterranean Sea in CTRL (grey line) and HIS/A2 (red line).

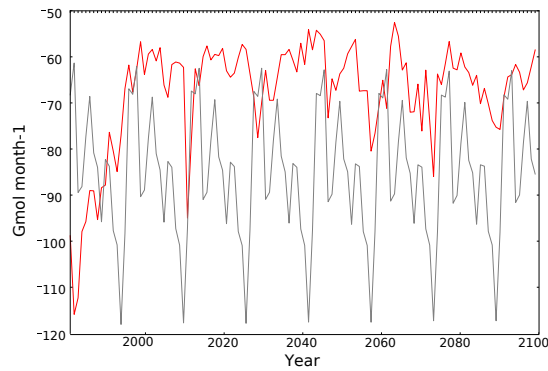

(a) Total nitrogen sedimentation

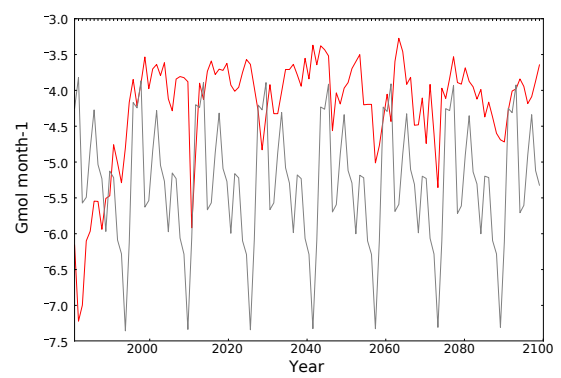

(b) Total phosphorus sedimentation

**Figure 6.** Evolution of total sedimentation fluxes of N and P ( $10^9 \text{mol month}^{-1}$ ) in the Mediterranean Sea in CTRL (grey line) and HIS/A2 (red line). Negative fluxes indicate that the nutrients are exiting the Mediterranean waters.

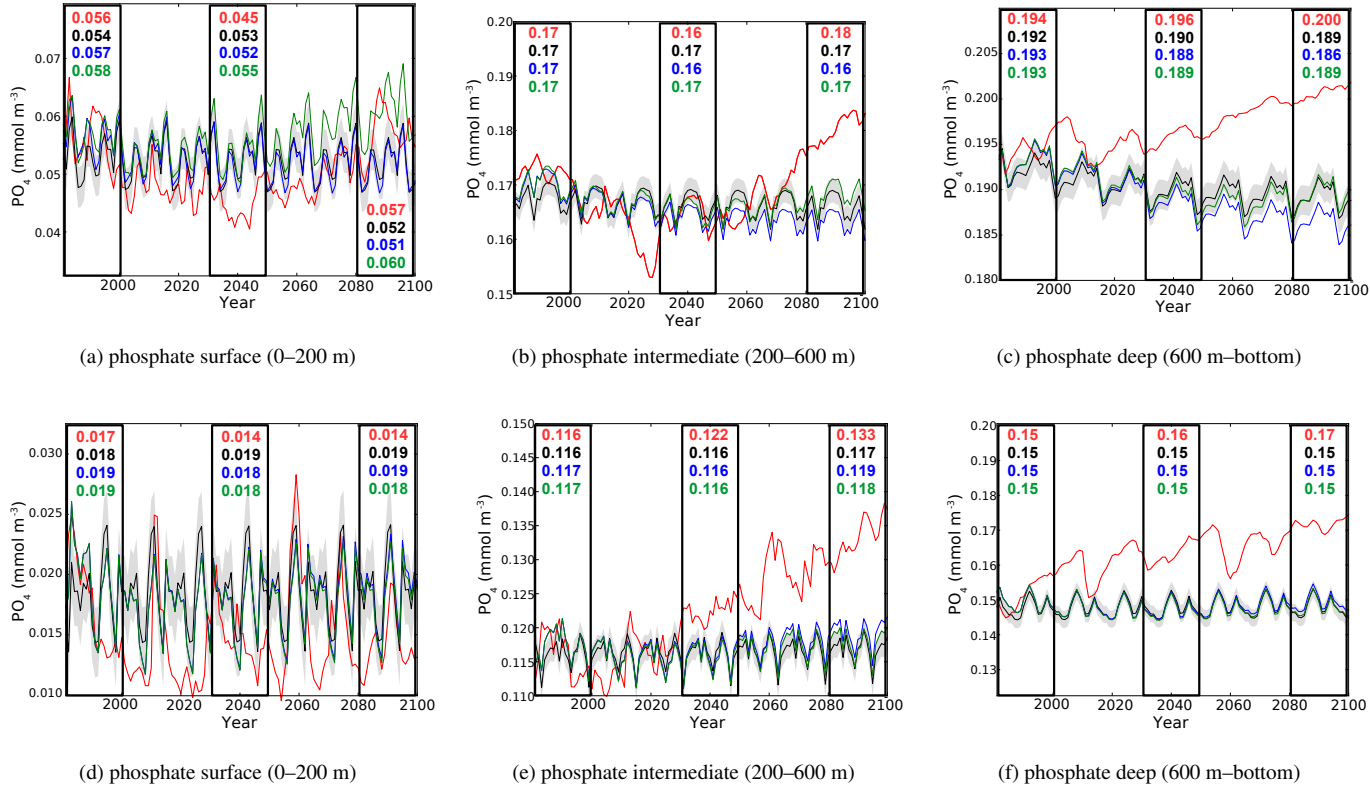

**Figure 7.** Evolution of yearly average phosphate concentration ( $10^{-3} \text{ mol m}^{-3}$ ) in the surface (left), intermediate (middle) and bottom (right) layers in the western (top) and eastern (bottom) basin. Black line Red lines represent the HIS/A2 simulation, grey dashed line black lines represent the CTRL (with standard deviation), dashed blue and green lines represent the CTRL\_R and CTRL\_RG simulations respectively. Colored numbers in the shaded areas represent the average concentrations in the corresponding simulations for the shaded time periods.

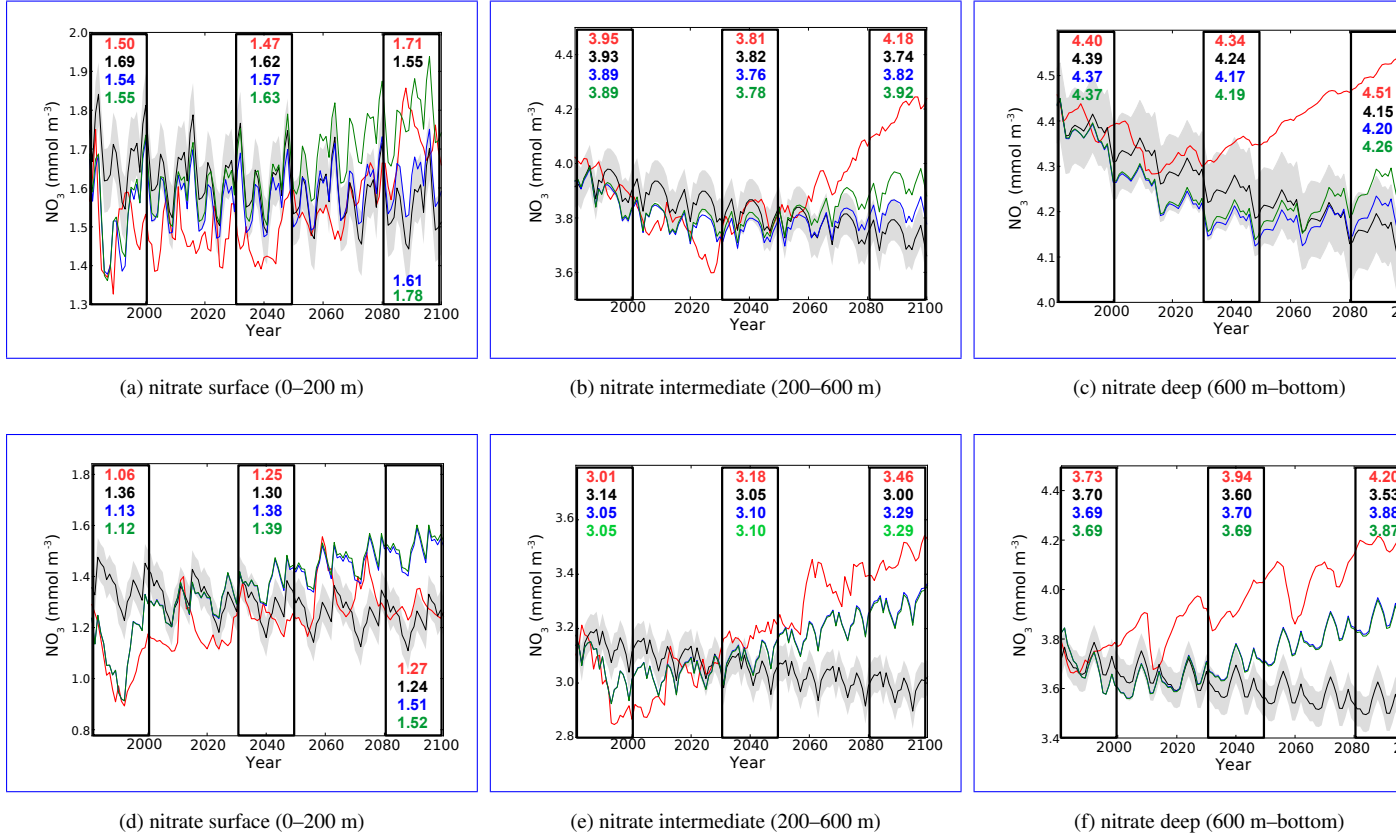

**Figure 8.** Evolution of yearly average nitrate concentration ( $10^{-3} \text{ mol m}^{-3}$ ) in the surface (left), intermediate (middle) and bottom (right) layers in the western (top) and eastern (bottom) basins. Black line-Red lines represent the HIS/A2 simulation, grey-dashed-line-black lines represent the CTRL (with standard deviation), dashed-blue and green lines represent the CTRL\_R and CTRL\_RG simulations respectively. Colored numbers in the shaded areas represent the average concentrations in the corresponding simulations for the shaded time periods.

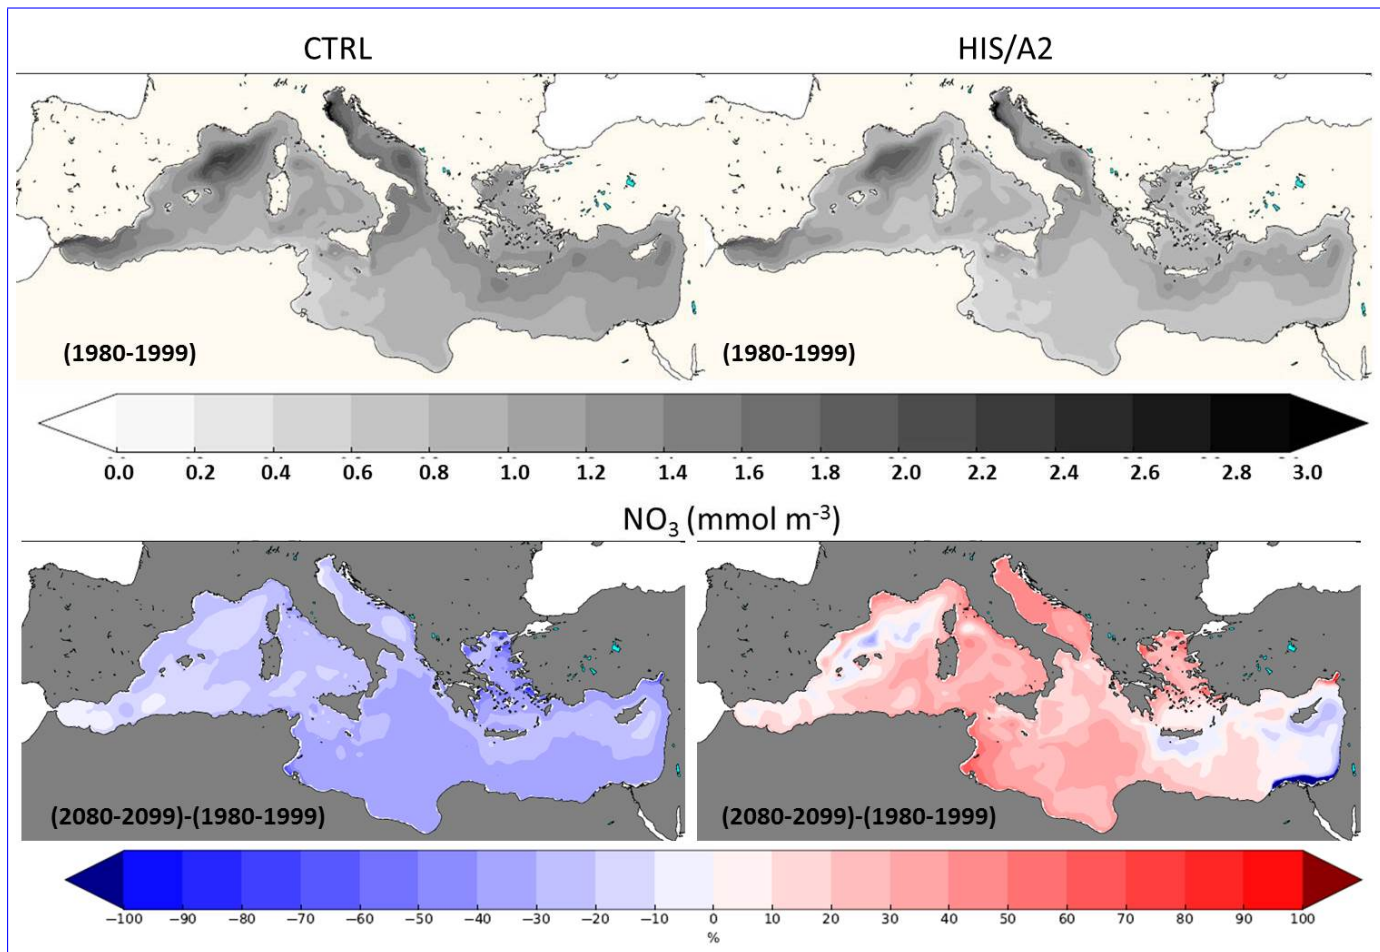

Evolution of total river discharge fluxes of nitrate and phosphate ( $10^9 \text{ mol month}^{-1}$ ) to the Mediterranean Sea in CTRL (grey line) and HIS/A2 (red line). The bottom maps show the relative difference (%) between the 2080–2099 and 1980–1999 periods.

Evolution of total sedimentation fluxes of N and P ( $10^9 \text{ mol month}^{-1}$ ) in the Mediterranean Sea 1980–1999 periods in CTRL (grey line) and HIS/A2 (red line).

Evolution of total river discharge fluxes of nitrate and phosphate ( $10^9 \text{ mol month}^{-1}$ ) to the Mediterranean Sea in CTRL (grey line) and HIS/A2 (red line). The bottom maps show the relative difference (%) between the 2080–2099 and 1980–1999 periods.

Evolution of total sedimentation fluxes of N and P ( $10^9 \text{ mol month}^{-1}$ ) in the Mediterranean Sea 1980–1999 periods in CTRL (grey line) and HIS/A2 (red line).

**Figure 9.** Evolution of total Gibraltar-incoming Present (1980–1999, top) and outgoing-interannual average surface (bottom 0–200 m) fluxes-concentrations of nitrate and phosphate ( $10^{-3} \text{ mol month}^{-1} \text{ m}^{-3}$ ) in the CTRL (grey line) and HIS/A2 (red line) simulations. Negative values indicate outgoing fluxes of nutrients.

Evolution of total river discharge fluxes of nitrate and phosphate ( $10^9 \text{ mol month}^{-1}$ ) to the Mediterranean Sea in CTRL (grey line) and HIS/A2 (red line). The bottom maps show the relative difference (%) between the 2080–2099 and 1980–1999 periods.

Evolution of total sedimentation fluxes of N and P ( $10^9 \text{ mol month}^{-1}$ ) in the Mediterranean Sea 1980–1999 periods in CTRL (grey line) and HIS/A2 (red line).



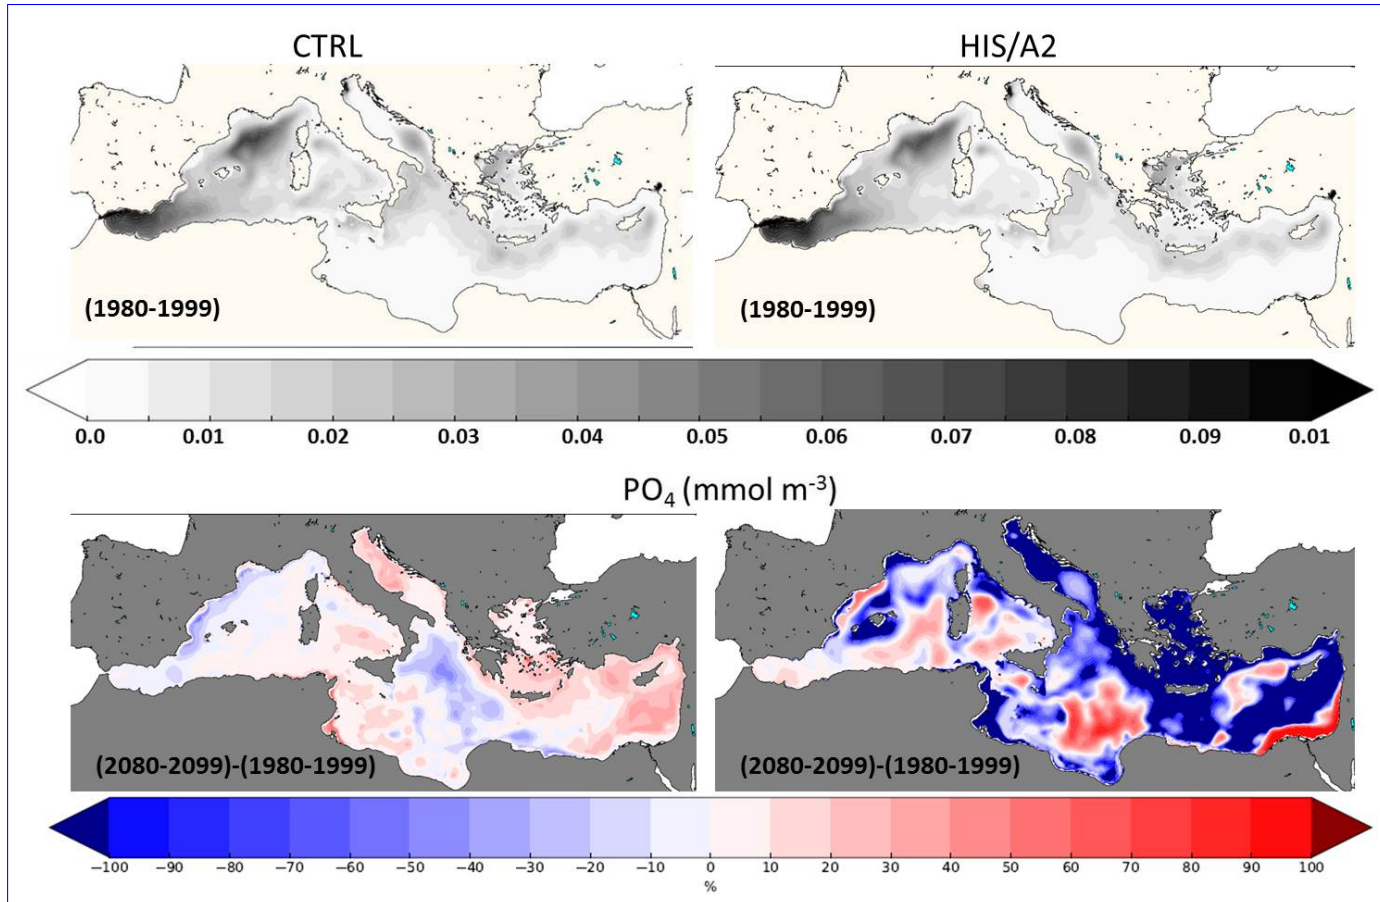

**Figure 10.** Present (1980–1999, left) and future (2080–2099, right) interannual average surface (0–200 m) concentrations of nitrate-phosphate ( $10^{-3} \text{mol m}^{-3}$ ) in the CTRL (topleft) and HIS/A2 (bottomright) simulations. Present The bottom maps show the relative difference (1980–1999, left in %) and future (2080–2099, right) interannual average surface (0–200m) concentrations of phosphate ( $10^{-3} \text{mol m}^{-3}$ ) in primary production between the 2080–2099 and the 1980–1999 periods in CTRL (topleft) and HIS/A2 (right) simulations.

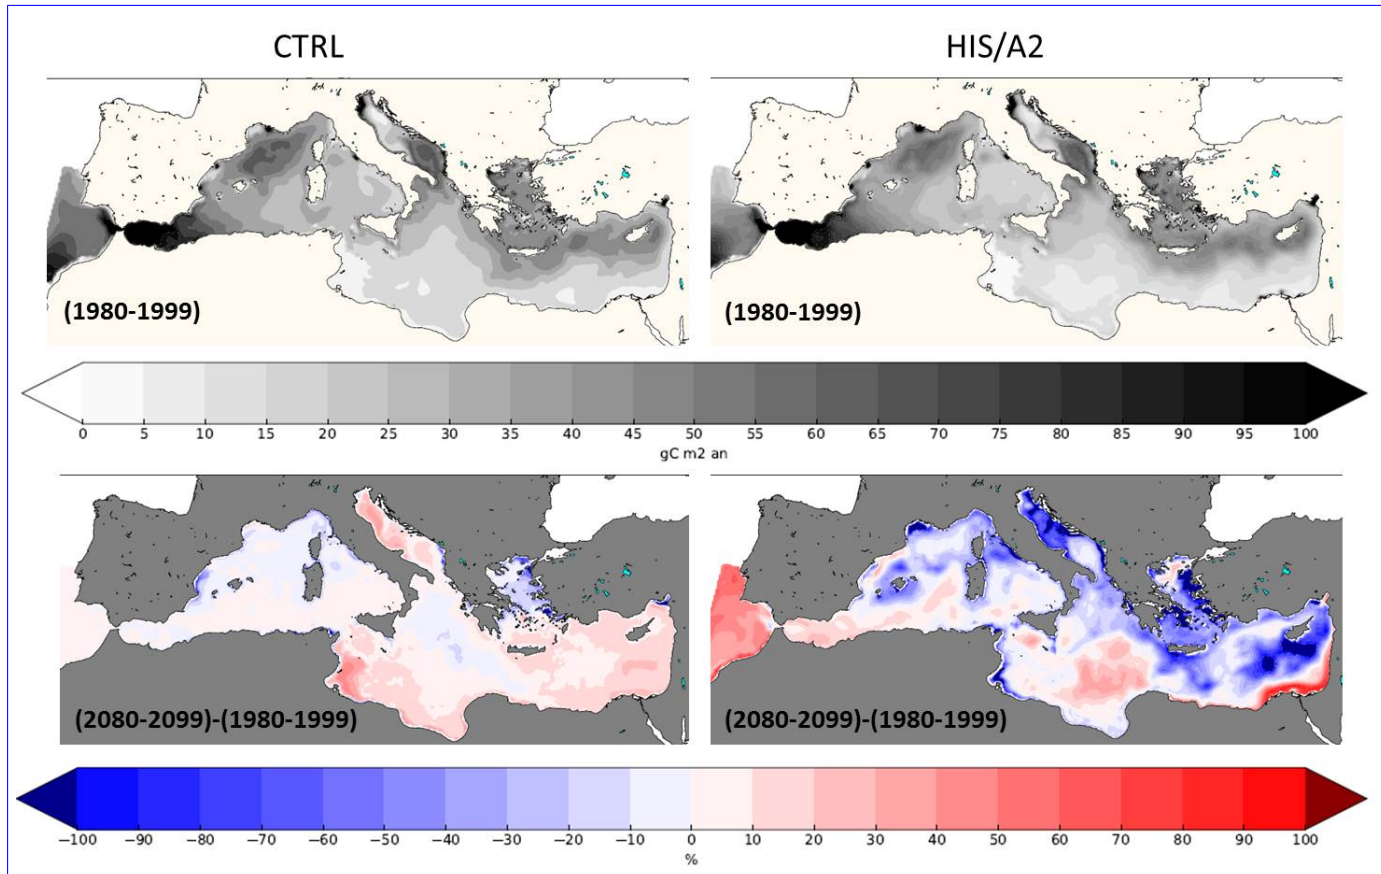

**Figure 11.** Present (1980–1999, [left](#)) and future (2080–2099, [right](#)) interannual average surface (0–200 m) integrated primary production (gC m<sup>-2</sup>) in the CTRL ([top left](#)) and HIS/A2 ([bottom right](#)) simulations. [The bottom maps show the relative difference \(in %\) in primary production between the 2080–2099 and the 1980–1999 periods in CTRL \(left\) and HIS/A2 \(right\).](#)

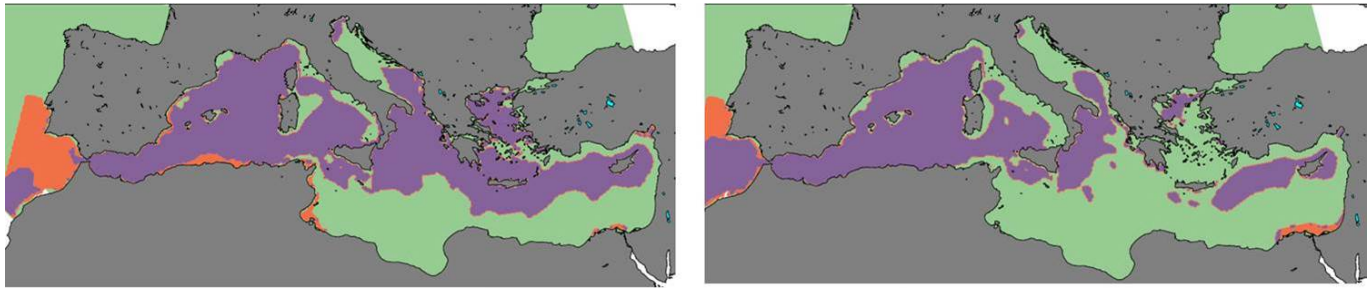

**Figure 12.** Present (1980–1999) and future (2080–2099) interannual average surface (0–200 m) limiting nutrient in the HIS/A2 simulation. N and P colimitation is considered when limitation factors for N and P differ by less than 1 %. Green zones are P-limited, Orange zones are N-Limited and purple zones are N and P co-limited.

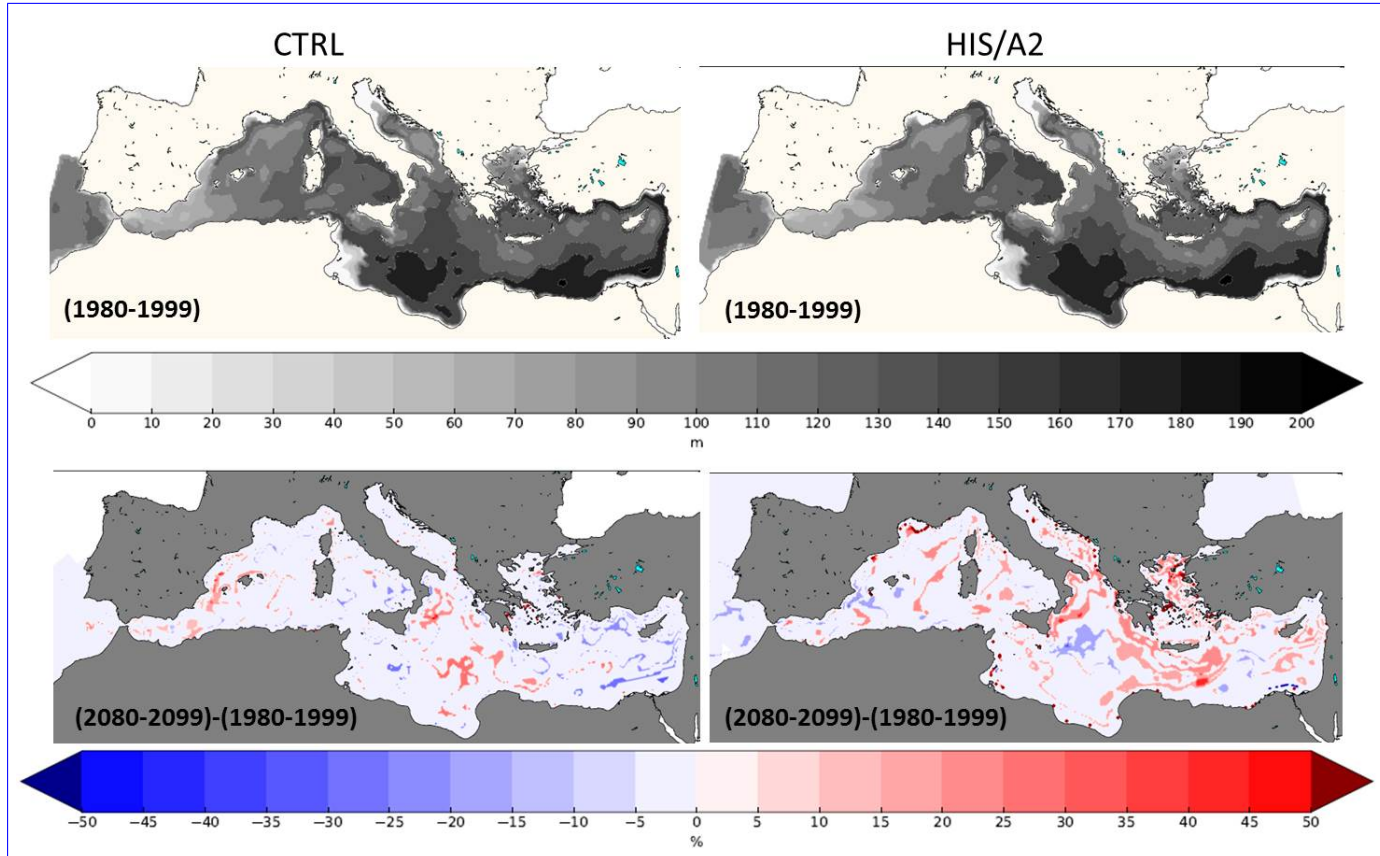

**Figure 13.** Present (left, 1980–1999) and future (right, 2080–2099) interannual average surface DCM (0–200 m) DCM depth in the scenario simulation CTRL (left) and HIS/A2 (right) simulations. The bottom maps show the relative difference (in %) in DCM between the 2080–2099 and the 1980–1999 periods in CTRL (left) and HIS/A2 (right).

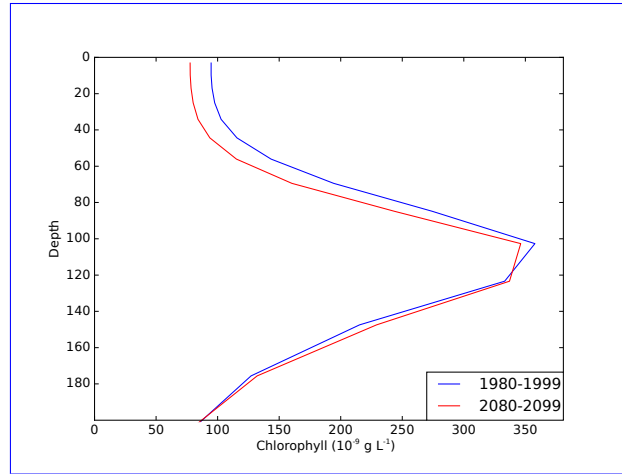

(a) DYFAMED

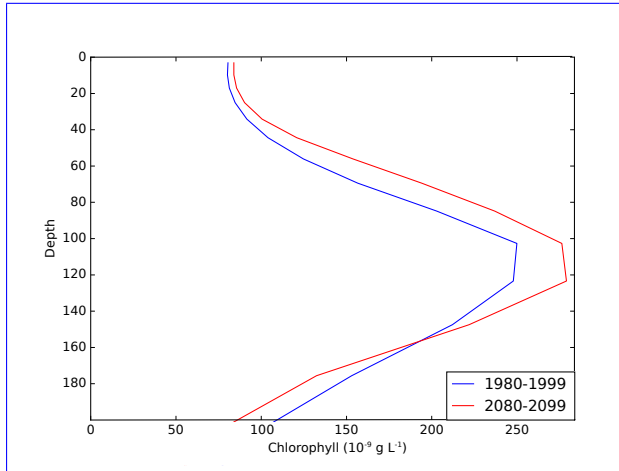

(b) Western basin

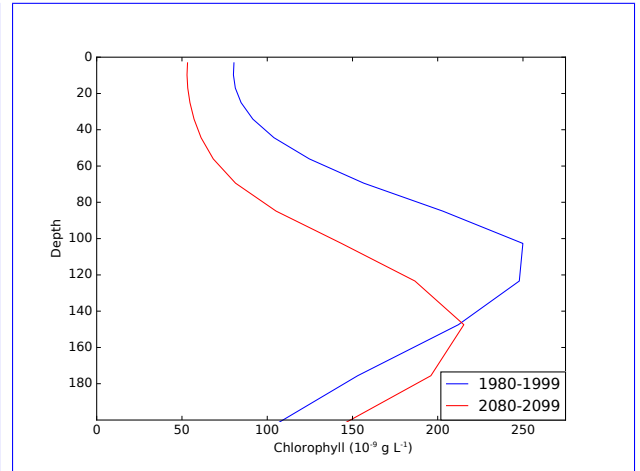

(c) Eastern basin

**Figure 14.** Present (1980–1999) and future (2080–2099) interannual average vertical profiles of total chlorophyll  $a$  ( $10^{-9} \text{ g L}^{-1}$ ) at the DYFAMED station and averaged profiles over the western and eastern (including Aegean and Adriatic) basins.

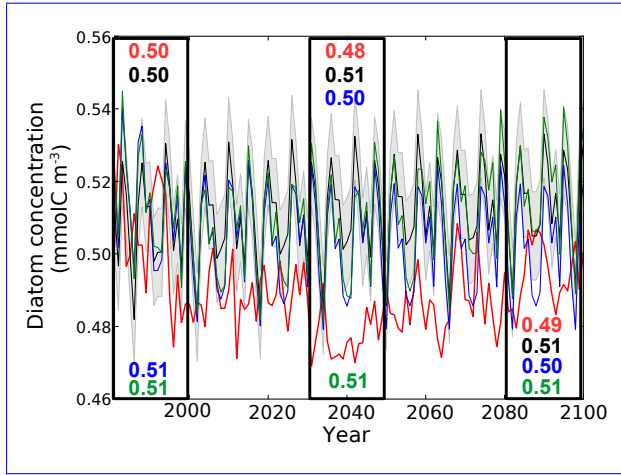

(a) Nanophytoplankton western basin

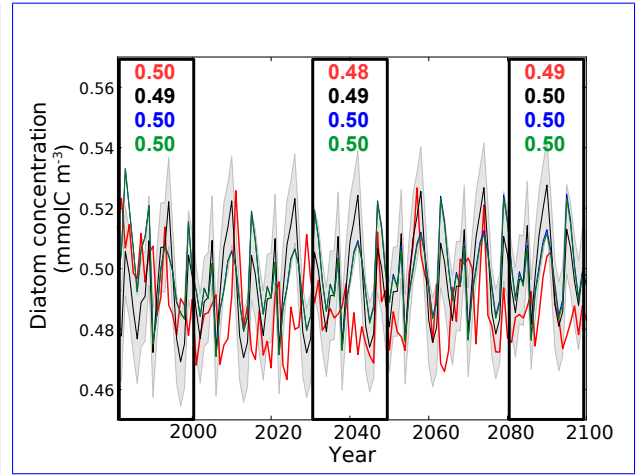

(b) Nanophytoplankton eastern basin

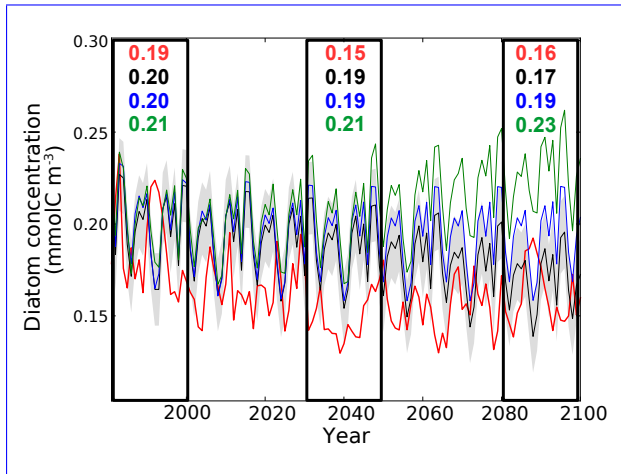

(c) Diatoms western basin

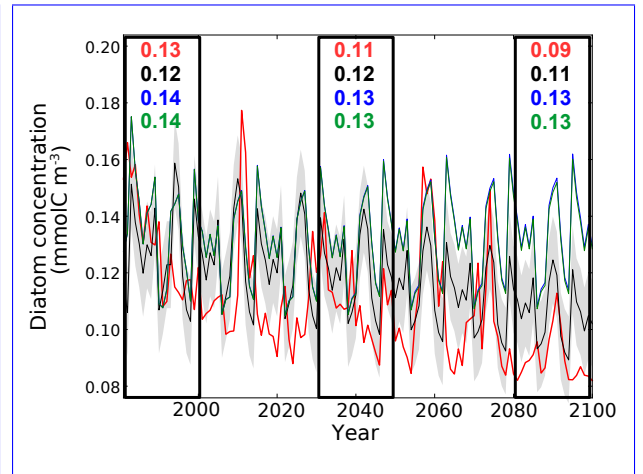

(d) Diatoms eastern basin

**Figure 15.** Evolution of yearly average nanophytoplankton and diatoms concentration ( $10^{-3} \text{ mol m}^{-3}$ ) in the surface layer of the western and eastern basin. ~~Black-Red~~ line represent the HIS/A2 simulation, ~~grey-dashed~~ ~~line-black lines~~ represent the CTRL (with standard deviation), ~~dashed-blue~~ and green lines represent the CTRL\_R and CTRL\_RG simulations respectively. Colored numbers in the shaded areas represent the average concentrations in the corresponding simulations for the shaded time periods.



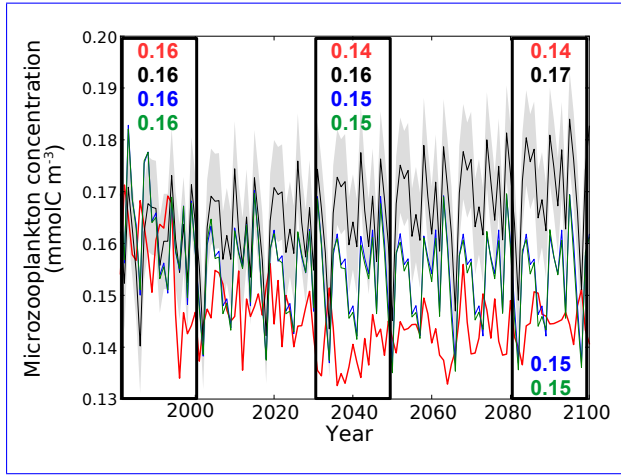

(a) Microzooplankton western basin

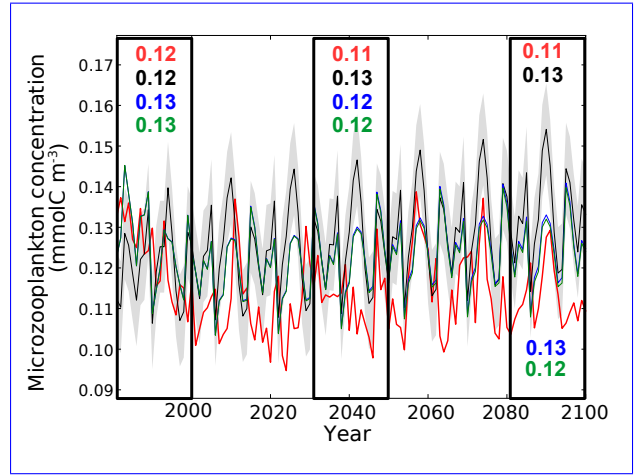

(b) Microzooplankton eastern basin

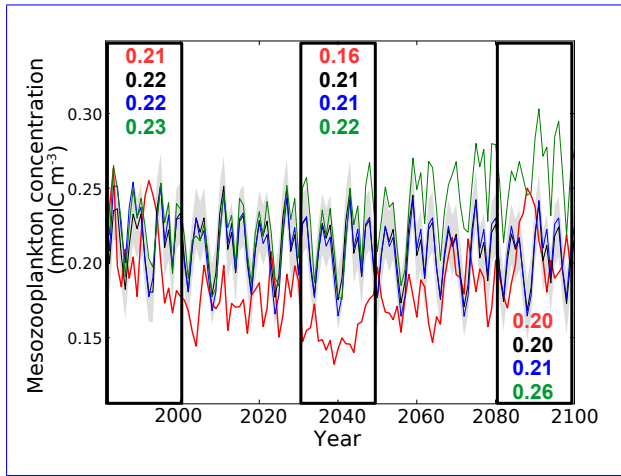

(c) Mesozooplankton western basin

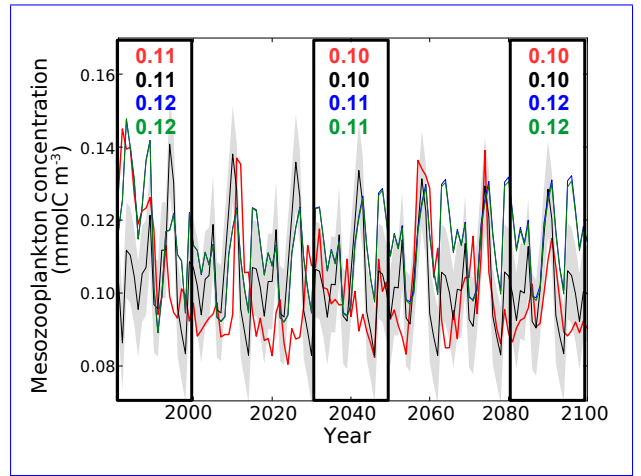

(d) Mesozooplankton eastern basin

**Figure 16.** Evolution of yearly average microzooplankton and mesozooplankton concentrations ( $10^{-3}\text{mol m}^{-3}$ ) in the surface layer of the western and eastern basins. Black line-Red lines represent the HIS/A2 simulation, grey dashed line-black lines represent the CTRL (with standard deviation), dashed-blue and green lines represent the CTRL\_R and CTRL\_RG simulations respectively. Colored numbers in the shaded areas represent the average concentrations in the corresponding simulations for the shaded time periods.

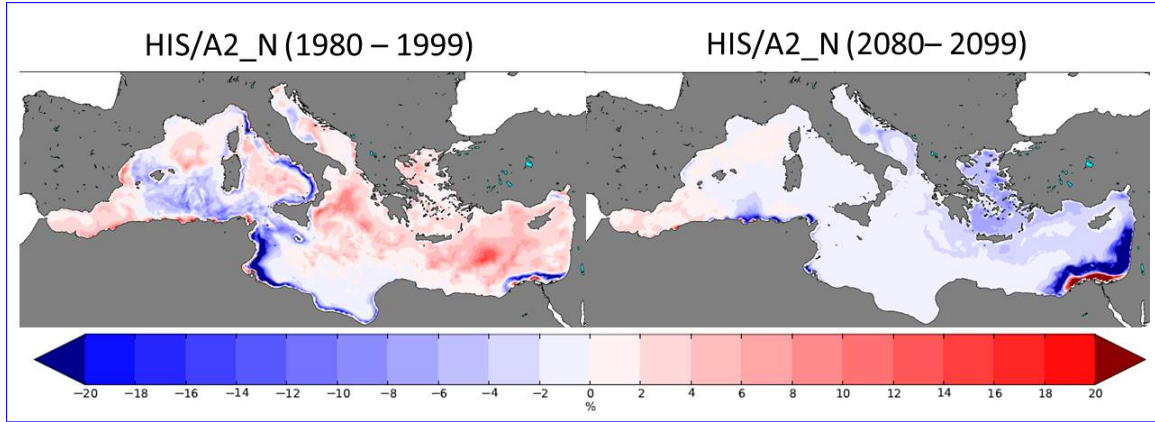

(a) Relative effects of total nitrogen deposition

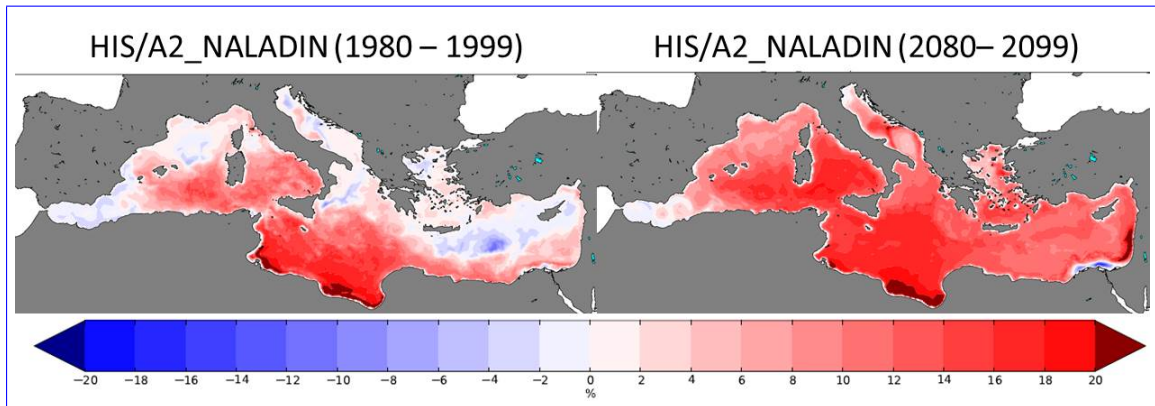

(b) Relative effects of natural dust deposition

**Figure 17.** Present (1980–1999) and future (2080–2099) relative effects of total nitrogen (top) and natural dust (bottom) deposition on surface (0–10 m) total primary production.

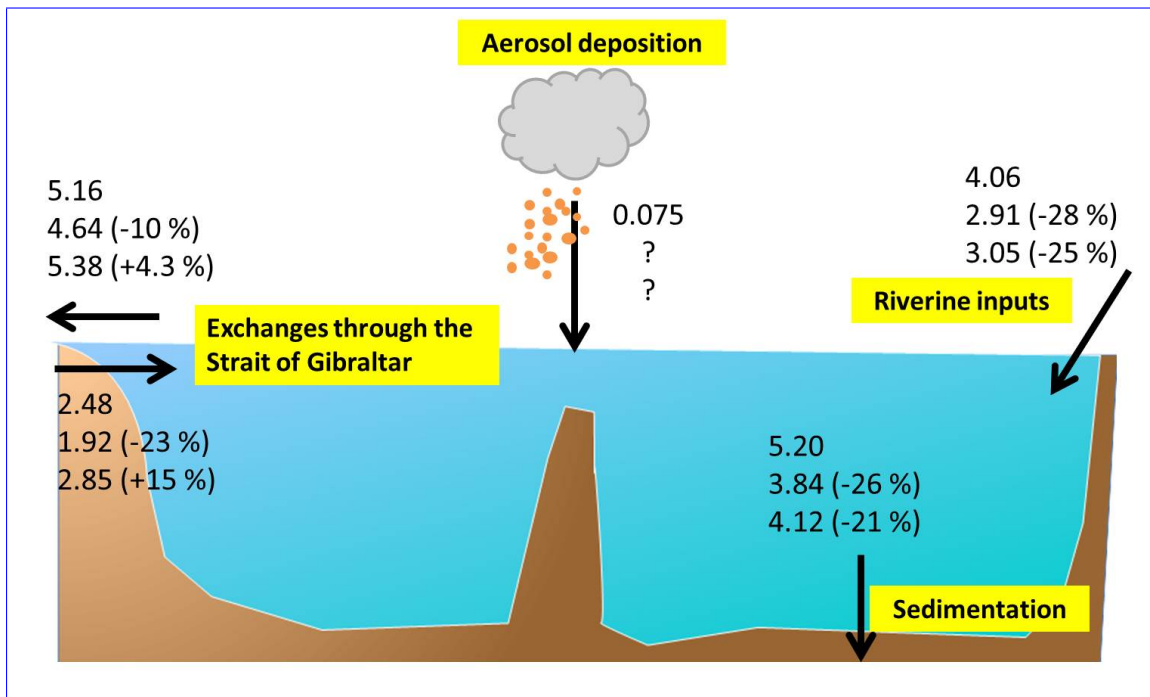

(a) Phosphate fluxes

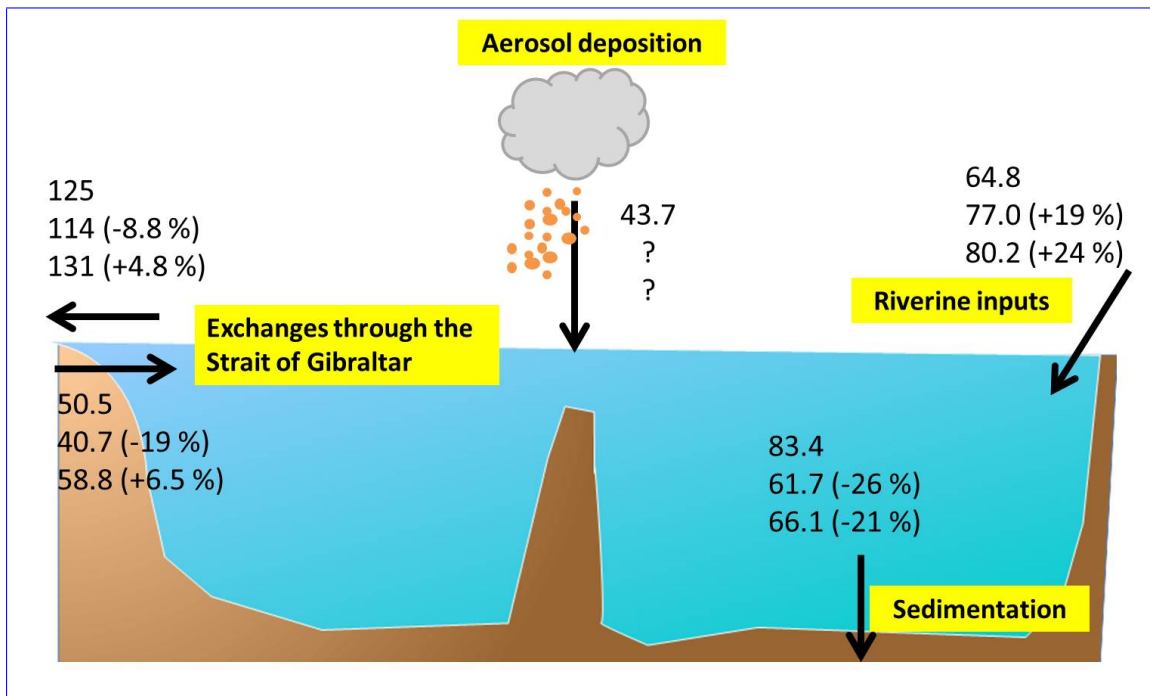

(b) Nitrate fluxes

**Figure 18.** Schematic diagrams illustrating the Mediterranean budgets of phosphate and nitrate. For each component, the 3 lines represent the average fluxes (in Gmol year<sup>-1</sup>) over the periods 1980–1999, 2030–2049 and 2080–2099, numbers in parenthesis indicate the percentage difference from the 1980–1999 values.



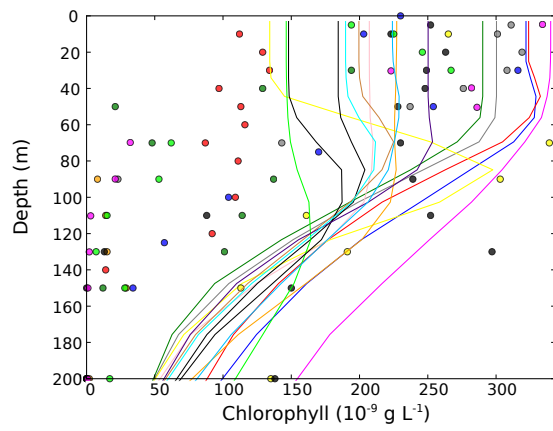

(a) February

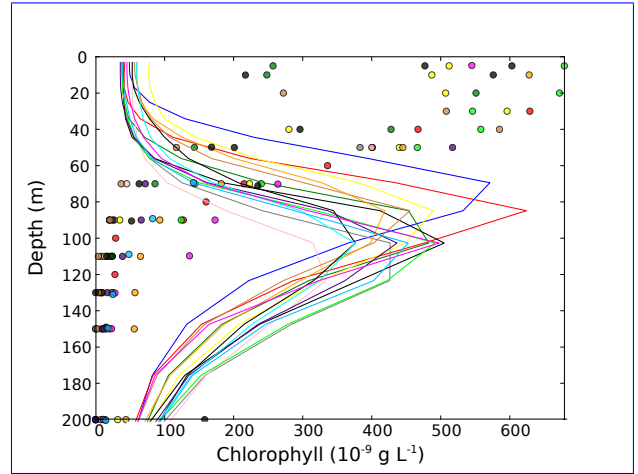

(b) May

**Figure A1.** Average chlorophyll-a profiles in February (left) and ~~June~~ May (right) for the ~~first 20 years of the CTRL simulation~~ 1991 to 2005 at the DYFAMED station in the Ligurian Sea Sea (43.4277°N, 7.2522°E). Dots represent data points (Marty et al., 2002; Faugeras et al., 2003). Lines represent the HIS/A2 simulation. Colors represent individual years.

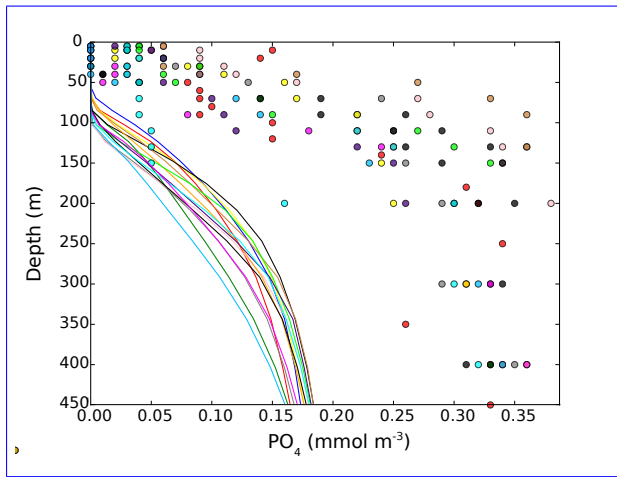

(a) Phosphate

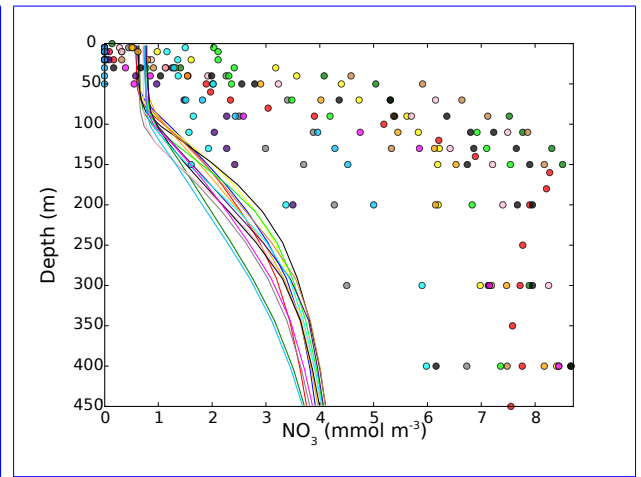

(b) Nitrate

**Figure A2.** Average phosphate (left) and nitrate (right) profiles in May for the years 1991 to 2005 at the DYFAMED station in the Ligurian Sea Sea (43.4277°N, 7.2522°E). Dots represent data points (Marty et al., 2002; Faugeras et al., 2003). Lines represent the HIS/A2 simulation. Colors represent individual years.

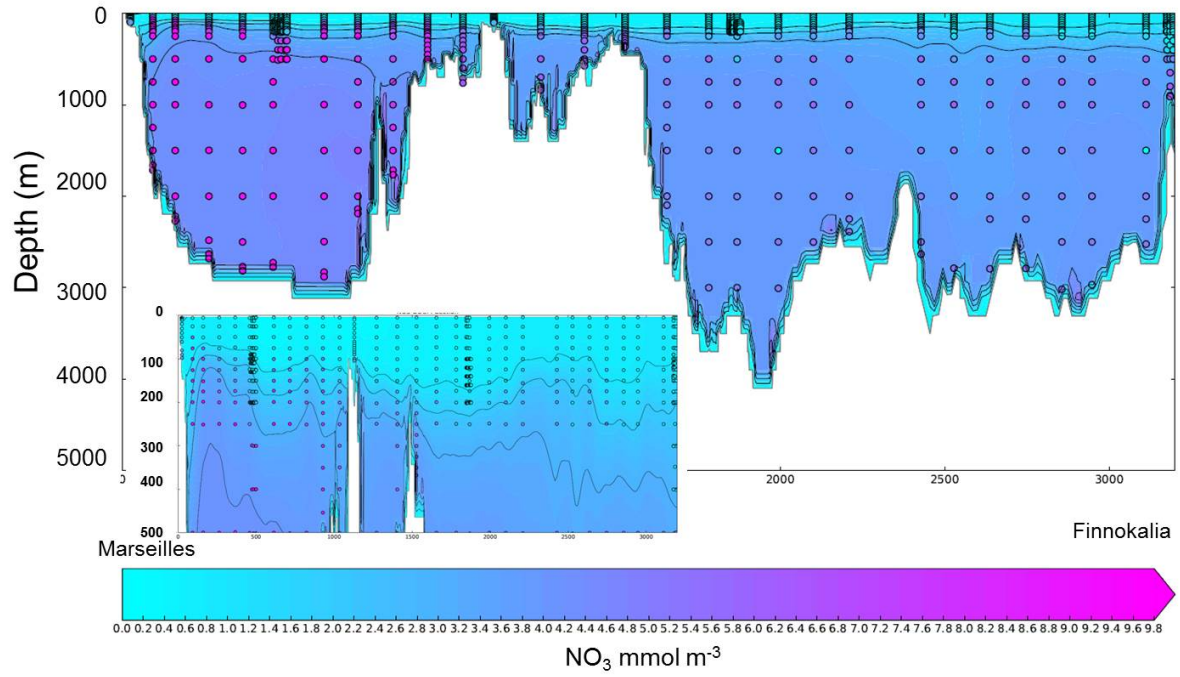

(a) nitrate concentration

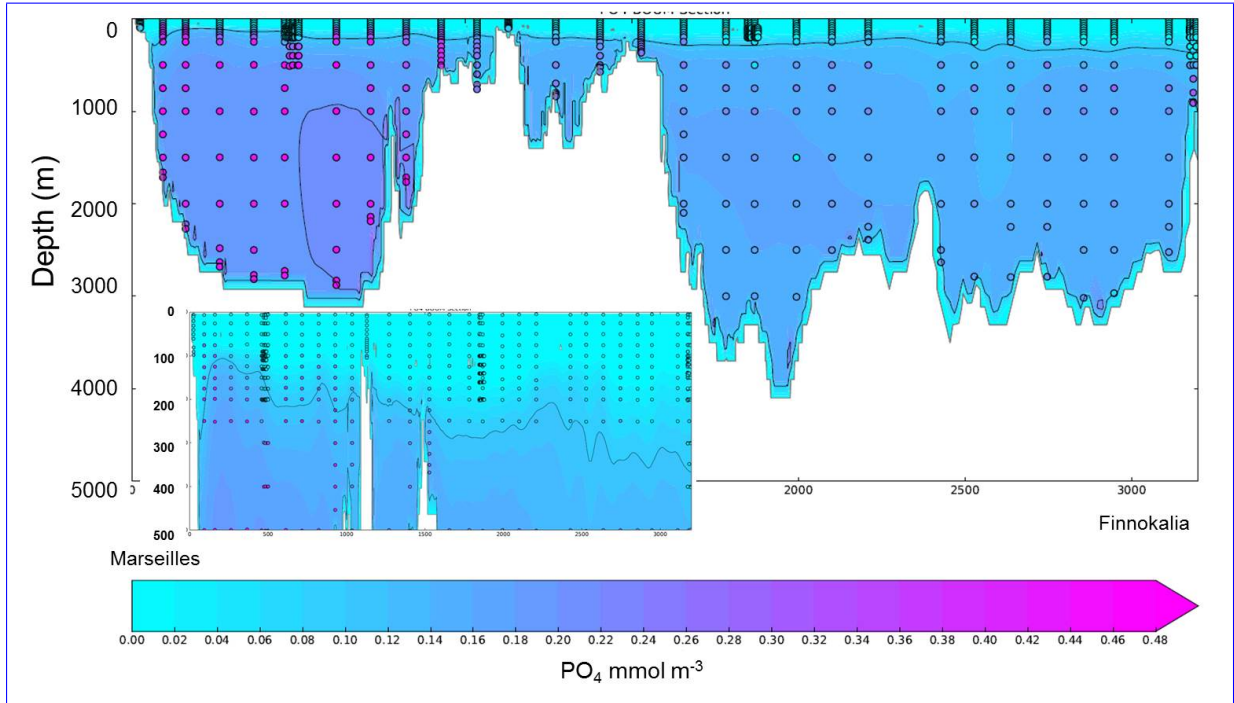

(b)  $\text{PO}_4$  concentration

**Figure A3.** Average concentrations of nitrate (top) and phosphate (bottom) for the 20 first years of the control simulation (CTRL). The dots represent data along a transect from Marseille to Finnokalia from the BOUM campaign (distances in km Moutin et al., 2012). The framed areas represent a vertical zoom of the top 500 m along the whole transect.
