# Supplementary material for: Biogeochemical response of the Mediterranean Sea tothe transient SRES–A2 climate change scenario
Source: Copernicus journal article supplement (doi:10.5194/bg-2018-208), 2018-05-24
Supplement: Supplementary file [file bg-2018-208-AC4-supplement.pdf]

# Biogeochemical response of the Mediterranean Sea to the transient SRES–A2 climate change scenario

Camille Richon<sup>1,\*</sup>, Jean-Claude Dutay<sup>1</sup>, Laurent Bopp<sup>2</sup>, Briac Le Vu<sup>2</sup>, James C. Orr<sup>1</sup>, Samuel Somot<sup>3</sup>, and François Dulac<sup>1</sup>

<sup>1</sup>LSCE/IPSL, Laboratoire des Sciences du Climat et de l'Environnement, CEA-CNRS-UVSQ, Gif-sur-Yvette, France

<sup>2</sup>Laboratoire de Météorologie Dynamique, LMD/IPSL, Ecole Normale Supérieure - PSL Research Univ., CNRS, Sorbonne Université, Ecole Polytechnique, Paris, France

<sup>3</sup>CNRM UMR 3589, Météo-France/CNRS, Toulouse, France

\*Now at: Department of Earth, Ocean and Ecological Sciences, School of Environmental Sciences, University of Liverpool, Liverpool L69 3GP, UK

*Correspondence to:* Camille Richon (crichon@liverpool.ac.uk)

**Abstract.** The Mediterranean region is a climate change hot-spot. Increasing greenhouse gas emissions are projected to lead to a significant warming of Mediterranean Sea waters, as well as major changes in its circulation, but the subsequent effects of such changes on marine biogeochemistry are still poorly understood. Our aim is to investigate the changes in nutrient concentrations and biological productivity in response to climate change in the Mediterranean region. To do so, we perform transient simulations with the coupled high resolution model NEMOMED8/PISCES using the high-emission IPCC SRES-A2 socio-economic scenario and corresponding Atlantic, Black Sea, and riverine nutrient inputs. Our results indicate that nitrate is accumulating in the Mediterranean Sea over the 21st century, whereas no tendency is found for phosphorus. These contrasted variations result from an unbalanced nitrogen-to-phosphorus input from fluxes through the Strait of Gibraltar and riverine discharge and lead an expansion of phosphorus-limited regions across the Mediterranean. In addition, phytoplankton net primary productivity is reduced by 10 % in the 2090s in comparison to the present state, with reductions of up to 50 % in some regions such as the Aegean Sea as a result of nutrient limitation and vertical stratification. We also perform sensitivity tests in order to study separately the effects of climate and biogeochemical input changes on the Mediterranean future state. This article is a first step in the study of transient climate change effects on the Mediterranean biogeochemistry, but calls for coordinated multi-model efforts to explore the various uncertainty sources of such a future projection.

## 1 Introduction

The Mediterranean basin is enclosed by three continents, with mountains, deserts, rivers, and industrialized cities. This area is known as one of the most oligotrophic marine environment in the world (Béthoux

et al., 1998). Because of its high anthropogenic pressure and low biological productivity, this region is predicted to be highly sensitive to future climate change impacts (Giorgi, 2006; Giorgi and Lionello, 2008).

25 Records of the past evolution of the Mediterranean circulation show that the Mediterranean has undergone abrupt changes in its circulation patterns over ancient times. In particular, high stratification events, characterized by the preservation of organic matter in the sediment, known as sapropels, have been recorded several times through geological history. The most recent was recorded 10 000 years ago and lasted about 3 000 years. This accumulation of organic matter in the sediments  
30 is interpreted as the result of a strong stratification of the water column leading to suboxic deep layers (e.g. Rossignol-Strick et al., 1982; Rohling, 1991, 1994; Vadsaria et al., 2017). In more recent times, abnormal winter conditions have led to changes in deep water formation, such as the Eastern Mediterranean Transient (EMT) event that occurred during the early nineties and had chemical impacts such as an increase in the Levantine basin salinity (see Theocharis et al., 1999; Lascaratos et al., 1999; Nittis et al., 2003; Velaoras and Lascaratos, 2010; Roether et al., 2014). Also, changes  
35 in the North Ionian Gyre circulation triggered the so-called Bimodal Oscillating System (BiOS) that influenced phytoplankton bloom in the Ionian Sea through the modification of water transport that led to modified nutrient distribution and altered local productivity (Civitarese et al., 2010). These events show that a semi-enclosed basin with short residence time of water (around 100 years, see  
40 Robinson et al., 2001) such as the Mediterranean is highly sensitive to climate conditions and that perturbations of these conditions can modify the circulation, ultimately leading to changes in the biogeochemistry.

Future climate projections with greenhouse gases high-emission scenarios yield an increase in temperature and a decrease in precipitation over the Mediterranean region (Giorgi, 2006; IPCC, 2012) leading to  
45 warmer and saltier seawater (Somot et al., 2006; Adloff et al., 2015). As a result of these changes, the Mediterranean thermohaline circulation (MTHC) may significantly change with a consistent weakening in the western basin and a less certain response in the eastern basin in climate change scenarios characterized by high greenhouse gases emission (Somot et al., 2006; Adloff et al., 2015). In all A2 runs, Adloff et al. (2015) show an increase in the stratification index at the end of the 21st  
50 century. This will likely weaken the vertical mixing and may reduce nutrient supply in the upper layer of the Mediterranean that is essential for phytoplankton to bloom (d'Ortenzio and Ribera d'Alcalà, 2009; Herrmann et al., 2013; Auger et al., 2014).

Primary productivity in the ocean is influenced by water circulation and vertical mixing that brings available nutrients to phytoplankton (Harley et al., 2006). Changes in oceanic physics such as modification  
55 of vertical mixing can have dramatic effects on plankton community dynamics and ultimately on the productivity of the entire oceanic food web (Klein et al., 2003; Civitarese et al., 2010). Few studies have investigated the sensitivity of the oligotrophic Mediterranean Sea to future climate change (e.g. Herrmann et al., 2014, for the northwestern Mediterranean). Lazzari et al. (2014) investigated

the effects of the A1B SRES (Special Report on Emissions Scenarios) moderate climate change  
60 scenario on the Mediterranean biological productivity and plankton communities. They performed  
short (10–year) non–transient simulations at the beginning and the end of the 21st century and  
found a decreasing trend of phytoplankton biomass in response to this climate change scenario.  
Macias et al. (2015) simulated a "baseline" of expected consequences of climate change alone on  
the Mediterranean primary productivity. They found that according to the RCP 4.5 and RCP 8.5  
65 scenarios, integrated primary productivity over the eastern Mediterranean basin may increase as a  
result of density changes (increased stratification isolating the upper layer from the rest of the water  
column). However, their results are based on non–transient simulations and present–day nutrient  
inputs. The response of the Mediterranean biogeochemistry to transient climate and biogeochemical  
change scenarios has never been evaluated.

70 Being a semi–enclosed oligotrophic basin, the Mediterranean is highly sensitive to external nutrient  
inputs. Their origins are mainly from coastal runoff, river discharge (Ludwig et al., 2009), Atlantic  
inputs through the Strait of Gibraltar (Gómez, 2003; Huertas et al., 2012), and atmospheric deposition  
(see e.g. Dulac et al., 1989; Christodoulaki et al., 2013; Gallisai et al., 2014; Guieu et al., 2014;  
Richon et al., 2017, 2018). Recent studies also showed that direct wastewater discharge (Powley  
75 et al., 2016) and submarine groundwater (Rodellas et al., 2015) may be important sources of nutrient  
for the Mediterranean. However, these sources are to date not well quantified. This study aims at  
understanding the biogeochemical response of the Mediterranean to a "business–as–usual" climate  
change scenario throughout the 21st century. For this purpose, we use the high resolution coupled  
physical–biogeochemical model NEMOMED8/PISCES. We model the evolution of biogeochemical  
80 tracers (nutrients, chlorophyll–a concentration, plankton biomass and primary production) under the  
SRES A2 climate change scenario for the 21st century (IPCC and Working Group III, 2000). The  
choice of the A2 scenario was driven by the availability of daily 3–D forcings for the biogeochemical  
model (physical forcings such as ocean currents, temperature and salinity, see Adloff et al., 2015).  
We are aware that using a single simulation will limit the robustness of our results. However the  
85 computer power required to perform large ensembles with PISCES and the unavailability of 3-D  
daily ocean transient scenario data currently prevent a more extensive assessment.

This article is organized as follows: the coupled model, forcings and the different simulations are first  
described. We briefly evaluate the biogeochemical model in Section 3.1 and present the evolution  
of the physical and biogeochemical forcings in Section 3.2. In section 3.3, we expose the temporal  
90 evolution of the main nutrients, their budgets in present and future conditions and discuss their  
impact on the biogeochemistry of the Mediterranean Sea in section 4.

## 2 Methods

### 2.1 The ocean model

The oceanic general circulation model used in this study is NEMO (Madec, 2008) in its regional  
95 configuration for the Mediterranean Sea (NEMOMED8 Beuvier et al., 2010). The NEMOMED8  
grid has a horizontal resolution of  $1/8^\circ$  stretched in latitude (i.e., with a resolution from 9 km in  
the North to 12 km in the South of the domain). The model has 43 vertical levels with varying  
thicknesses (from 6 m in the surface layer to 200 m in the deepest layer). The Atlantic boundary is  
closed at  $11^\circ\text{W}$  and tracers are introduced in a buffer zone between  $11^\circ\text{W}$  and  $6^\circ\text{W}$ .

100 Air–sea fluxes (momentum, heat, water) and river discharges used to force NEMOMED8 are prescribed  
by the atmospheric Regional Climate Model ARPEGE–Climate (Déqué et al., 1994; Gibelin and  
Déqué, 2003) using a global and stretched grid, which has a 50–km horizontal resolution over the  
area of interest.

### 2.2 The SRES–A2 scenario simulation

105 ARPEGE–Climate is itself driven by greenhouse gases (GHG) and aerosol forcings following the  
observations (up to year 2000) and the SRES–A2 scenario afterwards and by SST (Sea Surface  
Temperature) coming from a previously run CNRM–CM coupled GCM (General Circulation Model)  
simulation (Royer et al., 2002). In addition, the ocean component of CNRM–CM (a low resolution  
NEMO version) provides the near–Atlantic conditions (3–D potential temperature and salinity) for  
110 NEMOMED8. The various forcings and the modeling chain from the GCM to the ocean regional  
model are described in details in Somot et al. (2006) and Adloff et al. (2015).

The NEMOMED8 simulation (ocean physics and forcings) used here corresponds to one of the  
simulations used and studied in Adloff et al. (2015), and more specifically the simulations labeled  
HIS (historical period 1961 to 1999) and A2 (A2 scenario period 2000–2099) in their Table 1.

115 This physical run has already been used to study climate change impacts on Mediterranean marine  
ecosystems (Jordà et al., 2012; Hattab et al., 2014; Albouy et al., 2015; Andrello et al., 2015).

The main changes on the Mediterranean Sea physics (SST, SSS -Sea Surface Salinity-, surface  
circulation, deep convection and thermohaline circulation, vertical stratification, sea level) are detailed  
in Adloff et al. (2015). Briefly, changes in temperature and precipitation in the A2 scenario lead to  
120 increased evaporation in the basin. Freshwater inputs from rivers and the Black Sea decrease along  
with total precipitation. This consequently leads to a significant increase in net transport through the  
Strait of Gibraltar (+0.018 Sv). Temperature and salinity increase strongly, leading to a decrease in  
surface density and an overall increase in vertical stratification. Average sea surface temperature of  
the Mediterranean rises by up to  $3^\circ\text{C}$  by the end of the century. However, the temperature rise is  
125 not homogeneous in the basin, regions such as the Balearic, Aegean, Levantine and North Ionian  
undergo a more intense warming (over  $3.4^\circ\text{C}$ ) probably due to the addition of the atmosphere-

originated quasi-homogeneous warming with the local effect of surface current changes. The salinity increases by 0.5 (practical salinity units) on average across the basin.

In the A2 simulation, the entire Mediterranean basin is projected to become more stratified by 2100  
130 and deep water formation is generally reduced. These variations in hydrological characteristics of the water masses generate important changes in the circulation and in particular in the vertical mixing intensity. The strong reduction in vertical mixing observed in all deep water formation areas of the basin is linked with the changes in salinity and temperature of the water masses.

### 2.3 The biogeochemical model

135 Here, the physical model NEMOMED8 is coupled to the biogeochemical model PISCES (Aumont and Bopp, 2006), already used for investigations in the Mediterranean basin (Richon et al., 2017, 2018). This Monod-type model (Monod, 1958) has 24 biogeochemical compartments including 2 phytoplankton (nanophytoplankton and diatoms) and 2 zooplankton size classes (microzooplankton and mesozooplankton). Phytoplankton growth is limited by the external concentration of five different  
140 nutrients: nitrate, ammonium, phosphate, silicic acid and iron. In this version of PISCES, elemental ratios of C:N:P in the organic matter are fixed to 122:16:1 following Takahashi et al. (1985). There is no explicit bacterial compartment but bacterial biomass is calculated using zooplankton biomass (see Aumont and Bopp, 2006, for details). Organic matter is divided in 2 forms: dissolved organic carbon (DOC) and particulate organic carbon. The biogeochemical model is ran in offline mode  
145 (see e.g. Palmieri et al., 2015): biogeochemical quantities are passive tracers, they are transported following an advection-diffusion equation using dynamical fields (velocities, mixing coefficients...) calculated beforehand in a separate simulation with only the dynamical model NEMOMED8.

### 2.4 Boundary and initial physical and biogeochemical conditions

External nutrient supply for the biogeochemical model include inputs from the Atlantic Ocean and  
150 from Mediterranean rivers. We did not include atmospheric deposition as there is currently no scenario for its future evolution. Similarly, we did not include submarine groundwater discharge and direct wastewater discharge as there is to date no climatology for these sources. Atlantic input is prescribed from water exchange through the Strait of Gibraltar in the NEMO circulation model along with the concentrations of biogeochemical tracers in the buffer zone. Nutrient concentrations  
155 in the buffer zone are prescribed from a global ocean climate projection using the A2 simulation values from IPSL-CM5-LR (Dufresne et al., 2013) performed within the framework of the CMIP5 project (Taylor et al., 2012). Nutrient concentrations in the buffer-zone are relaxed to these values with a time constant of one month.

Nutrients input from rivers are derived from Ludwig et al. (2010) before 2000, Dissolved inorganic carbon (DIC) and Si are derived from Ludwig et al. (2009). For the 21st century, we use the  
160 estimations for nutrient discharge proposed by Ludwig et al. (2010) of the "Order from Strength"

scenario from the Millenium Ecosystem Assessment (MEA) (Cork et al., 2005), which gives nitrate and phosphate discharge per sub-basin in 2030 and 2050. Yearly values are obtained by linear interpolation between 2000 and 2030 and between 2030 and 2050, after which they are held constant until the end of the simulation in 2100. Seasonal variability coming from four of the largest rivers for Mediterranean and Black Sea (Rhône, Po, Ebro and Danube) is also included. According to Ludwig et al. (2010), the future trends in nutrient discharge from the major rivers of the Mediterranean stay within the interannual variability over the past 40 years. This scenario is based on hypotheses of very little efforts made towards mitigation of climate change. Ludwig et al. (2010) point out some substantial changes in the nutrient and water budget in specific regions. However, total riverine nutrient input is not drastically changed at the basin scale. In particular, according to their scenario, the northern part of the Mediterranean has decreasing trends in nitrate discharge whereas it is increasing in the southeastern Levantine. Freshwater discharge from Ludwig et al. (2010) is based on the SESAME model reconstruction and differs from the ARPEGE–Climate model used here. This may lead to incoherences between water and nutrient discharges, but the nutrient discharges from Ludwig et al. (2010) are the only available values, and the SESAME model is not coupled with NEMO/PISCES. Adloff et al. (2015) evaluate the changes in total freshwater runoff in the HIS/A2 simulation. Their Table 2 shows that the total freshwater runoff to the Mediterranean is lower than the Ludwig et al. (2009) estimate (by about 30 %). They found approximately 27 % decrease in total runoff by the end of the 21st century. This trend is consistent with the decreasing trend found by Ludwig et al. (2010). However, the 2050 estimates of freshwater runoff from Ludwig et al. (2010) are only 13 % lower than the 1970 and 2000 estimates. The freshwater runoff decrease in the physical model is more important than in the nutrient runoff model. This may result in higher nutrient concentrations at the river mouth. We are also aware that the future evolution of river discharges into the Mediterranean Sea is highly uncertain and depends at least on the scenario choice and on the model and modelling strategy choice (Sanchez-Gomez et al., 2009; Dubois et al., 2012; Adloff et al., 2015). However, nutrients from river discharge are consumed rapidly at proximity of the river mouth and we believe these potential higher concentrations don't have a large impact of the results. Initial nutrient concentrations in the Mediterranean come from the SeaDataNet database (Schaap and Lowry, 2010) and initial nutrient concentrations in the buffer zone are prescribed from the World Ocean Atlas (WOA) (Locarnini et al., 2006). Salinity and temperature are initialized from the MEDATLAS II climatology of Fichaut et al. (2003).

All simulations begin from a restart of a historical run starting in January 1965 following a spin-up of more than 115 years done with a loop of the period 1966 to 1981 for the physical forcings and the river nutrient discharge.

## 2.5 Simulation set-up

All simulations are performed for 120 years. The control run CTRL is performed with forcing conditions corresponding to the 1966–1981 period looped over the simulation period. This period was chosen in order to avoid including in the CTRL years with too important warming such as the 1980s and 1990s. The scenario simulation is referred to as HIS/A2 as in Adloff et al. (2015). HIS is the name of the historical period (in our case between 1980 and 1999), and A2 is the name of the 2000–2099 scenario simulation.

In order to quantify separately the effects of climate and biogeochemical changes, we performed 2 additional control simulations: CTRL\_R with climatic and Atlantic conditions corresponding to present-day conditions and river nutrient discharge following the scenario evolution, and CTRL\_RG with climatic conditions corresponding to present-day conditions, and river nutrient discharge and Atlantic buffer-zone concentrations following the scenario conditions. Table 1 describes the different simulations. The effects of nutrient inputs from exchanges through the Strait of Gibraltar and riverine discharge independent of climate effect are derived by CTRL\_R minus CTRL and CTRL\_RG minus CTRL\_R. Similarly, to derive the effects of climate change and nutrient input change on nutrient budgets, we use the difference between HIS/A2 and CTRL. To derive the effects of climate change only, we calculate the difference between HIS/A2 and CTRL\_RG.

## 3 Results

### 3.1 Evaluation of the NEMOMED8/PISCES model

NEMOMED8 has already been used in a number of regional Mediterranean Sea modeling studies either in hindcast mode (Beuvier et al., 2010; Herrmann et al., 2010; Sevault et al., 2014; Soto-Navarro et al., 2015; Dunić et al., 2016) or scenario mode (Adloff et al., 2015). It produces the main characteristics of the Mediterranean Sea circulation. Evaluation of the HIS simulation provided in Adloff et al. (2015) shows that the main physical characteristics of the Mediterranean are produced, in spite of a too cold upper layer (1°C colder than observations) and too little stratification in comparison to observations. In particular, the HIS simulation matches closely the observed thermohaline circulation in the Adriatic and Ionian basins (see Adloff et al., 2015).

The regional NEMOMED physical model has already been coupled to the biogeochemical model PISCES on a 1/12° grid horizontal resolution (Palmieri et al., 2015; Richon et al., 2017, 2018), but no future climate simulation has yet been performed. As a first study coupling NEMOMED8 with PISCES, we compared the main biogeochemical features of our simulations with available data. Figure 1 shows the surface average chlorophyll concentrations in the top 10 meters of the CTRL and HIS/A2 simulations, and from satellite estimations from MyOcean Dataset (<http://marine.copernicus.eu>). All chlorophyll values in the article and the data are chlorophyll-a. The model correctly reproduces

230 the main high-chlorophyll regions such as the Gulf of Lions and coastal areas. However, Figure 1 shows an underestimation of about 50 % of the surface chlorophyll concentrations by the model in these productive areas. The west-to-east gradient of productivity is also reproduced by the model with values that agree with satellite estimates. Moreover, this Figure shows that chlorophyll produced by the CTRL is stable over time. The model fails, however, to reproduce the observed chlorophyll-  
235 rich areas in the Gulf of Gabes and at the mouth of the Nile. This discrepancy is probably linked with insufficient simulated nutrient discharge from coastal runoff in these regions. Moreover, several studies (see e.g. Claustre et al., 2002; Morel and Gentili, 2009) show that satellite estimates have a systematic positive bias in the coastal regions because of the high concentrations of colored dissolved organic matter and the presence of dust particles in seawater back scattering light. Figure 2 provides  
240 an evaluation of the average chlorophyll surface concentration evolution over the entire basin for the period 1997–2005. This Figure shows that the normalized chlorophyll surface concentration in the model is close to the estimates provided by the SeaWiFs satellite data (Bosc et al., 2004). Even though the interannual variability of the model is 50 % smaller than in the satellite product, the model captures the increase in chlorophyll concentration between 2002 and 2005 (approximately  
245 15 % of increase in the model and 30 % in the satellite data). The evaluation of the model against 2 independent datasets shows that the model yields satisfying estimates of surface chlorophyll.

The vertical distribution of nitrate and phosphate over a section crossing the Mediterranean from East to West as well as chlorophyll and nutrient concentration profiles at the DYFAMED station are shown in appendix (Figures A1 and A3). These figures show that the model produces some seasonal  
250 and interannual variability of the nutricline depth and intensity. However, the nutricline depth and DCM depth are consistently overestimated by the model in comparison to the data. The nutricline intensities seem to be underestimated by about 50 % and the depth is overestimated. However, nutricline depth deepens from 100–120 m to 180–200 m between the western and the eastern basins (see Figure A3).

255 In spite of some underestimation of nutrient concentrations that are probably linked with the features of the simulated intermediate and deep waters characteristics, the PISCES model reproduces the main characteristics of the Mediterranean biogeochemistry, including a salient west-to-east gradient in nutrient concentrations, low surface nutrient concentrations and a deep chlorophyll maximum (DCM). The average chlorophyll concentration observed at the DYFAMED station in the top 200 m  
260 is  $233 \pm 146 \text{ } 10^{-9} \text{ g L}^{-1}$  (average over the 1991–2005 period), while the model value for the HIS/A2 simulation over the same period is  $159 \pm 87 \text{ } 10^{-9} \text{ g L}^{-1}$ . These performances lend credence to our efforts to investigate the evolution of the Mediterranean biogeochemistry under the A2 climate change scenario with the same modeling platform.



### 3.2 Evolution of temperature and salinity

265 Average surface temperature and salinity (SST and SSS) evolution in the entire basin during the  
CTRL and HIS/A2 simulations are shown in Figure 3, which confirms results from Adloff et al.  
(2015) and shows that the CTRL simulation is stable over time. Beyond this basin-wide average  
variation in SST and SSS, a more detailed analysis reveals much greater variability depending on  
the region (Somot et al., 2006; Adloff et al., 2015). For instance, the Balearic Sea is more sensitive  
270 to warming than the rest of the western basin, and the eastern basin has a more intense warming than  
the western basin (up to 3°C warming in the eastern basin and in the Balearic Sea). Also, the surface  
salinity in the Aegean Sea increases more than the other regions.

### 3.3 Evolution of the nutrient budgets in the Mediterranean Sea

275 The nutrient budgets of the semi-enclosed Mediterranean basin are highly dependent on external  
sources (e.g. Ludwig et al., 2009, 2010; Huertas et al., 2012; Christodoulaki et al., 2013). In order  
to map the effects of climate change on the Mediterranean nutrient balance, we calculated mass  
budgets of inorganic nitrate and phosphate during the simulated period. These budgets take into  
account changes in Atlantic input, river discharge and sedimentation. Nitrate can also accumulate in  
280 the Mediterranean waters through N<sub>2</sub> fixation by cyanobacteria, but this process accounts for less  
than 1 % of the total nitrate budget (Ibello et al., 2010; Bonnet et al., 2011; Yogeve et al., 2011), and  
is neglected here.

In this Section, we refer to the period 1980-1999 as the beginning of the century, to the period 2030-  
2049 as the middle of the century and to the period 2080-2099 as the end of the century. Also,  
285 we derive the effects of river input changes as the difference of nutrient concentrations between  
CTRL\_R and CTRL over these time periods. Similarly, the effects of changes in nutrient fluxes  
through the Strait of Gibraltar are derived by the differences between CTRL\_RG and CTRL\_R, and  
the effects of climate change by the difference between HIS/A2 and CTRL\_RG.

#### 290 3.3.1 Phosphate and nitrate budgets under climate and biogeochemical changes in the Mediterranean

Tables 2 and 3 summarize the average phosphate and nitrate content in all simulations for the 3 time  
periods described earlier.

295 Phosphate content in the entire Mediterranean has increased in our simulation by 6 % over the 21st  
century, as determined by the difference between CTRL and HIS/A2 simulations between 1980-  
1999 and 2080-2099. The increase is more important in the eastern basin than in the western basin.

In particular, we observe an 8 % increase in phosphate content in the Ionian–Levantine sub–basin in 2080–2099 compared to 1980–1999. The effects of phosphate river input changes are substantial  
300 over the first half of the century. We observe 3 % decrease in phosphate content in the entire Mediterranean between 1980–1999 and 2030–2049 due to river input changes (difference between CTRL\_R and CTRL). Changes in phosphate fluxes through the Strait of Gibraltar seem to have limited effect on the global Mediterranean phosphate content. However, climate change effects lead to a global enhancement of 10 % in phosphate content in 2080–2099 in comparison to 1980–1999.  
305 This result shows contrasted effects of physical and biogeochemical conditions on the evolution of nutrient concentrations.

Table 3 shows that in the model, the combined effects of climate, riverine and Atlantic nutrients input changes over the 21st century lead to a 17 % increase in nitrate content over the Mediterranean  
310 in the 2080–2099 period compared to 1980–1999 (derived from the calculation of HIS/A2–CTRL). Changes in river discharge in the Mediterranean over the century lead to 9 % enhancement of nitrate content by the end of the century (2080–2099) compared to the beginning of the simulation period (1980–1999). The most important effects of river input changes are observed in the Adriatic basin (over 50 % nitrate accumulation by the end of the century). Over the entire Mediterranean, the  
315 effects of changes in the fluxes through the Strait of Gibraltar on nitrate content are weak ( $< 1$  %). However, the comparison of nitrate content in CTRL\_R and CTRL\_RG in the western basin shows a 3 % decrease in nitrate content in the western basin during the 2030–2049 period followed by an increase resulting in +1 % nitrate by 2080–2099 compared to the 1980–1999 period. Finally, climate change effects lead to 7 % increase in nitrate content over the Mediterranean basin in the 2080–2099  
320 period compared to 1980–1999 (computed by HIS/A2–CTRL\_RG). These results indicate that river inputs and climate change are the main drivers of nitrate content changes in the Mediterranean basin over the 21st century.

### 3.3.2 Fluxes of nutrients through the Strait of Gibraltar

The Mediterranean is connected to the global ocean by the narrow Strait of Gibraltar. Water masses  
325 transport through this strait contributes substantially to its water and nutrient budgets (e.g. Gómez, 2003; Huertas et al., 2012). The Mediterranean is a remineralization basin that has net negative fluxes of inorganic nutrients (i.e. organic nutrients enter the basin through the Gibraltar Strait surface waters and inorganic nutrient leave the Mediterranean through the deep waters of the Gibraltar Strait Huertas et al., 2012). Figure 4 shows the evolution of incoming and outgoing nitrate and phosphate  
330 fluxes through the Strait of Gibraltar in the HIS/A2 and in the CTRL simulations. We observe similar trends in phosphate and nitrate fluxes in the model. This is linked to the Redfieldian behavior of the primary production in PISCES. According to the HIS/A2 simulation, the incoming fluxes of nitrate and phosphate decrease slightly (from 50 to 35 Gmol month<sup>-1</sup> for nitrate and from 2.5 to 1.55

Gmol month<sup>-1</sup> for phosphate) until the middle of the century (with a period of increased incoming  
335 fluxes of both phosphate and nitrate in the 1990s) and then increase to reach values higher than  
the control in the last 25 years of simulations (Figure 4). Outgoing fluxes follow the same trends  
as incoming fluxes: total outgoing nitrate and phosphate fluxes decrease from 1980 to 2040 (flux  
values getting closer to zero) and then increase until the end of the century. We observe a decreasing  
trend in the nitrate outgoing flux in the control (from -129 to -110 Gmol month<sup>-1</sup> representing about  
340 18 %). At the end of the 21st century, incoming fluxes of nutrients have increased in the scenario  
simulation by about 13 % (difference between the 2080–2099 and 1980–1999 periods). But this  
significant increase (linear regression reveals a positive slope with correlation coefficient greater  
than 0.75 and p-value < 0.001 for the second half of the simulation period for both nitrate and  
phosphate) follows a decrease of over 20 % in incoming nutrient fluxes between the 1980–1999  
345 and the 2030–2049 periods. Most of the decrease is observed between 2030 and 2040 (decrease  
of 15 and 1 Gmol month<sup>-1</sup> for nitrate and phosphate respectively during this decade). Outgoing  
fluxes increase less between the beginning and the end of the century (3.5 and 3.9 % for phosphate  
and nitrate respectively, Figure 4). If the relative changes in incoming and outgoing fluxes seem  
to indicate an increase in the net incoming flux, the absolute values seem to show a rather steady  
350 net flux between the beginning and the end of the century. Net flux at the beginning of the century  
is around -83 Gmol month<sup>-1</sup> for nitrate and -3 Gmol month<sup>-1</sup> for phosphate. At the end of the  
century, the fluxes are about -80 Gmol month<sup>-1</sup> and -2.5 Gmol month<sup>-1</sup> for nitrate and phosphate  
respectively. Also, these net fluxes are close to the CTRL net fluxes. These trends result from the  
evolution of water fluxes through the Strait of Gibraltar computed by NEMOMED8 and the A2  
355 scenario of nutrient concentrations in the buffer zone taken from Dufresne et al. (2013).

The imbalance between incoming and outgoing nutrient flux anomalies may be a cause for the  
observed accumulation of inorganic nutrients (in particular of nitrate) in the basin.

### 3.3.3 River fluxes of nutrients

River discharge is the main external source of phosphate for the eastern part of the basin (Krom  
360 et al., 2004; Christodoulaki et al., 2013). Figure 5 shows the total discharge of phosphate and nitrate  
from rivers to the Mediterranean Sea.

Phosphate discharge decreases by 25 % between the beginning and the end of the simulation period.  
As suggested by Ludwig et al. (2010), phosphate discharge in the A2 period stays lower than in the  
365 HIS period, in spite of a small discharge enhancement between 2030 and 2049.

Nitrate discharge in the HIS/A2 simulation is significantly higher than in CTRL (between 30 and 60  
Gmol month<sup>-1</sup> difference). Nitrate total discharge in the Mediterranean has continuously increased  
from the 1960s (see the CTRL values for the years 1966–1981). According to the HIS/A2 simulation,  
total river nitrate discharge is 24 % larger during 2080-2099 than during 1980-1999.

### 370 3.3.4 Sedimentation

Sedimentation removes nutrients from the Mediterranean Sea. In this version of PISCES, the loss of nitrogen and phosphorus to the sediment is calculated from the sinking of organic carbon particles to the sediment (linked through the Redfield ratio). Sediment fluxes of phosphorus and nitrogen during the simulations are shown in Figure 6.

375

The loss to the sediment decreases rapidly during the HIS simulation (1980–1999). By the end of the 21st century, sedimentation of P and N are almost 50 % lower relative to the 1980 fluxes.

### 3.3.5 Evolution of phosphate and nitrate concentrations

380 In order to observe the general evolution of nutrient concentrations over the 21st century, we plotted the evolution of phosphate and nitrate concentrations for the entire simulation period in the western and eastern basins. The separation between western and eastern basin is the Sicily Strait. Therefore, the eastern basin includes the Ionian, Levantine, Adriatic and Aegean basins. Figure 7 shows the evolution of average phosphate concentrations in the western and eastern basin, respectively, for the  
385 surface (0–200 m), intermediate (200–600 m) and bottom (> 600 m) layers of the water column.

Figures 7a and 4b show that the evolution of surface phosphate concentration in the western basin is linked with phosphate inputs through the Strait of Gibraltar (Pearson's correlation coefficient is 0.85,  $p$ -value < 1 %). We observe that phosphate concentration in HIS/A2 decreases in the  
390 surface and intermediate layers of the western basin until the middle of the century (concentration decreases by about  $0.015 \text{ mmol m}^{-3}$  in the surface layer and by  $0.017 \text{ mmol m}^{-3}$  in the intermediate layer) and then increases again until the end of the century to reach similar concentration than in 1980 in the surface layer and higher concentrations than in 1980 in the intermediate layer (about  $0.01 \text{ mmol m}^{-3}$  higher). This evolution is different than the controls. Figure 7a shows that the  
395 difference in phosphate concentrations in the surface layer of the western Mediterranean in the CTRL\_RG and CTRL\_R simulations is important only at the end of the 21st century (approximately from 2070). Therefore, we hypothesize that the similar evolutions of phosphate concentration in HIS/A2 and of incoming fluxes of phosphate through the Strait of Gibraltar throughout the simulation period are linked with changes in physical conditions. In this very dynamic part of the Mediterranean,  
400 changes in physical conditions linked with climate change are preconditioning the western basin to become more sensitive to nutrient fluxes through the Strait of Gibraltar. A slight accumulation of about  $0.015 \text{ mmol m}^{-3}$  of phosphate is observed in the HIS/A2 simulation in the deep western basin. The significant difference between the HIS/A2 simulation and the control runs shows that the evolution of the Mediterranean physics linked with climate change is primarily responsible for

405 the changes in phosphate concentration in the intermediate and deep western basin. Climate change effects lead to an accumulation of phosphate in the intermediate and deep layer that is probably linked to a decrease in surface primary productivity (hence, in nutrient consumption and export), decreased sediment fluxes (see Figure 6), and increased stratification, thus isolating most of the phosphate pool from the surface.

410 Nutrient concentrations in the eastern part of the basin are lower than in the western part (50 % lower phosphate concentration in the surface layer, about 30 % lower concentration in the intermediate layer and about 15 to 20 % lower concentration in the deep layer). In the surface layer, phosphate concentration decreases in the beginning of the simulation and remains low during the 21st century (from 0.022 mmol m<sup>-3</sup> in 1980 to less than 0.015 mmol m<sup>-3</sup> in 2000, Figure 7d). There is, however, 415 a large annual variability in surface phosphate concentration with peaks up to 0.025 mmol m<sup>-3</sup> in 2060. But the HIS/A2 simulation values are consistently below the CTRL concentrations showing an important effect of climate change on surface phosphate reduction. We observe in Figures 7e and 7f an accumulation of phosphate in the intermediate and deep layers (17 and 13 % respectively), with large decennial variability of phosphate concentration in the deep eastern basin. In both of these 420 layers, HIS/A2 concentrations are higher than the CTRL concentrations.

The evolution of nitrate concentration shows an accumulation over the century in all regions of the intermediate and deep Mediterranean waters (between 9 and 20 %) in the HIS/A2 simulation (Figures 8b, 8c, 8e and 8f). In the surface western basin, the evolutions of the HIS/A2 and CTRL\_RG simulations are similar, showing the regulating effects of fluxes through the Strait of Gibraltar 425 (Figure 8d). In the intermediate layer, nitrate concentration in the HIS/A2 simulation is decreasing from 4.05 to 3.6 mmol m<sup>-3</sup> between 1980 and 2030. After 2030, the concentration increases again up to 4.3 mmol m<sup>-3</sup>. In the deep western basin, we observe a slight decrease in nitrate concentration in the controls from 4.4 to about 4.15 mmol m<sup>-3</sup> whereas there is a slight accumulation from 4.5 to 4.75 mmol m<sup>-3</sup> in the HIS/A2 over the simulation period.

430 In the eastern basin, the impacts of river discharges of nitrate seem to have large influence on the nitrate accumulation as shown by the similar evolution of HIS/A2 and CTRL\_R simulations (Figures 8e and 8f). However, the evolution of physical conditions seems to have similarly large impacts on the nitrate concentrations in the eastern basin as shown by the difference between CTRL\_R and HIS/A2 (see also Table 3). In particular, nitrate concentrations increase by about 0.5 mmol m<sup>-3</sup> 435 between 1980 and 2099 in the deep eastern basin. Approximately 50 % of this accumulation is due to river discharge. The large differences between the CTRL simulations and the HIS/A2 show that modification of circulation resulting from climate change have substantial impacts on the deep and intermediate nutrient concentrations. Figure 8d shows the contrasted effects of climate and biogeochemical changes. The strong difference between CTRL\_R and CTRL concentrations at 440 the beginning of the simulation (almost 0.4 mmol m<sup>-3</sup>) indicates that riverine nutrient discharge has a strong influence on surface nitrate concentrations in the eastern basin and is responsible for

an important part of the eastern Mediterranean nitrate budget (see also Table 3). But the strong difference between CTRL\_R and HIS/A2 at the end of the century indicates that vertical stratification leads to a decrease in surface layer nitrate concentrations, probably linked both with lower winter  
445 mixing and nutrient consumption by phytoplankton.

### 3.4 Present and future surface nutrient concentrations, primary productivity and nutrient limitations in the surface Mediterranean

450 Figures 9 and 10 show the average surface concentrations of nitrate and phosphate in the beginning of the century (1980–1999) and the relative concentration differences with the end of the century in the HIS/A2 and CTRL simulations. In the Mediterranean Sea, primary productivity is mainly limited by these 2 nutrients and their evolution in the future may impact the productivity of the basin. Figure 9 confirms the previous results showing an accumulation of nitrate in large zones of  
455 the basin, except for the southwestern part of the western basin (Alboran Sea) and a small area in the southeastern Levantine.

On the contrary, Figure 10 shows that phosphate surface concentration is decreasing everywhere in the basin except near the mouth of the Nile and in the Alboran Sea. The specific concentrations observed next to the Nile mouth are linked with an inversion of the N:P ratio (i.e. increase in P  
460 discharge and decrease in N discharge) in this river in our scenario. The distribution of surface phosphate concentration at the end of the century (2080–2099) shows that all P-rich areas of the eastern basin at the beginning of our simulations are depleted by the end of the simulation. For instance, the P rich areas around Crete and Cyprus are no longer observed in the 2080–2099 period (Figure 10). Moreover, Figure 11 shows that these areas match productive zones. All the most  
465 productive zones of the beginning of the century are reduced in size and intensity by the end of the century. The primary production integrated over the euphotic layer (0–200 m) is reduced in our simulation by 10 % on average between 1980–1999 and 2080–2099. However, Figure 11 shows a productivity decrease of more than 50 % in areas such as the Aegean Sea and the Levantine Sea. In general, the differences in surface biogeochemistry between the 1980–1999 and 2080–2099 periods  
470 are weaker in the western basin because of the strong regulating impact of nutrient exchange through the Strait of Gibraltar. The large scale reduction of surface primary productivity may be a cause for the observed reduction in sedimentation (see Figure 6).

We also observe local changes in nutrient concentrations and primary production. For instance,  
475 around Cyprus, changes in local concentrations of nutrients (decrease of about 50 % in phosphate concentration) have substantial effects on primary productivity (decrease from 40-50 gC m<sup>-2</sup> year<sup>-1</sup> to 20-30 gC m<sup>-2</sup> year<sup>-1</sup>). These mesoscale changes may be linked with local circulation changes

(such as mesoscale eddies). These observations show that the evolution of the Mediterranean biogeochemistry is influenced by both meso and large scale circulations patterns.

480

Figure 12 presents the limiting nutrient calculated using PISCES half-saturation coefficients (see Aumont and Bopp, 2006). The limiting nutrient is derived from the minimal value of limitation factors. In the Monod-type model PISCES, nutrient-based growth rates follow a Michaëlis-Menten evolution with nutrient concentrations. In the present period, most of the productive areas are N and P colimited in the simulation (Figure 12). This includes regions such as the Gulf of Lions, the South Adriatic, the Aegean Sea and the northern Levantine. Future accumulation of nitrogen in the basin modifies the nutrient balance causing most eastern Mediterranean surface waters to become P-limited. The total balance of phosphate is more negative in the future than in the present period whereas we observe an inverse situation for nitrate. Therefore, phosphate would become the major limiting nutrient in most of the regions where productivity is reduced such as the Aegean Sea, the northern Levantine basin and the South Adriatic.

485  
490

### 3.5 Modifications of the Mediterranean deep chlorophyll maximum

One specificity of Mediterranean biology is that most planktonic productivity occurs below the surface at a depth called the deep chlorophyll maximum (DCM). Hence, most of the chlorophyll concentration is not visible by satellites (Moutin et al., 2012). Figure 13 shows the average depth of the simulated DCM for the period 1980–1999 and for the period 2080–2099.

495

We observe that the DCM depth changes little during the simulation, even though the physical characteristics of the water masses do change (salinity and temperature). The DCM tends to deepen slightly in some regions such as the South Ionian and the Tyrrhenian basin. These results suggest that the DCM depth is not significantly altered in the future but the intensity of subsurface productivity seems reduced (see Figure 11).

500

Figure 14 shows the average vertical profiles of chlorophyll at the DYFAMED station (43.25° N, 7.52° E) and the average profiles for the western and eastern basins for the 1980–1999 and 2080–2099 periods. The results show that the subsurface chlorophyll maximum is still modeled at the end of the century. At the DYFAMED station, the average DCM depth is unchanged but surface concentration is enhanced by about  $25 \cdot 10^{-9} \text{ g L}^{-1}$ . This shows that local variability in the Mediterranean circulation and biogeochemistry is important. However, we simulated seasonal variability in the chlorophyll concentration profiles at the station with intensity and depth of DCM reduced by about 40 % for some month (not shown). In the western basin, the subsurface maximum in the present and future periods is located at the same depth (100–120 m), but the average chlorophyll concentration is

505

510

reduced by almost 50 %, which confirms the results from Figure 13. In the eastern basin, subsurface  
515 chlorophyll concentration is reduced and the subsurface chlorophyll maximum deepens from 100–  
120 m to below 150 m.

In the oligotrophic Mediterranean, the majority of the chlorophyll is produced within the DCM.  
The changes circulation combined with changes in fluxes through the Strait of Gibraltar and riverine  
520 inputs result in 17 % reduction in integrated chlorophyll production between the 1980–1999 and  
2080–2099 periods. Table 4 reports total chlorophyll production in the 1980–1999, 2030–2049 and  
2080–2099 periods of all the simulations in all Mediterranean subbasins (Figure 2 from Adloff et al.,  
2015). Table 4 shows that chlorophyll production is stable over the CTRL simulation but decreases  
525 in all Mediterranean subbasins over the HIS/A2 simulation. The decrease in chlorophyll production  
is more important in the eastern regions, in particular in the Adriatic and Aegean Seas (-29 and -  
15 % respectively). In the western basin, the loss of chlorophyll is smaller (-13 %). The chlorophyll  
production is probably maintained by the enhancement of nutrient fluxes through the Strait of  
Gibraltar (chlorophyll production in CTRL\_RG does not significantly decrease in the western basin).

530 The results indicate that 85 % of the reduction in chlorophyll production in the future period modeled  
in the HIS/A2 simulation is explained by climate effects (difference between HIS/A2 and CTRL\_RG).  
However, the effects of increased nutrient inputs through the Strait of Gibraltar, decreased riverine  
phosphate inputs and increased riverine inputs of nitrate seem to have opposing effects to climate and  
circulation changes on chlorophyll production. In particular, in the western basin, changes in riverine  
535 discharge of nutrients seem to reduce chlorophyll production (see CTRL\_R values), whereas changes  
in fluxes through the Strait of Gibraltar seem to enhance chlorophyll production (see CTRL\_RG).

### 3.6 Plankton biomass evolution

Most of the biological activity in the marine environment is confined to the euphotic layer which  
is confined to the upper 200 m. Figure 15 shows the evolution of nanophytoplankton and diatom  
540 concentrations in the top 200 m for the entire simulation period in all simulations in the western  
and eastern basins. In HIS/A2, we observe lower biomass for both phytoplankton classes across  
the Mediterranean Sea at the end of the century than at the beginning. In general, diatoms seem  
more sensitive to climate change and their biomass decreases more sharply than nanophytoplankton.  
Moreover, Figure 15c shows that diatom concentrations in the western basin seem to be sensitive to  
545 changes in nutrient input across the Strait of Gibraltar as indicated by the large difference between  
CTRL\_RG and CTRL\_R. However, the low diatom concentration observed in HIS/A2 indicates that  
the evolution of the diatom concentration over the 21st century is primarily influenced by climatic  
drivers.



550 Figure 16 shows the evolution of zooplankton biomass in the top 200 m during the simulation. The same general evolution is found than for the simulated phytoplankton: a decrease in microzooplankton during 1980–2000 (from 0.165 to approximately 0.114 mmol m<sup>-3</sup>), after which it remains stable and consistently below the CTRL values until the end of the simulation in 2100 in all basins. A large drawdown in mesozooplankton levels is simulated in the eastern basin. The average mesozooplankton concentration in the eastern part of the Mediterranean declines by almost 60 % in 2099 in comparison to 1980. However, the average mesozooplankton concentration over the 2080–2099 period is only slightly lower than the average concentration over the 1980–1999 period (0.10 and 0.11 mmol m<sup>-3</sup> respectively) because the decline in concentration occurs within the first years of the HIS/A2 simulation. In the western basin, we observe a marked decrease of mesozooplankton concentrations between 560 1980 and 2040 (a decrease of 0.05 mmol m<sup>-3</sup> is observed between these 2 periods). After 2040, mesozooplankton surface concentration increases regularly to similar values than at the beginning of the simulation. This evolution is similar to those of nutrient concentrations in surface waters of the western basin (Figure 7). In the PISCES model, zooplankton, and in particular mesozooplankton is highly sensitive to the variations of external climatic and biogeochemical conditions because that 565 is the highest trophic level represented. Owing to their bottom–up control, zooplankton canalize all changes at the basin scale and ultimately displays the largest response. This behavior is similar to the trophic amplification observed by Chust et al. (2014) and Lefort et al. (2015).

Altogether, the analysis of plankton biomass evolution during the simulation period suggests that 570 primary and secondary production in the eastern basin are more sensitive to climate change than the western basin in this simulation. The eastern part of the basin is more isolated from the open Atlantic Ocean than is the western part and it receives less nutrients from the Atlantic and from coastal inputs. The eastern basin is also deeper and less productive than the western basin (Crispi et al., 2001). The eastern basin exhibits a decline in the phytoplankton biomass that is similar to the 575 decline in the phosphate concentration. Biological production is mainly P–limited in this basin (see also Figure 12). Therefore, the constant low concentrations of phosphate observed throughout this century limit biological production and keep plankton biomass at low levels.

## 4 Discussion

### 4.1 Biogeochemical forcings

580 Climate change may impact all drivers of biogeochemical cycles in the ocean. In the case of semi–enclosed seas like the Mediterranean, the biogeochemistry is primarily influenced by external sources of nutrients (namely rivers, Atlantic and atmospheric inputs, see Ludwig et al., 2009; Krom et al., 2010) and modification of the physical ocean (vertical mixing, horizontal advection, ..., see Santinelli et al., 2012). Nutrient fluxes from external sources (rivers, aerosols and fluxes through the Strait of

585 Gibraltar) may evolve separately and differently depending on socio-economic decisions and climate  
feedbacks. In this study, different scenarios were used for river inputs ("Order from Strength" from  
Ludwig et al., 2010, based on the Millenium Ecosystem Assessment report) and for Atlantic nutrient  
concentrations (SRES/A2 from Dufresne et al., 2013). Scenarios from the MEA report are based  
on different assumptions from the IPCC SRES scenarios used to compute freshwater runoff in the  
590 HIS/A2 simulation. Moreover, the Ludwig et al. (2010) nutrient discharge transient scenario does  
not represent the interannual variability of nutrient runoff from rivers. Other studies by Herrmann  
et al. (2014) and Macias et al. (2015) used continued present-day discharge of nutrients. As there is  
no consensus nor validated scenario for nutrient fluxes from riverine runoff in the Mediterranean, we  
chose to use one scenario from Ludwig et al. (2010). This scenario has the advantage of being  
595 derived from a coherent modeling framework. However, according to these authors, the socio-  
economic decisions made in the 21st century will influence nitrate and phosphate discharge over the  
Mediterranean. It is difficult to forecast these decisions and the resulting changes in nutrient fluxes  
are uncertain. Moreover, our results emphasize that the biogeochemistry in many coastal regions of  
the Mediterranean Sea such as the Adriatic Sea are highly influenced by riverine nutrient inputs,  
600 which is in accordance with previous work (e.g. Spillman et al., 2007, and references therein). In  
these regions, the effects of nutrient runoff from rivers seem more important than climate change  
effects (see Table 4). In the Adriatic basin, table 3 shows that riverine nitrate discharge is responsible  
for 41 % increase in nitrate concentration over the simulation period (difference between the 1980-  
1999 and the 2080-2099 periods). In the CTRL\_RG simulation, nitrate concentrations are similar to  
605 the CTRL\_R simulation showing no influence of fluxes through the Strait of Gibraltar in this region.  
Finally, nitrate concentrations in the HIS/A2 simulation are close to the CTRL\_R values showing that  
most of the nitrate evolution in this region is linked with riverine discharge. Therefore, the choice of  
river runoff scenario will greatly influence the results in these regions. Associated discrepancies and  
the uncertainties linked with the use of inconsistent scenarios in our simulation should be addressed  
610 by developing a more integrated modelling framework to study the impacts of climate change on the  
Mediterranean Sea biogeochemistry.

No transient atmospheric deposition was considered in this study because there is, to our knowledge,  
no transient scenario for atmospheric deposition evolution over the Mediterranean Sea. However,  
in order to evaluate the potential effects of aerosol deposition on the future Mediterranean Sea, we  
615 performed 2 simulations with respectively total nitrogen ( $\text{NH}_4 + \text{NO}_3$ ) deposition (labeled HIS/A2\_N)  
and total nitrogen and natural dust deposition (labeled HIS/A2\_NALADIN). The deposition fields  
are derived from the global model LMDz-INCA and the regional model ALADIN-Climat respectively  
(see Richon et al., 2017, and references therein for description and evaluation of the atmospheric  
models). The atmospheric deposition fields represent present-day aerosol deposition fluxes that are  
620 repeated over the 1980-2099 simulation period. The following figure (Figure 17) shows the relative  
effects of total nitrogen and natural dust deposition on surface primary production in the 1980-

1999 and 2080–2099 periods. As shown in Richon et al. (2017), dust deposition is a source of phosphate for the surface Mediterranean. As our HIS/A2 simulation shows a decrease in surface  $\text{PO}_4$  concentrations, thus accentuating phosphate limitation over the Mediterranean basin by the end  
625 of the 21st century, the relative effects of phosphate deposition from dust are increased in the 2080–2099 period in comparison to the 1980–1999 period. Conversely, nitrogen atmospheric deposition has very little effect on Mediterranean primary production at the end of the simulation period because most of the basin is not N-limited.

## 630 **4.2 Climate change scenario**

Although the physical model adequately represents the MHTC (Adloff et al., 2015), there are many uncertainties linked with climate change projections. Some are discussed in Somot et al. (2006), in particular, the need to using different IPCC scenarios for climate change projections and MTHC changes. Adloff et al. (2015) apply an ensemble of SRES scenarios and boundary conditions to  
635 the Mediterranean Sea and discuss their effects on MTHC. In particular, their results suggests that the choice of atmospheric and Atlantic conditions has a strong influence on the MTHC. The A2 scenario that we used was the only available with 3-D daily forcings for coupling with the PISCES biogeochemical model. However, Adloff et al. (2015) showed that other SRES scenarios such as the A1B or B1 may lead to a future decrease in the vertical stratification with probably different  
640 consequences on the Mediterranean Sea biogeochemistry. Our study should be considered as a first step for transient modeling of the Mediterranean Sea biogeochemistry but should be complemented by new simulations that explore the various sources of uncertainty (model choice, internal variability, scenario choice) once appropriate forcings become available for multiple models as expected from the Med-CORDEX initiative (Ruti et al., 2015).

## 645 **4.3 Uncertainties from the PISCES model**

The evaluation of the CTRL simulation showed that NEMOMED8/PISCES is stable over time in spite of a slight drift in nitrate concentrations (see Figure 8). Nutrient concentrations in the intermediate and deep layers were shown to be underestimated in comparison to measurements (see appendix). Nutrient concentrations can be underestimated by up to 50 %, in particular in the  
650 deep eastern basin. Moreover, nitrate fluxes from coastal discharge in CTRL are lower than in HIS/A2. The low riverine discharge and the imbalance in sources and sinks explains the loss of nitrate in the CTRL (see Figures 8 and 9). Organic forms of nutrients are not directly available to phytoplankton in this version of PISCES, and are not included in our nutrient budgets. Powley et al. (2017) show that organic forms of nutrient are an important part of the Mediterranean elemental  
655 budgets. Therefore, we may be missing a part of the N and P budgets in our calculations. The simulated chlorophyll-a vertical profiles at the DYFAMED station show a correct representation of

the subsurface productivity maximum of the Mediterranean in spite of a mismatch in the subsurface chlorophyll maximum depth between model and measurements. Model values were not corrected to match data, and we are therefore conscious that the uncertainties in the representation of present-day biogeochemistry by the PISCES model may be propagated in the future.

In the PISCES version used in this study, nitrate and phosphate concentration variations are linked by the Redfield ratio (Redfield et al., 1963). The Redfield hypothesis of a fixed nutrient ratio used for plankton growth and excretion holds true for most parts of the global ocean, but may not be true for oligotrophic regions such as the Mediterranean Sea (e.g. Béthoux and Copin-Montégut, 1986). Moreover, changes in nutrient balance influence the nutrient limitations as shown by Figure 12. The results simulated with the Redfieldian hypothesis are coherent with the observed variations of nutrient supply to the Mediterranean Sea and yield realistic biological productivity. But results concerning nutrient limitations might change in a non Redfieldian biogeochemistry model.

#### 4.4 Climate versus biogeochemical changes effects

Figure 18 summarizes the fluxes of phosphate and nitrate in and out of the Mediterranean considered in this study.

In general, the sum of nitrogen net fluxes into the Mediterranean basin (Riverine, Gibraltar Strait and sedimentary sources and sinks) increases by 39 % at the end of the century in the scenario (HIS/A2) whereas it is increased by 23 % in the control (CTRL) in comparison to the beginning of the simulation (1980). The balance between inputs and outputs of phosphorus increases by 9 % in the scenario and by 11 % in the control (net gain of phosphorus in the basin). These results suggest a significant accumulation of nitrogen in the Mediterranean basin over the century when phosphorus fluxes can be considered roughly stable. The strong decrease in sedimentation (Figure 6) occurring in spite of an enhancement in nutrient flux, coming from the Atlantic and an enhanced nitrate river flux may be linked to the decrease in vertical water fluxes. This would explain the accumulation of phosphate and nitrate in the deep layers of the Mediterranean Sea (Figures 7c, 7f,8c and 8f). The difference between HIS/A2 and CTRL\_RG phosphate concentrations (Figure 7) indicates that the variations of phosphate concentrations during the 21st century are primarily linked with climate change whereas nitrate concentration seems equally sensitive to changes in biogeochemical forcings. To our knowledge, this is the first attempt to study the basin-scale biogeochemical evolution using a transient business-as-usual (A2) climate change scenario. Lazzari et al. (2014) tested the effects of several land-use change scenarios on the A1B SRES climate change scenario over 10-years time slices. They found a general decrease in phytoplankton and zooplankton biomasses (about 5 %) that is lower than in our severe climate change scenario. In our simulations, average phytoplankton biomass decreases by about 2 to 30 % (see Figure 15 and average zooplankton biomass decreases by about 8 and 12 % (see Figure 16. However, our transient simulations revealed non linear trends

in plankton biomass evolution. Lazzari et al. (2014) also conclude that the river mouth regions are highly sensitive because the Mediterranean Sea is influenced by external nutrient inputs. Our results  
695 show the same sensitivity of the Mediterranean to external nutrient inputs. Herrmann et al. (2014) studied the transient biogeochemical evolution of the northwestern Mediterranean Sea under the A2 and A1B scenarios with the coupled ECO3M–S/SYMPHONIE model. But they used present–day conditions for biogeochemical forcings, as did Macias et al. (2015). Results from Herrmann et al. (2014) indicate that chlorophyll concentration and plankton biomass in the northwestern Mediterranean  
700 increase slightly as a result of vertical stratification. Our results indicate that the contrasting effects of vertical stratification biogeochemical changes may lead to a decrease in chlorophyll concentration, phytoplankton and zooplankton biomass content of up to 50 % locally and between 2 and 30 % at the basin scale as indicated by Figures 14, 15 and 16. The modifications of chlorophyll production and plankton biomass are linked to changes in nutrient limitation (Figure 12). Our finding that most of the  
705 Mediterranean basin is N and P co–limited seems in contrast with previous literature on the matter (see Krom et al., 2004, 2010; Pujo-Pay et al., 2011, and references therein). These authors found from analyses of the N:P ratio of the waters a clear phosphorus limitation in the major part of the Mediterranean. The discrepancy between our results and literature estimates comes from the way we calculate nutrient limitations. Considering how low nutrient concentrations are in the Mediterranean  
710 and how low the nutrient limitation factors are, the small difference between the limitation factors indicate that the Mediterranean is both limited in P and N. Finding no clear definition of nutrient co–limitation, we propose to consider that N and P are co-limiting when the difference in limitation factors is less than 1 %. This definition of nutrient co–limitation applies well to the Mediterranean case because of the very low nutrient concentrations. Chust et al. (2014) have shown that regional  
715 seas and in particular the Aegean and Adriatic were sensitive to trophic amplification. Our results seem to agree with these conclusions by showing sign of trophic amplification (see Figures 15 and 16). Finally, Luna et al. (2012) hypothesise that the warm temperature of the deep Mediterranean may be a cause for important nutrient recycling via prokaryotic metabolism. In the version of PISCES used in this study, nutrient recycling is dependant on oxygen, depth, plankton biomass and  
720 bacterial activity. Therefore, we could not observe the effects of temperature on nutrient recycling. Results from our different control simulations indicates the extent to which the choice of the biogeochemical forcing scenario may influence the future evolution of the Mediterranean Sea biogeochemistry. In particular, nutrient inputs through the Strait of Gibraltar have substantial consequences on the western basin. Results from Figures 7a and 8a and Table 4 indicate that the increase in nutrient  
725 inputs through the Strait of Gibraltar at the end of the century is responsible for a 2.5 % increase in chlorophyll concentration in the western basin during the 2080–2099 period. Moreover, climate and nutrient forcing changes may have contrasting influences on the Mediterranean Sea biogeochemistry. Stratification may lead to increased productivity in the surface because of the nutrient concentration

increase (see also Macias et al., 2015), while decreasing coastal discharges of phosphate may decrease  
730 the productivity in the basin.

## Conclusion

This study aims at assessing the transient effects of climate and biogeochemical changes on the Mediterranean Sea biogeochemistry under the high-emission IPCC A2 scenario. The NEMOMED8/PISCES model adequately reproduces the main characteristics of the Mediterranean Sea: the west-to-east  
735 gradient of productivity, the main productive zones and the presence of a DCM. Hence, it appears reasonable to use it to study the future evolution of the biogeochemistry of the Mediterranean basin in response to increasing atmospheric CO<sub>2</sub> and resulting climate change. For the first time, we performed a continuous simulation over the entire period of the future IPCC scenario (A2), between 1980 and 2099.

740 This study illustrates how future changes in physical and biogeochemical conditions, including warming, increased stratification, and changes in Atlantic and river inputs, can lead to a significant accumulation of nitrate and a decrease in biological productivity in the surface, thus affecting the entire Mediterranean ecosystem.

Our results also illustrate how climate change and nutrient inputs from riverine sources and fluxes  
745 through the Strait of Gibraltar have contrasted influences on the Mediterranean Sea productivity. In particular, the biogeochemistry in the western basin displays similar nutrient trends as does its input across the Strait of Gibraltar. Therefore, it appears critical to correctly represent the future variations of external biogeochemical forcings of the Mediterranean Sea as they may have equally important influence on biogeochemical cycles as climate. The biogeochemistry of the eastern basin is more  
750 sensitive to vertical mixing and river inputs than the western basin (that receives regulating effects from exchanges through the Strait of Gibraltar) and the stratification observed in the future leads to a reduction in surface productivity.

Finally, this study accounts for the changes in fluxes through the Strait of Gibraltar and riverine inputs, but some potentially important sources are missing such as direct wastewater discharge,  
755 submarine groundwater and atmospheric deposition. Measurements and models are still missing in order to include comprehensive datasets for past and future evolution of these nutrient sources. The HIS/A2\_N and HIS/A2\_NALADIN simulations presented in the discussion section include continued present-day nitrogen and phosphate deposition. Although these atmospheric fluxes have been evaluated previously and were shown to represent correctly the deposition fluxes, there is no  
760 guarantee that these fluxes are going to remain consistent over the next century. Results showed that the future sensitivity of the Mediterranean to atmospheric deposition depends on the surface nutrient limitations. However, there is to our knowledge no available transient scenario for the 21st century evolution of atmospheric deposition and no ensemble simulations to assess the future evolution of

the Mediterranean Sea under different climate change scenarios. A new generation of fully coupled  
765 regional models have been developed and used to study aerosols climatic impacts (Nabat et al.,  
2015). These models include a representation of the ocean, atmosphere, aerosols and rivers and  
should be used to perform future climate projections consistent at the Mediterranean regional scale.

### **acknowledgments**

The authors would like to thank Florence Sevault for the physical simulations of NEMOMED8,  
770 Pierre Nabat for the dust deposition with ALADIN-Climat, Yves Balkanski and Rong Wang for the  
N deposition with the LMDz-INCA model and Wolfgang Ludwig for the river inputs. This work was  
founded by CEA (C. Richon PhD grant) and is part of the MISTRALS project.

### **Appendix A: Evaluation of the NEMOMED8/PISCES model**

The comparison of modeled surface chlorophyll-*a* concentration with satellite estimates has revealed  
775 that the model correctly simulates the main characteristics observed in the Mediterranean Sea (Figures 1  
and 2). Comparison with in situ observation provides more refined estimates.

Figure A1 presents the average chlorophyll-*a* profiles at the DYFAMED station (43.25°N, 7.52°E)  
compared with measured concentrations for the month of February (low stratification, high productivity)  
780 and May (end of spring bloom, beginning of stratification and DCM appearance). There are few  
data points below 200 m. The model produces the characteristic of the deep chlorophyll maximum  
generated in May, even if its depth is too important. The colors show that the model represents some  
interannual variability in chlorophyll production in spite of the consistent bias.

785 The overestimation of the DCM depth may be due to the overestimation of nitracline and phosphacline  
as shown by figure A2. This Figure shows the vertical profiles of nitrate and phosphate at the  
DYFAMED station in May, colors represent the different years in the model and in the observation.

The vertical distribution of nitrate and phosphate concentrations along a West-to-East transect is  
790 shown in Figure A3. The model produces the salient West-to-East gradient of nutrient concentrations.  
Concentrations in the surface layer seem correct. The nutricline is located 100 to 150 m deep in the  
western basin and deepens around 180 to 200 m in the eastern basin. Although the model represents  
the spatial variability of the nutricline, it is too smooth, leading to the underestimation of deep water  
concentrations (by about 30 to 50 %).

795

## References

- Adloff, F., Somot, S., Sevault, F., Jordà, G., Aznar, R., Déqué, M., Herrmann, M., Marcos, M., Dubois, C., Padorno, E., Alvarez-Fanjul, E., and Gomis, D.: Mediterranean Sea response to climate change in an ensemble of twenty first century scenarios, *Climate Dynamics*, 45, 2775–2802, doi:10.1007/s00382-015-2507-3, <http://link.springer.com/article/10.1007/s00382-015-2507-3>, 2015.
- 800 Albouy, C., Leprieur, F., Le Loc'h, F., Mouquet, N., Meynard, C. N., Douzery, E. J. P., and Mouillot, D.: Projected impacts of climate warming on the functional and phylogenetic components of coastal Mediterranean fish biodiversity, *Ecography*, 38, 681–689, doi:10.1111/ecog.01254, <http://doi.wiley.com/10.1111/ecog.01254>, 2015.
- 805 Andrello, M., Mouillot, D., Somot, S., Thuiller, W., and Manel, S.: Additive effects of climate change on connectivity between marine protected areas and larval supply to fished areas, *Diversity and Distributions*, 21, 139–150, doi:10.1111/ddi.12250, <http://onlinelibrary.wiley.com/doi/10.1111/ddi.12250/abstract>, 2015.
- Auger, P. A., Ulses, C., Estournel, C., Stemann, L., Somot, S., and Diaz, F.: Interannual control of plankton communities by deep winter mixing and prey/predator interactions in the NW Mediterranean: Results from a 30-year 3D modeling study, *Progress in Oceanography*, 124, 12–27, doi:10.1016/j.pocean.2014.04.004, <http://www.sciencedirect.com/science/article/pii/S007966114000524>, 2014.
- 810 Aumont, O. and Bopp, L.: Globalizing results from ocean in situ iron fertilization studies: GLOBALIZING IRON FERTILIZATION, *Global Biogeochemical Cycles*, 20, n/a–n/a, doi:10.1029/2005GB002591, <http://doi.wiley.com/10.1029/2005GB002591>, 2006.
- 815 Beuvier, J., Sevault, F., Herrmann, M., Kontoyiannis, H., Ludwig, W., Rixen, M., Stanev, E., Béranger, K., and Somot, S.: Modeling the Mediterranean Sea interannual variability during 1961–2000: Focus on the Eastern Mediterranean Transient, *Journal of Geophysical Research: Oceans*, 115, C08017, doi:10.1029/2009JC005950, <http://onlinelibrary.wiley.com/doi/10.1029/2009JC005950/abstract>, 2010.
- Bonnet, S., Grosso, O., and Moutin, T.: Planktonic dinitrogen fixation along a longitudinal gradient across the Mediterranean Sea during the stratified period (BOUM cruise), *Biogeosciences*, 8, 2257–2267, doi:10.5194/bg-8-2257-2011, <http://www.biogeosciences.net/8/2257/2011/>, 2011.
- 820 Bosc, E., Bricaud, A., and Antoine, D.: Seasonal and interannual variability in algal biomass and primary production in the Mediterranean Sea, as derived from 4 years of SeaWiFS observations: MEDITERRANEAN SEA BIOMASS AND PRODUCTION, *Global Biogeochemical Cycles*, 18, n/a–n/a, doi:10.1029/2003GB002034, <http://doi.wiley.com/10.1029/2003GB002034>, 2004.
- 825 Béthoux, J. P. and Copin-Montégut, G.: Biological fixation of atmospheric nitrogen in the Mediterranean Sea, *Limnology and Oceanography*, 31, 1353–1358, doi:10.4319/lo.1986.31.6.1353, <http://onlinelibrary.wiley.com/doi/10.4319/lo.1986.31.6.1353/abstract>, 1986.
- Béthoux, J. P., Morin, P., Chaumery, C., Connan, O., Gentili, B., and Ruiz-Pino, D.: Nutrients in the Mediterranean Sea, mass balance and statistical analysis of concentrations with respect to environmental change, *Marine Chemistry*, 63, 155–169, doi:10.1016/S0304-4203(98)00059-0, <http://www.sciencedirect.com/science/article/pii/S0304420398000590>, 1998.
- 830 Christodoulaki, S., Petihakis, G., Kanakidou, M., Mihalopoulos, N., Tsiaras, K., and Triantafyllou, G.: Atmospheric deposition in the Eastern Mediterranean. A driving force for ecosystem dynamics, *Journal*



- 835 of Marine Systems, 109-110, 78-93, doi:10.1016/j.jmarsys.2012.07.007, <http://linkinghub.elsevier.com/retrieve/pii/S0924796312001583>, 2013.
- Chust, G., Allen, J. I., Bopp, L., Schrum, C., Holt, J., Tsiaras, K., Zavatarelli, M., Chifflet, M., Cannaby, H., Dadou, I., Daewel, U., Wakelin, S. L., Machu, E., Pushpadas, D., Butenschon, M., Artioli, Y., Petihakis, G., Smith, C., Garçon, V., Goubanova, K., Vu, B. L., Fach, B. A., Salihoglu, B., Clementi, E., and Irigoien, X.: Biomass changes and trophic amplification of plankton in a warmer ocean, *Global Change Biology*, 20, 2124-2139, doi:10.1111/gcb.12562, <https://onlinelibrary.wiley.com/doi/abs/10.1111/gcb.12562>, 2014.
- 840 Civitarese, G., Gacic, M., Lipizer, M., and Borzelli, G. L. E.: On the impact of the Bimodal Oscillating System (BiOS) on the biogeochemistry and biology of the Adriatic and Ionian Seas (Eastern Mediterranean), *Biogeosciences*, 7, 3987-3997, doi:10.5194/bg-7-3987-2010, wOS:000285574100006, 2010.
- 845 Claustre, H., Morel, A., Hooker, S. B., Babin, M., Antoine, D., Oubelkheir, K., Bricaud, A., Leblanc, K., Quéguiner, B., and Maritorena, S.: Is desert dust making oligotrophic waters greener?, *Geophysical Research Letters*, 29, 107-1-107-4, doi:10.1029/2001GL014056, <https://agupubs.onlinelibrary.wiley.com/doi/abs/10.1029/2001GL014056>, 2002.
- Cork, S., Peterson, G., Petschel-Held, G., Alcamo, J., Alder, J., Bennett, E., Carr, E., Deane, D., Nelson, G., Ribeiro, T., and others: Four scenarios, Ecosystems and human well-being: Scenarios, 2, [http://www.academia.edu/download/31005604/Millennium\\_assessment.pdf](http://www.academia.edu/download/31005604/Millennium_assessment.pdf), 2005.
- 850 Crispi, G., Mosetti, R., Solidoro, C., and Crise, A.: Nutrients cycling in Mediterranean basins: the role of the biological pump in the trophic regime, *Ecological Modelling*, 138, 101-114, doi:10.1016/S0304-3800(00)00396-3, <http://www.sciencedirect.com/science/article/pii/S0304380000003963>, 2001.
- 855 d'Ortenzio, F. and Ribera d'Alcalà, M.: On the trophic regimes of the Mediterranean Sea: a satellite analysis, *Biogeosciences*, 6, 139-148, <http://www.biogeosciences.net/6/139/2009/bg-6-139-2009.html>, 2009.
- Déqué, M., Dreveton, C., Braun, A., and Cariolle, D.: The ARPEGE/IFS atmosphere model: a contribution to the French community climate modelling, *Climate dynamics*, 10, 249-266, <http://cat.inist.fr/?aModele=afficheN&cpsid=4250659>, 1994.
- 860 Dubois, C., Somot, S., Calmanti, S., Carillo, A., Déqué, M., Dell'Aquila, A., Elizalde, A., Gualdi, S., Jacob, D., L'Hévéder, B., Li, L., Oddo, P., Sannino, G., Scoccimarro, E., and Sevault, F.: Future projections of the surface heat and water budgets of the Mediterranean Sea in an ensemble of coupled atmosphere-ocean regional climate models, *Climate Dynamics*, 39, 1859-1884, doi:10.1007/s00382-011-1261-4, <http://adsabs.harvard.edu/abs/2012CIDy...39.1859D>, 2012.
- 865 Dufresne, J.-L., Foujols, M.-A., Denvil, S., Caubel, A., Marti, O., Aumont, O., Balkanski, Y., Bekki, S., Bellenger, H., Benshila, R., Bony, S., Bopp, L., Braconnot, P., Brockmann, P., Cadule, P., Cheruy, F., Codron, F., Cozic, A., Cugnet, D., Noblet, N. d., Duvel, J.-P., Ethé, C., Fairhead, L., Fichefet, T., Flavoni, S., Friedlingstein, P., Grandpeix, J.-Y., Guez, L., Guilyardi, E., Hauglustaine, D., Hourdin, F., Idelkadi, A., Ghattas, J., Joussaume, S., Kageyama, M., Krinner, G., Labetoulle, S., Lahellec, A., Lefebvre, M.-P., Lefevre, F., Levy, C., Li, Z. X., Lloyd, J., Lott, F., Madec, G., Mancip, M., Marchand, M., Masson, S., Meurdesoif, Y., Mignot, J., Musat, I., Parouty, S., Polcher, J., Rio, C., Schulz, M., Swingedouw, D., Szopa, S., Talandier, C., Terray, P., Viovy, N., and Vuichard, N.: Climate change projections using the IPSL-CM5 Earth System Model: from CMIP3 to CMIP5, *Climate Dynamics*, 40, 2123-2165, doi:10.1007/s00382-012-1636-1, <https://link.springer.com/article/10.1007/s00382-012-1636-1>, 2013.

- 875 Dulac, F., BUAT-MÉNARD, P., Ezat, U., Melki, S., and Bergametti, G.: Atmospheric input of trace metals to the western Mediterranean: uncertainties in modelling dry deposition from cascade impactor data, *Tellus B*, 41, 362–378, <http://onlinelibrary.wiley.com/doi/10.1111/j.1600-0889.1989.tb00315.x/full>, 1989.
- Dunić, N., Vilibić, I., Šepić, J., Somot, S., and Sevault, F.: Dense water formation and BiOS-induced variability in the Adriatic Sea simulated using an ocean regional circulation model, *Climate Dynamics*, 880 doi:10.1007/s00382-016-3310-5, <http://link.springer.com/10.1007/s00382-016-3310-5>, 2016.
- Faugeras, B., Lévy, M., Mémery, L., Verron, J., Blum, J., and Charpentier, I.: Can biogeochemical fluxes be recovered from nitrate and chlorophyll data? A case study assimilating data in the Northwestern Mediterranean Sea at the JGOFS-DYFAMED station, *Journal of Marine Systems*, 40-41, 99–125, doi:10.1016/S0924-7963(03)00015-0, <http://www.sciencedirect.com/science/article/pii/S0924796303000150>, 2003.
- 885 Fichaut, M., Garcia, M. J., Giorgetti, A., Iona, A., Kuznetsov, A., Rixen, M., and Group, M.: MEDAR/MEDATLAS 2002: A Mediterranean and Black Sea database for operational oceanography, in: Elsevier Oceanography Series, edited by H. Dahlin, K. Nittis and S. E. Petersson, N. C. F., vol. 69 of *Building the European Capacity in Operational Oceanography Proceedings of the Third International Conference on EuroGOOS*, pp. 645–648, Elsevier, <http://www.sciencedirect.com/science/article/pii/S0422989403801071>, 2003.
- 890 Gallisai, R., Peters, F., Volpe, G., Basart, S., and Baldasano, J. M.: Saharan Dust Deposition May Affect Phytoplankton Growth in the Mediterranean Sea at Ecological Time Scales, *PLoS ONE*, 9, e110762, doi:10.1371/journal.pone.0110762, <http://dx.plos.org/10.1371/journal.pone.0110762>, 2014.
- 895 Gibelin, A.-L. and Déqué, M.: Anthropogenic climate change over the Mediterranean region simulated by a global variable resolution model, *Climate Dynamics*, 20, 327–339, doi:10.1007/s00382-002-0277-1, <https://link.springer.com/article/10.1007/s00382-002-0277-1>, 2003.
- Giorgi, F.: Climate change hot-spots, *Geophysical Research Letters*, 33, L08 707, doi:10.1029/2006GL025734, <http://onlinelibrary.wiley.com/doi/10.1029/2006GL025734/abstract>, 2006.
- 900 Giorgi, F. and Lionello, P.: Climate change projections for the Mediterranean region, *Global and Planetary Change*, 63, 90–104, doi:10.1016/j.gloplacha.2007.09.005, <http://www.sciencedirect.com/science/article/pii/S0921818107001750>, 2008.
- Gómez, F.: The role of the exchanges through the Strait of Gibraltar on the budget of elements in the Western Mediterranean Sea: consequences of human-induced modifications, *Marine Pollution Bulletin*, 46, 685–694, doi:10.1016/S0025-326X(03)00123-1, <http://www.sciencedirect.com/science/article/pii/S0025326X03001231>, 2003.
- 905 Guieu, C., Ridame, C., Pulido-Villena, E., Bressac, M., Desboeufs, K., and Dulac, F.: Dust deposition in an oligotrophic marine environment: impact on the carbon budget, *Biogeosciences Discussions*, 11, 1707–1738, doi:10.5194/bgd-11-1707-2014, <http://www.biogeosciences-discuss.net/11/1707/2014/>, 2014.
- 910 Harley, C. D. G., Randall Hughes, A., Hultgren, K. M., Miner, B. G., Sorte, C. J. B., Thornber, C. S., Rodriguez, L. F., Tomanek, L., and Williams, S. L.: The impacts of climate change in coastal marine systems, *Ecology Letters*, 9, 228–241, doi:10.1111/j.1461-0248.2005.00871.x, <http://onlinelibrary.wiley.com/doi/10.1111/j.1461-0248.2005.00871.x/abstract>, 2006.

- Hattab, T., Albouy, C., Lasram, F. B. R., Somot, S., Le Loc'h, F., and Leprieur, F.: Towards a better understanding of potential impacts of climate change on marine species distribution: a multiscale modelling approach, *Global Ecology and Biogeography*, 23, 1417–1429, doi:10.1111/geb.12217, <http://onlinelibrary.wiley.com/doi/10.1111/geb.12217/abstract>, 2014.
- Herrmann, M., Sevault, F., Beuvier, J., and Somot, S.: What induced the exceptional 2005 convection event in the northwestern Mediterranean basin? Answers from a modeling study, *Journal of Geophysical Research: Oceans*, 115, C12 051, doi:10.1029/2010JC006162, <http://onlinelibrary.wiley.com/doi/10.1029/2010JC006162/abstract>, 2010.
- Herrmann, M., Diaz, F., Estournel, C., Marsaleix, P., and Ulses, C.: Impact of atmospheric and oceanic interannual variability on the Northwestern Mediterranean Sea pelagic planktonic ecosystem and associated carbon cycle, *Journal of Geophysical Research: Oceans*, 118, 5792–5813, doi:10.1002/jgrc.20405, <http://onlinelibrary.wiley.com/doi/10.1002/jgrc.20405/abstract>, 2013.
- Herrmann, M., Estournel, C., Adloff, F., and Diaz, F.: Impact of climate change on the northwestern Mediterranean Sea pelagic planktonic ecosystem and associated carbon cycle, *Journal of Geophysical Research: Oceans*, 119, 5815–5836, doi:10.1002/2014JC010016, <http://onlinelibrary.wiley.com/doi/10.1002/2014JC010016/abstract>, 2014.
- Huertas, I. E., Ríos, A. F., García-Lafuente, J., Navarro, G., Makaoui, A., Sánchez-Román, A., Rodríguez-Galvez, S., Orbi, A., Ruíz, J., and Pérez, F. F.: Atlantic forcing of the Mediterranean oligotrophy, *Global Biogeochemical Cycles*, 26, GB2022, doi:10.1029/2011GB004167, <http://onlinelibrary.wiley.com/doi/10.1029/2011GB004167/abstract>, 2012.
- Ibello, V., Cantoni, C., Cozzi, S., and Civitarese, G.: First basin-wide experimental results on N<sub>2</sub> fixation in the open Mediterranean Sea, *Geophysical Research Letters*, 37, L03 608, doi:10.1029/2009GL041635, <http://onlinelibrary.wiley.com/doi/10.1029/2009GL041635/abstract>, 2010.
- IPCC: *Managing the Risks of Extreme Events and Disasters to Advance Climate Change Adaptation. A Special Report of Working Groups I and II of the Intergovernmental Panel on Climate Change*, Cambridge University Press, Cambridge, United Kingdom, and New York, NY, USA, 2012.
- IPCC and Working Group III: *Emissions scenarios. a special report of IPCC Working Group III, Intergovernmental Panel on Climate Change*, Geneva, <http://catalog.hathitrust.org/api/volumes/oclc/59436339.html>, oCLC: 891560334, 2000.
- Jordà, G., Marbà, N., and Duarte, C. M.: Mediterranean seagrass vulnerable to regional climate warming, *Nature Climate Change*, 2, 821–824, doi:10.1038/nclimate1533, <http://www.nature.com/nclimate/journal/v2/n11/abs/nclimate1533.html?foxtrotcallback=true>, 2012.
- Klein, B., Roether, W., Kress, N., Manca, B. B., Ribera d'Alcala, M., Souvermezoglou, E., Theocharis, A., Civitarese, G., and Luchetta, A.: Accelerated oxygen consumption in eastern Mediterranean deep waters following the recent changes in thermohaline circulation, *Journal of Geophysical Research: Oceans*, 108, 8107, doi:10.1029/2002JC001454, <http://onlinelibrary.wiley.com/doi/10.1029/2002JC001454/abstract>, 2003.
- Krom, M. D., Herut, B., and Mantoura, R. F. C.: Nutrient budget for the Eastern Mediterranean: Implications for phosphorus limitation, *Limnology and Oceanography*, 49, 1582–1592, doi:10.4319/lo.2004.49.5.1582, <https://aslopubs.onlinelibrary.wiley.com/doi/abs/10.4319/lo.2004.49.5.1582>, 2004.

- Krom, M. D., Emeis, K.-C., and Van Cappellen, P.: Why is the Eastern Mediterranean phosphorus limited?, *Progress in Oceanography*, 85, 236–244, doi:10.1016/j.pocean.2010.03.003, <http://www.sciencedirect.com/science/article/pii/S0079661110000340>, 2010.
- Lascaratos, A., Roether, W., Nittis, K., and Klein, B.: Recent changes in deep water formation and spreading in the eastern Mediterranean Sea: a review, *Progress in Oceanography*, 44, 5–36, doi:10.1016/S0079-6611(99)00019-1, <http://www.sciencedirect.com/science/article/pii/S0079661199000191>, 1999.
- 960 Lazzari, P., Mattia, G., Solidoro, C., Salon, S., Crise, A., Zavatarelli, M., Oddo, P., and Vichi, M.: The impacts of climate change and environmental management policies on the trophic regimes in the Mediterranean Sea: Scenario analyses, *Journal of Marine Systems*, 135, 137–149, doi:10.1016/j.jmarsys.2013.06.005, <http://linkinghub.elsevier.com/retrieve/pii/S0924796313001425>, 2014.
- Lefort, S., Aumont, O., Bopp, L., Arsouze, T., Gehlen, M., and Maury, O.: Spatial and body-size dependent response of marine pelagic communities to projected global climate change, *Global Change Biology*, 21, 154–164, doi:10.1111/gcb.12679, <http://onlinelibrary.wiley.com/doi/10.1111/gcb.12679/abstract>, 2015.
- Locarnini, R. A., Garcia, H. E., Boyer, T. P., Antonov, J. I., and Levitus, S.: World Ocean Atlas 2005, Volume 3: Dissolved Oxygen, Apparent Oxygen Utilization, and Oxygen Saturation [+DVD], NOAA Atlas NESDIS, <http://www.vliz.be/nl/imis?module=ref&refid=117383&printversion=1&dropIMISitle=1>, 2006.
- 970 Ludwig, W., Dumont, E., Meybeck, M., and Heussner, S.: River discharges of water and nutrients to the Mediterranean and Black Sea: Major drivers for ecosystem changes during past and future decades?, *Progress in Oceanography*, 80, 199–217, doi:10.1016/j.pocean.2009.02.001, <http://linkinghub.elsevier.com/retrieve/pii/S0079661109000020>, 2009.
- Ludwig, W., Bouwman, A. F., Dumont, E., and Lespinas, F.: Water and nutrient fluxes from major Mediterranean and Black Sea rivers: Past and future trends and their implications for the basin-scale budgets, *Global Biogeochemical Cycles*, 24, GB0A13, doi:10.1029/2009GB003594, <http://onlinelibrary.wiley.com/doi/10.1029/2009GB003594/abstract>, 2010.
- Luna, G. M., Bianchelli, S., Decembrini, F., Domenico, E. D., Danovaro, R., and Dell’Anno, A.: The dark portion of the Mediterranean Sea is a bioreactor of organic matter cycling, *Global Biogeochemical Cycles*, 26, doi:10.1029/2011GB004168, <https://agupubs.onlinelibrary.wiley.com/doi/abs/10.1029/2011GB004168>, 2012.
- Macias, D. M., Garcia-Gorrioz, E., and Stips, A.: Productivity changes in the Mediterranean Sea for the twenty-first century in response to changes in the regional atmospheric forcing, *Frontiers in Marine Science*, 2, doi:10.3389/fmars.2015.00079, <https://www.frontiersin.org/articles/10.3389/fmars.2015.00079/full>, 2015.
- 985 Madec, G.: NEMO ocean engine, <http://eprints.soton.ac.uk/64324/>, 2008.
- Marty, J.-C., Chiavérini, J., Pizay, M. D., and Avril, B.: Seasonal and interannual dynamics of nutrients and phytoplankton pigments in the western Mediterranean Sea at the DYFAMED time-series station (1991–1999), *Deep-Sea Research, Part II. Topical Studies in Oceanography*, <http://www.vliz.be/en/imis?module=ref&refid=39389&printversion=1&dropIMISitle=1>, 2002.
- 990 Monod, J.: *Recherches sur la croissance des cultures bactériennes*, Hermann, 1958.
- Morel, A. and Gentili, B.: Yellow substance and the shades of blue in the Mediterranean Sea, *Biogeosciences Discussions*, 6, 8503–8530, <http://adsabs.harvard.edu/abs/2009BGD.....6.8503M>, 2009.

- Moutin, T., Van Wambeke, F., and Prieur, L.: Introduction to the Biogeochemistry from the Oligotrophic to the Ultraoligotrophic Mediterranean (BOUM) experiment, *Biogeosciences*, 9, 3817–3825, doi:10.5194/bg-9-3817-2012, <http://www.biogeosciences.net/9/3817/2012/>, 2012.
- 995 Nabat, P., Somot, S., Mallet, M., Sevault, F., Chiacchio, M., and Wild, M.: Direct and semi-direct aerosol radiative effect on the Mediterranean climate variability using a coupled regional climate system model, *Climate Dynamics*, 44, 1127–1155, doi:10.1007/s00382-014-2205-6, <https://link.springer.com/article/10.1007/s00382-014-2205-6>, 2015.
- 1000 Nittis, K., Lascaratos, A., and Theocharis, A.: Dense water formation in the Aegean Sea: Numerical simulations during the Eastern Mediterranean Transient, *Journal of Geophysical Research: Oceans*, 108, 8120, doi:10.1029/2002JC001352, <http://onlinelibrary.wiley.com/doi/10.1029/2002JC001352/abstract>, 2003.
- Palmieri, J., Orr, J. C., Dutay, J.-C., Béranger, K., Schneider, A., Beuvier, J., and Somot, S.: Simulated anthropogenic CO<sub>2</sub> storage and acidification of the Mediterranean Sea, *Biogeosciences*, 12, 781–802, doi:10.5194/bg-12-781-2015, <http://www.biogeosciences.net/12/781/2015/>, 2015.
- 1005 Powley, H. R., Dürr, H. H., Lima, A. T., Krom, M. D., and Van Cappellen, P.: Direct Discharges of Domestic Wastewater are a Major Source of Phosphorus and Nitrogen to the Mediterranean Sea, <https://core.ac.uk/display/74234820>, 2016.
- Powley, H. R., Krom, M. D., and Cappellen, P. V.: Understanding the unique biogeochemistry of the Mediterranean Sea: Insights from a coupled phosphorus and nitrogen model, *Global Biogeochemical Cycles*, 31, 1010–1031, doi:10.1002/2017GB005648, <https://agupubs.onlinelibrary.wiley.com/doi/abs/10.1002/2017GB005648>, 2017.
- 1010 Pujó-Pay, M., Conan, P., Oriol, L., Cornet-Barthaux, V., Falco, C., Ghiglione, J.-F., Goyet, C., Moutin, T., and Prieur, L.: Integrated survey of elemental stoichiometry (C, N, P) from the western to eastern Mediterranean Sea, *Biogeosciences*, 8, 883–899, doi:10.5194/bg-8-883-2011, <http://www.biogeosciences.net/8/883/2011/>, 2011.
- 1015 Redfield, A. C., Ketchum, B. H., and Richards, F. A.: The influence of organisms on the composition of seawater, *The sea: ideas and observations on progress in the study of the seas*, <http://www.vliz.be/en/imis?module=ref&refid=28944&printversion=1&dropIMISitle=1>, 1963.
- 1020 Richon, C., Dutay, J.-C., Dulac, F., Wang, R., Balkanski, Y., Nabat, P., Aumont, O., Desboeufs, K., Laurent, B., Guieu, C., Raimbault, P., and Beuvier, J.: Modeling the impacts of atmospheric deposition of nitrogen and desert dust-derived phosphorus on nutrients and biological budgets of the Mediterranean Sea, *Progress in Oceanography*, doi:10.1016/j.pocean.2017.04.009, <http://www.sciencedirect.com/science/article/pii/S0079661116301811>, 2017.
- 1025 Richon, C., Dutay, J.-C., Dulac, F., Wang, R., and Balkanski, Y.: Modeling the biogeochemical impact of atmospheric phosphate deposition from desert dust and combustion sources to the Mediterranean Sea, *Biogeosciences*, 15, 2499–2524, doi:10.5194/bg-15-2499-2018, <https://www.biogeosciences.net/15/2499/2018/>, 2018.
- 1030 Robinson, A. R., Leslie, W. G., Theocharis, A., and Lascaratos, A.: Mediterranean Sea Circulation, in: *Encyclopedia of Ocean Sciences (Second Edition)*, edited by Steele, J. H., pp. 710–725, Academic Press, Oxford, doi:10.1016/B978-012374473-9.00376-3, <http://www.sciencedirect.com/science/article/pii/B9780123744739003763>, 2001.

- Rodellas, V., Garcia-Orellana, J., Masqué, P., Feldman, M., and Weinstein, Y.: Submarine groundwater discharge as a major source of nutrients to the Mediterranean Sea, *Proceedings of the National Academy of Sciences*, 112, 3926–3930, doi:10.1073/pnas.1419049112, <http://www.pnas.org/content/112/13/3926>, 2015.
- 1035 Roether, W., Klein, B., and Hainbucher, D.: The Eastern Mediterranean Transient, in: *The Mediterranean Sea*, edited by Borzelli, G. L. E., Gačić, M., Lionello, P., and Paolalanotte-Rizzoli, pp. 75–83, John Wiley & Sons, Inc., <http://onlinelibrary.wiley.com/doi/10.1002/9781118847572.ch6/summary>, 2014.
- Rohling, E. J.: Shoaling of the Eastern Mediterranean Pycnocline due to reduction of excess evaporation: Implications for sapropel formation, *Paleoceanography*, 6, 747–753, doi:10.1029/91PA02455, <http://onlinelibrary.wiley.com/doi/10.1029/91PA02455/abstract>, 1991.
- 1040 Rohling, E. J.: Review and new aspects concerning the formation of eastern Mediterranean sapropels, *Marine Geology*, 122, 1–28, doi:10.1016/0025-3227(94)90202-X, <http://www.sciencedirect.com/science/article/pii/002532279490202X>, 1994.
- 1045 Rossignol-Strick, M., Nesteroff, W., Olive, P., and Vergnaud-Grazzini, C.: After the deluge: Mediterranean stagnation and sapropel formation, *Nature*, 295, 105–110, doi:10.1038/295105a0, <http://www.nature.com/nature/journal/v295/n5845/abs/295105a0.html>, 1982.
- Royer, J.-F., Cariolle, D., Chauvin, F., Déqué, M., Douville, H., Hu, R.-M., Planton, S., Rascol, A., Ricard, J.-L., Salas Y Melia, D., Sevault, F., Simon, P., Somot, S., Tyteca, S., Terray, L., and Valcke, S.: Simulation des changements climatiques au cours du XXI<sup>e</sup> siècle incluant l’ozone stratosphérique, *Comptes Rendus Geoscience*, 334, 147–154, doi:10.1016/S1631-0713(02)01728-5, <http://www.sciencedirect.com/science/article/pii/S1631071302017285>, 2002.
- 1050 Ruti, P. M., Somot, S., Giorgi, F., Dubois, C., Flaouas, E., Obermann, A., Dell’Aquila, A., Pisacane, G., Harzallah, A., Lombardi, E., Ahrens, B., Akhtar, N., Alias, A., Arsouze, T., Aznar, R., Bastin, S., Bartholy, J., Béranger, K., Beuvier, J., Bouffies-Cloché, S., Brauch, J., Cabos, W., Calmanti, S., Calvet, J.-C., Carillo, A., Conte, D., Coppola, E., Djurdjevic, V., Drobinski, P., Elizalde-Arellano, A., Gaertner, M., Galàn, P., Gallardo, C., Gualdi, S., Goncalves, M., Jorba, O., Jordà, G., L’Heveder, B., Lebeau-pin-Brossier, C., Li, L., Liguori, G., Lionello, P., Maciàs, D., Nabat, P., Öno, B., Raikovic, B., Ramage, K., Sevault, F., Sannino, G., Struglia, M. V., Sanna, A., Torma, C., and Vervatis, V.: Med-CORDEX Initiative for Mediterranean
- 1060 Climate Studies, *Bulletin of the American Meteorological Society*, 97, 1187–1208, doi:10.1175/BAMS-D-14-00176.1, <https://journals.ametsoc.org/doi/abs/10.1175/BAMS-D-14-00176.1>, 2015.
- Sanchez-Gomez, E., Somot, S., and Mariotti, A.: Future changes in the Mediterranean water budget projected by an ensemble of regional climate models, *Geophysical Research Letters*, 36, L21401, doi:10.1029/2009GL040120, <http://onlinelibrary.wiley.com/doi/10.1029/2009GL040120/abstract>, 2009.
- 1065 Santinelli, C., Ibello, V., Lavezza, R., Civitarese, G., and Seritti, A.: New insights into C, N and P stoichiometry in the Mediterranean Sea: The Adriatic Sea case, *Continental Shelf Research*, 44, 83–93, doi:10.1016/j.csr.2012.02.015, <http://www.sciencedirect.com/science/article/pii/S0278434312000519>, 2012.
- Schaap, D. M. and Lowry, R. K.: SeaDataNet – Pan-European infrastructure for marine and ocean data management: unified access to distributed data sets, *International Journal of Digital Earth*, 3, 50–69, doi:10.1080/17538941003660974, <http://www.tandfonline.com/doi/abs/10.1080/17538941003660974>, 2010.
- 1070

- Sevault, F., Somot, S., Alias, A., Dubois, C., Lebeaupin-Brossier, C., Nabat, P., Adloff, F., Déqué, M., and Decharme, B.: A fully coupled Mediterranean regional climate system model: design and evaluation of the ocean component for the 1980–2012 period, *Tellus A*, 66, doi:10.3402/tellusa.v66.23967, <http://www.tellusa.net/index.php/tellusa/article/view/23967>, 2014.
- 1075 Somot, S., Sevault, F., and Déqué, M.: Transient climate change scenario simulation of the Mediterranean Sea for the twenty-first century using a high-resolution ocean circulation model, *Climate Dynamics*, 27, 851–879, doi:10.1007/s00382-006-0167-z, <http://link.springer.com/10.1007/s00382-006-0167-z>, 2006.
- 1080 Soto-Navarro, J., Somot, S., Sevault, F., Beuvier, J., Criado-Aldeanueva, F., García-Lafuente, J., and Béranger, K.: Evaluation of regional ocean circulation models for the Mediterranean Sea at the Strait of Gibraltar: volume transport and thermohaline properties of the outflow, *Climate Dynamics*, 44, 1277–1292, doi:10.1007/s00382-014-2179-4, <https://link.springer.com/article/10.1007/s00382-014-2179-4>, 2015.
- 1085 Spillman, C. M., Imberger, J., Hamilton, D. P., Hipsey, M. R., and Romero, J. R.: Modelling the effects of Po River discharge, internal nutrient cycling and hydrodynamics on biogeochemistry of the Northern Adriatic Sea, *Journal of Marine Systems*, 68, 167–200, doi:10.1016/j.jmarsys.2006.11.006, <http://www.sciencedirect.com/science/article/pii/S0924796306003459>, 2007.
- Takahashi, T., Broecker, W. S., and Langer, S.: Redfield ratio based on chemical data from isopycnal surfaces, *Journal of Geophysical Research: Oceans* (1978–2012), 90, 6907–6924, doi:10.1029/JC090iC04p06907, <http://onlinelibrary.wiley.com/doi/10.1029/JC090iC04p06907/abstract>, 1985.
- 1090 Taylor, K. E., Stouffer, R. J., and Meehl, G. A.: An Overview of CMIP5 and the Experiment Design, *Bulletin of the American Meteorological Society*, 93, 485–498, doi:10.1175/BAMS-D-11-00094.1, <http://journals.ametsoc.org/doi/abs/10.1175/BAMS-D-11-00094.1>, 2012.
- Theocharis, A., Nittis, K., Kontoyiannis, H., Papageorgiou, E., and Balopoulos, E.: Climatic changes in the Aegean Sea influence the eastern Mediterranean thermohaline circulation (1986–1997), *Geophysical Research Letters*, 26, 1617–1620, doi:10.1029/1999GL900320, <http://onlinelibrary.wiley.com/doi/10.1029/1999GL900320/abstract>, 1999.
- Vadsaria, T., Ramstein, G., Li, L., and Dutay, J.-C.: Sensibilité d’un modèle océan-atmosphère (LMDz-NEMOMED8) à un flux d’eau douce : cas du dernier épisode de sapropèle en mer Méditerranée, *Quaternaire*, 28, 2017.
- 1100 Velaoras, D. and Lascaratos, A.: North-Central Aegean Sea surface and intermediate water masses and their role in triggering the Eastern Mediterranean Transient, *Journal of Marine Systems*, 83, 58–66, doi:10.1016/j.jmarsys.2010.07.001, wOS:000282548300005, 2010.
- 1105 Yogeve, T., Rahav, E., Bar-Zeev, E., Man-Aharonovich, D., Stambler, N., Kress, N., Béjà, O., Mulholland, M. R., Herut, B., and Berman-Frank, I.: Is dinitrogen fixation significant in the Levantine Basin, East Mediterranean Sea?, *Environmental Microbiology*, 13, 854–871, doi:10.1111/j.1462-2920.2010.02402.x, <http://onlinelibrary.wiley.com/doi/10.1111/j.1462-2920.2010.02402.x/abstract>, 2011.

| Name    | Dynamics (NEMO years) | Buffer zone concentrations | River inputs |
|---------|-----------------------|----------------------------|--------------|
| CTRL    | 1966–1981             | 1966–1981                  | 1966–1981    |
| CTRL_R  | 1966–1981             | 1966–1981                  | 1980–2099    |
| CTRL_RG | 1966–1981             | 1980–2099                  | 1980–2099    |
| HIS/A2  | 1980–2099             | 1980–2099                  | 1980–2099    |

**Table 1.** Description of the simulations. The years indicate the forcing years throughout the 120 years of simulation. The cycles are repeated in the CTRL simulations.

| Simulation | Period    | Whole Med. | Western    | Eastern     | Ionian-Levantine | Adriatic   | Aegean      | Atlantic buffer zone |
|------------|-----------|------------|------------|-------------|------------------|------------|-------------|----------------------|
| HIS/A2     | 1980–1999 | 551        | 241        | 310         | 305              | 1.5        | 4.0         | 535                  |
|            | 2030–2049 | 570 (+3.4) | 240 (0)    | 329 (+6.1)  | 324 (+6.2)       | 1.4 (0)    | 3.6 (-10)   | 543 (+1.5)           |
|            | 2080–2099 | 598 (+8.5) | 251 (+4.1) | 346 (+11.6) | 341 (+11.8)      | 1.5 (0)    | 3.5 (-12.5) | 562 (+5.0)           |
| CTRL       | 1980–1999 | 545        | 238        | 307         | 302              | 1.6        | 4.0         | 532                  |
|            | 2030–2049 | 553 (+1.5) | 238 (0)    | 314 (+2.3)  | 309 (+2.3)       | 1.6 (0)    | 4.2 (+5.0)  | 532 (0)              |
|            | 2080–2099 | 560 (+2.6) | 241 (+1.3) | 319 (+3.9)  | 313 (+3.6)       | 1.7 (+6.3) | 4.2 (+5.0)  | 532 (0)              |
| CTRL_R     | 1980–1999 | 547        | 239        | 309         | 303              | 1.5        | 4.2         | 534                  |
|            | 2030–2049 | 536 (-2.0) | 232 (-2.9) | 304 (-1.6)  | 299 (-1.3)       | 1.4 (-6.7) | 3.5 (-17)   | 534 (0)              |
|            | 2080–2099 | 538 (-1.6) | 230 (-3.8) | 309 (0)     | 303 (0)          | 1.5 (0)    | 3.7 (-12)   | 534 (0)              |
| CTRL_RG    | 1980–1999 | 548        | 239        | 309         | 303              | 1.5        | 4.2         | 535                  |
|            | 2030–2049 | 536 (-2.2) | 233 (-2.5) | 303 (-1.9)  | 298 (-1.7)       | 1.4 (-6.7) | 3.5 (-17)   | 544 (+1.7)           |
|            | 2080–2099 | 540 (-1.5) | 235 (-1.7) | 306 (-1.0)  | 301 (-0.7)       | 1.4 (-6.7) | 3.6 (-14)   | 562 (+5.0)           |

**Table 2.** Simulated integrated phosphate content ( $10^9$  mol) over 20 years periods in the Mediterranean sub-basins in the different simulations. Basins are the same as defined in Fig.2 of Adloff et al. (2015), with the eastern basin including the Ionian, Levantine, Adriatic and Aegean subbasins. Values in parenthesis indicate the percentage difference from the 1980–1999 period.



| Simulation | Period    | Whole Med.   | Western     | Eastern     | Ionian-Levantine | Adriatic    | Aegean     | Atlantic buffer zo |
|------------|-----------|--------------|-------------|-------------|------------------|-------------|------------|--------------------|
| HIS/A2     | 1980–1999 | 13400        | 5520        | 7890        | 7690             | 66.9        | 132        | 8091               |
|            | 2030–2049 | 13800 (+3.0) | 5450 (-1.3) | 8350 (+5.8) | 8100 (+5.3)      | 88.5 (+32)  | 163 (+23)  | 8230 (+1.7)        |
|            | 2080–2099 | 14700 (+9.7) | 5750 (+4.2) | 8920 (+13)  | 8650 (+12)       | 98.3 (+47)  | 164 (+24)  | 8510 (+5.2)        |
| CTRL       | 1980–1999 | 13500        | 5530        | 7970        | 7760             | 66.2        | 144        | 8050               |
|            | 2030–2049 | 12900 (-4.4) | 5320 (-3.8) | 7610 (-4.5) | 7420 (-4.4)      | 61.7 (-6.8) | 131 (-9.0) | 8050 (0)           |
|            | 2080-2099 | 12500 (-7.4) | 5170 (-6.5) | 7330 (-8.0) | 7150 (-7.9)      | 58.7 (-11)  | 123 (-15)  | 8050 (0)           |
| CTRL_R     | 1980–1999 | 13300        | 5470        | 7870        | 7760             | 66.8        | 138        | 8070               |
|            | 2030-2049 | 13300 (0)    | 5250 (-4.0) | 8020 (+1.9) | 7770 (+0.1)      | 88.0 (+32)  | 162 (+17)  | 8070 (0)           |
|            | 2080-2099 | 13700 (+3.0) | 5300 (-3.1) | 8440 (+7.2) | 8170 (+5.3)      | 94.2 (+41)  | 177 (+28)  | 8080 (+0.1)        |
| CTRL_RG    | 1980–1999 | 13300        | 5480        | 7870        | 7760             | 66.8        | 138        | 8090               |
|            | 2030–2049 | 13300 (0)    | 5270 (-3.8) | 8010 (+1.8) | 7760 (0)         | 88.0 (+32)  | 162 (+17)  | 8080 (-0.1)        |
|            | 2080–2099 | 13800 (+3.8) | 5390 (-1.6) | 8430 (+7.1) | 8160 (+5.2)      | 94.3 (+41)  | 177 (+28)  | 8080 (-0.1)        |

**Table 3.** Simulated integrated nitrate content ( $10^9$  mol) over 20 years periods in the Mediterranean sub-basins in the different simulations. Basins are the same as defined in Fig.2 of Adloff et al. (2015), with the eastern basin including the Ionian, Levantine, Adriatic and Aegean subbasins. Values in parenthesis indicate the percentage difference from the 1980–1999 period.

| Simulation | Period    | Whole Med.   | Western      | Eastern      | Ionian-Levantine | Adriatic   | Aegean      | Atlantic buffer |
|------------|-----------|--------------|--------------|--------------|------------------|------------|-------------|-----------------|
| HIS/A2     | 1980–1999 | 25700        | 9680         | 16000        | 13500            | 830        | 1720        | 3210            |
|            | 2030–2049 | 23800 (-7.4) | 8980 (-7.2)  | 14800 (-7.5) | 12700 (-5.9)     | 720 (-13)  | 1440 (-16)  | 3280 (+2.2)     |
|            | 2080–2099 | 23400 (-8.9) | 9180 (-5.1)  | 14300 (-11)  | 12200 (-9.6)     | 690 (-17)  | 1390 (-19)  | 3570 (+11)      |
| CTRL       | 1980–1999 | 27000        | 10200        | 16700        | 14200            | 880        | 1670        | 3180            |
|            | 2030–2049 | 27000 (0)    | 10200 (0)    | 16900 (+1.2) | 14300 (+0.7)     | 890 (+1.1) | 1710 (+2.4) | 3180 (0)        |
|            | 2080-2099 | 26600 (-1.5) | 9980 (-2.2)  | 16600 (-0.1) | 14000 (-1.4)     | 880 (0)    | 1690 (+1.2) | 3180 (0)        |
| CTRL_R     | 1980–1999 | 27000        | 10300        | 16700        | 14100            | 875        | 1720        | 3210            |
|            | 2030-2049 | 26800 (-0.7) | 10100 (-1.9) | 16700 (0)    | 14300 (+1.4)     | 780 (-12)  | 1610 (-6.4) | 3210 (0)        |
|            | 2080-2099 | 26400 (-2.2) | 9940 (-3.5)  | 16500 (-1.2) | 14100 (0)        | 760 (-13)  | 1600 (-7.0) | 3220 (0.3)      |
| CTRL_RG    | 1980–1999 | 27000        | 10300        | 16700        | 14100            | 875        | 1720        | 3230            |
|            | 2030–2049 | 26900 (-0.4) | 10200 (-1.0) | 16700 (0)    | 14300 (+1.4)     | 780 (-12)  | 1600 (-7.0) | 3260 (+0.9)     |
|            | 2080–2099 | 26700 (-1.1) | 10200 (-1.0) | 16500 (-1.2) | 14100 (0)        | 750 (-14)  | 1600 (-7.0) | 3420 (+5.9)     |

**Table 4.** Simulated integrated chlorophyll production ( $10^9$  mol) over 20 years periods in the Mediterranean sub-basins in the different simulations. Basins are the same as defined in Fig.2 of Adloff et al. (2015), with the eastern basin including the Ionian, Levantine, Adriatic and Aegean subbasins. Values in parenthesis indicate the percentage difference from the 1980–1999 period.

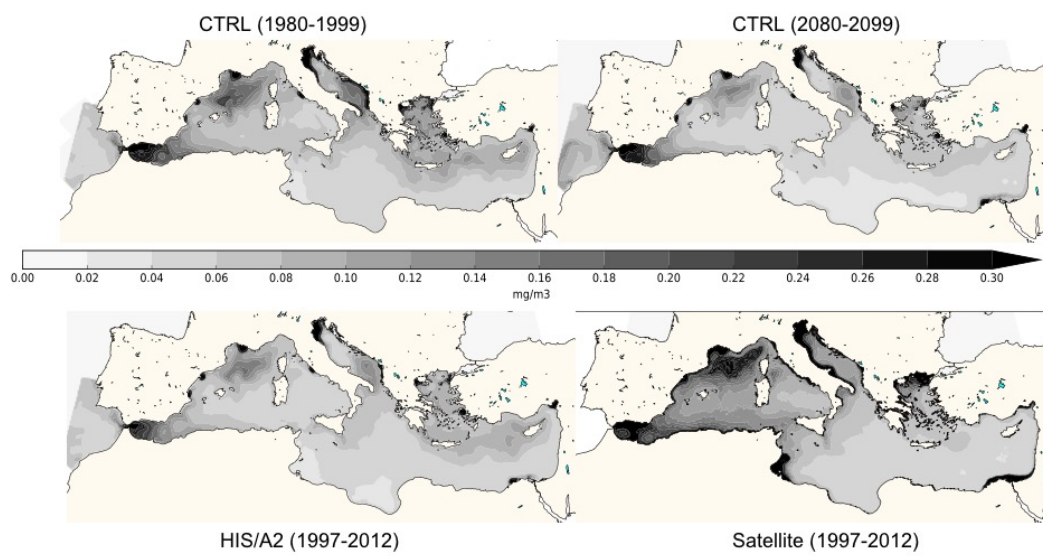

**Figure 1.** Average surface chlorophyll concentration from the CTRL (top, left: 1980–1999 right: 2080–2099) and HIS/A2 (bottom left) simulations, and from satellite estimations (MyOcean Dataset 1997–2012, bottom right).

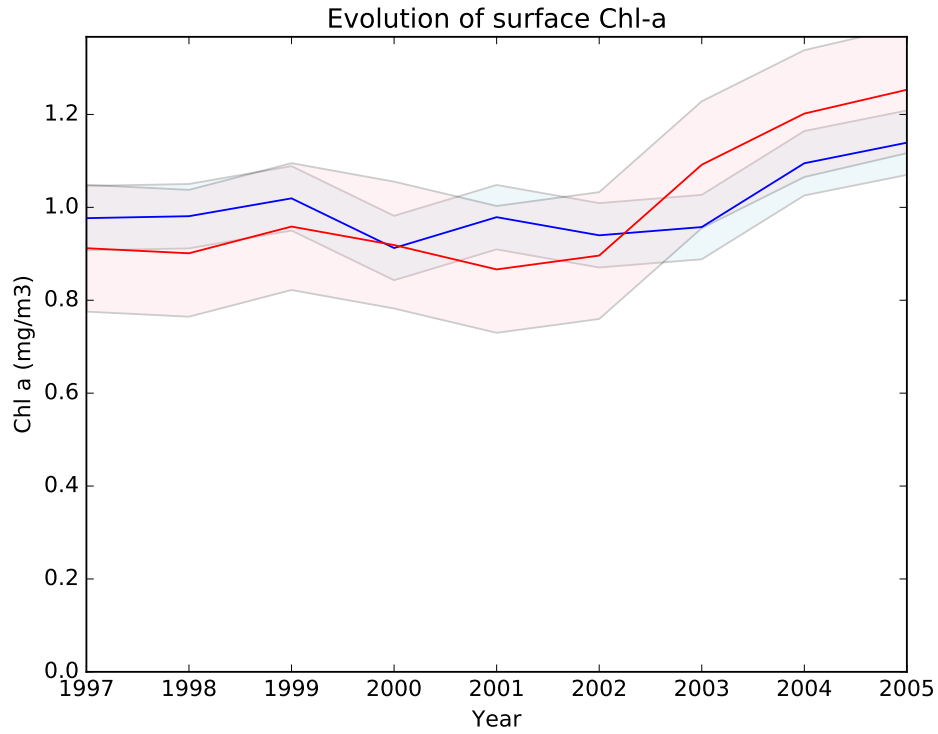

**Figure 2.** Average surface chlorophyll concentration from the HIS/A2 simulation in blue and from the SeaWiFS satellite data (Bosc et al., 2004) in red over the period 1997–2005. Shaded colors represent the standard deviations. Values are normalized by dividing by the average chlorophyll concentration over the period.

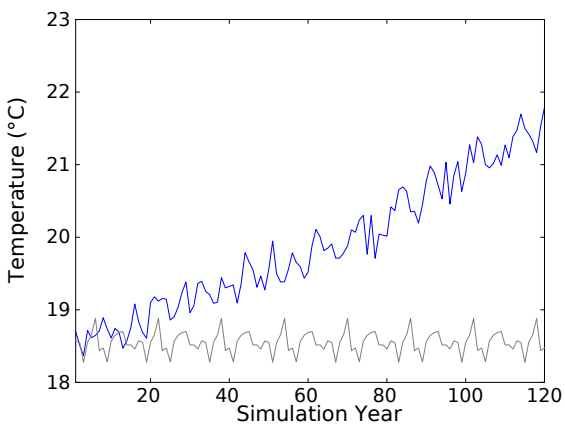

(a) Average Mediterranean SST

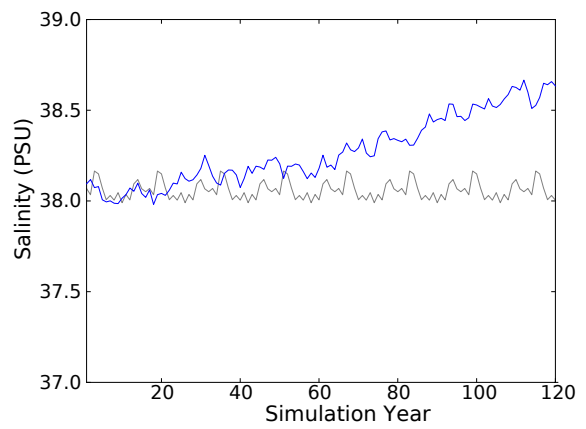

(b) Average Mediterranean SSS

**Figure 3.** Evolution of average Mediterranean SST (left) and SSS (right) in CTRL (grey line) and HIS/A2 (blue line) simulations.

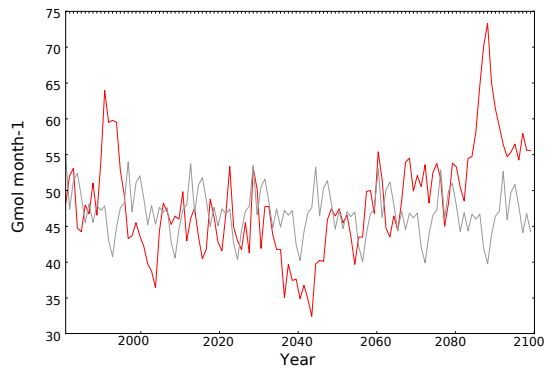

(a) Total incoming nitrate

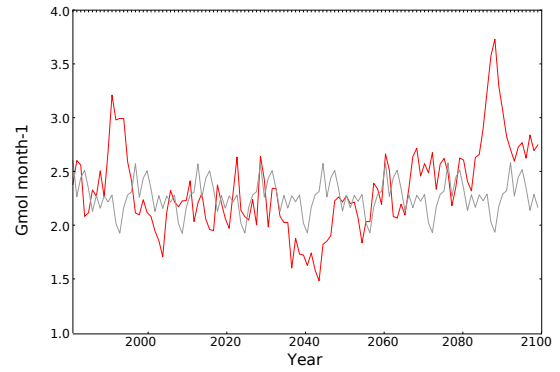

(b) Total incoming phosphate

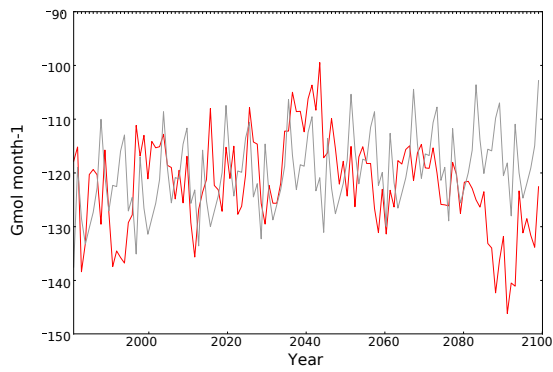

(c) Total outgoing nitrate

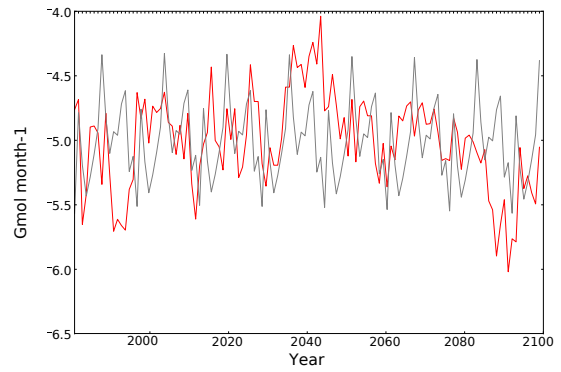

(d) Total outgoing phosphate

**Figure 4.** Evolution of total incoming (top) and outgoing (bottom) fluxes of nitrate and phosphate ( $10^9 \text{ mol month}^{-1}$ ) through the Strait of Gibraltar in CTRL (grey line) and HIS/A2 (red line). Negative values indicate outgoing fluxes of nutrients.

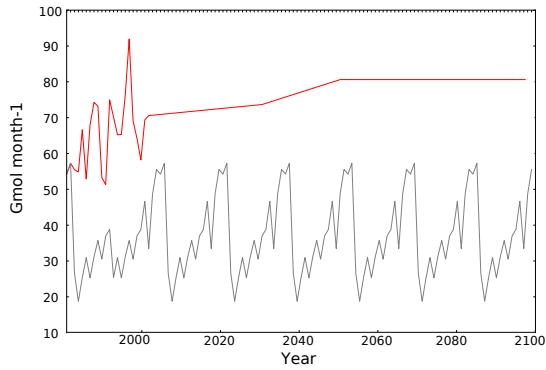

(a) Total river discharge of nitrate

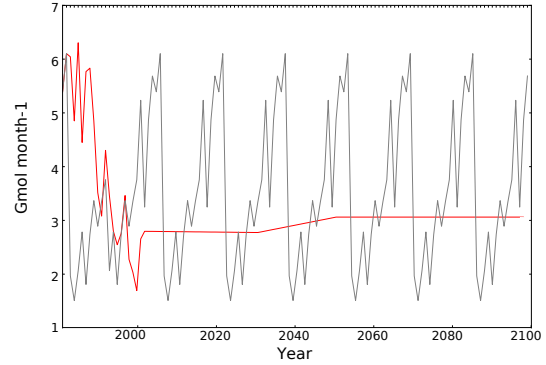

(b) Total river discharge of phosphate

**Figure 5.** Evolution of total river discharge fluxes of nitrate and phosphate ( $10^9 \text{mol month}^{-1}$ ) to the Mediterranean Sea in CTRL (grey line) and HIS/A2 (red line).

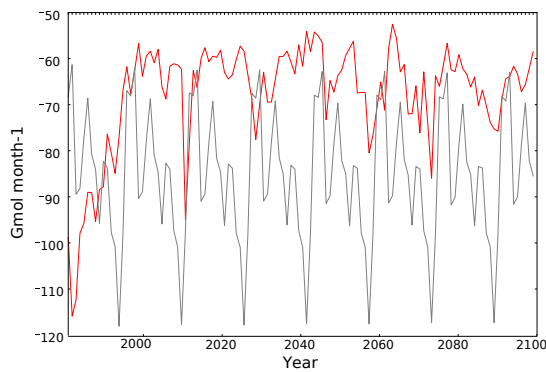

(a) Total nitrogen sedimentation

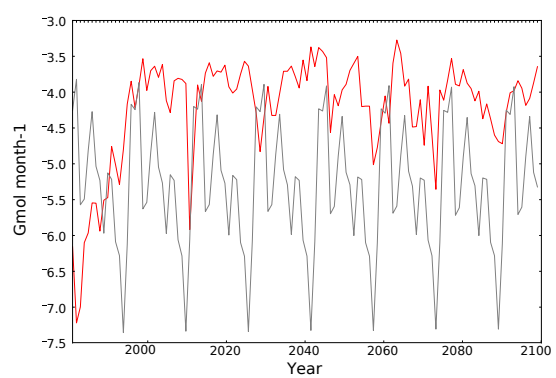

(b) Total phosphorus sedimentation

**Figure 6.** Evolution of total sedimentation fluxes of N and P ( $10^9 \text{mol month}^{-1}$ ) in the Mediterranean Sea in CTRL (grey line) and HIS/A2 (red line). Negative fluxes indicate that the nutrients are exiting the Mediterranean waters.

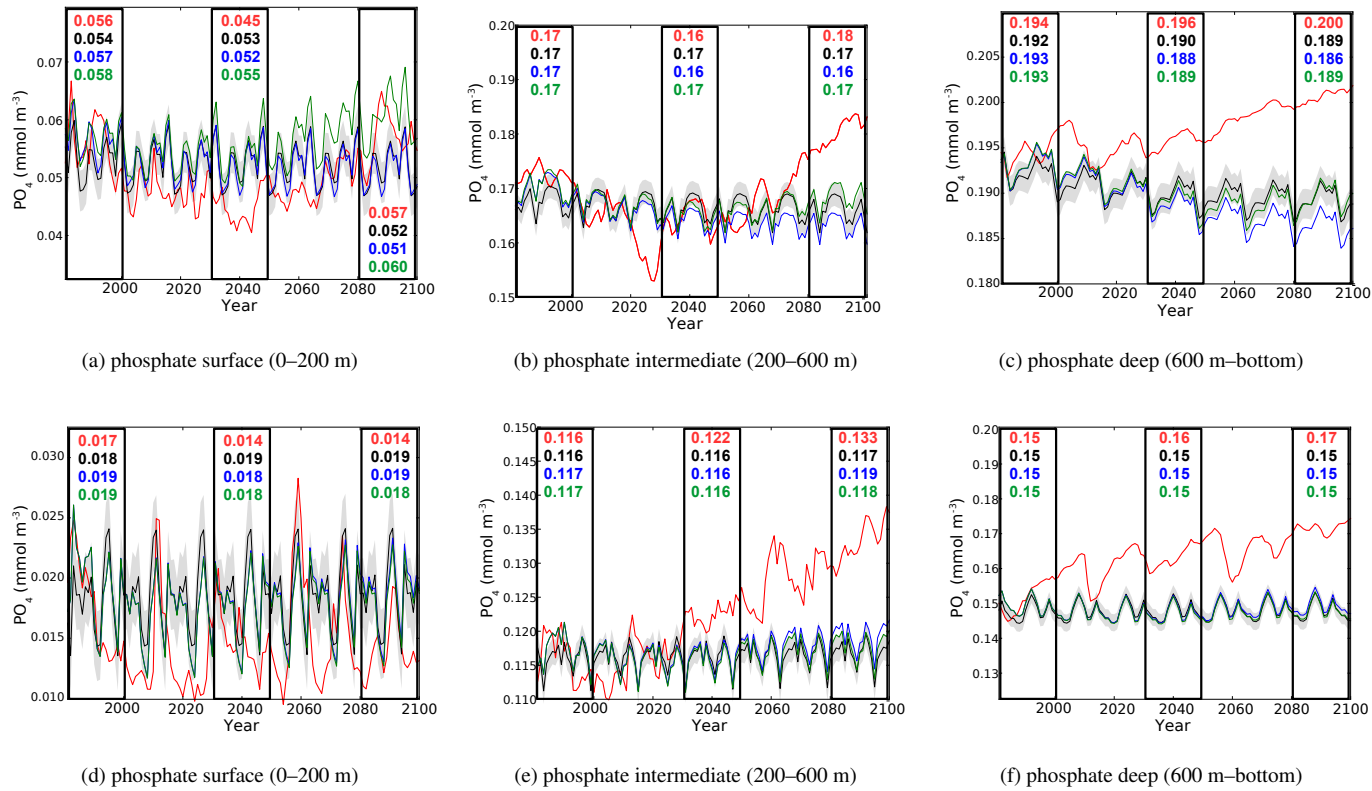

**Figure 7.** Evolution of yearly average phosphate concentration ( $10^{-3} \text{ mol m}^{-3}$ ) in the surface (left), intermediate (middle) and bottom (right) layers in the western (top) and eastern (bottom) basin. Red lines represent the HIS/A2 simulation, black lines represent the CTRL (with standard deviation), blue and green lines represent the CTRL\_R and CTRL\_RG simulations respectively. Colored numbers in the shaded areas represent the average concentrations in the corresponding simulations for the shaded time periods.

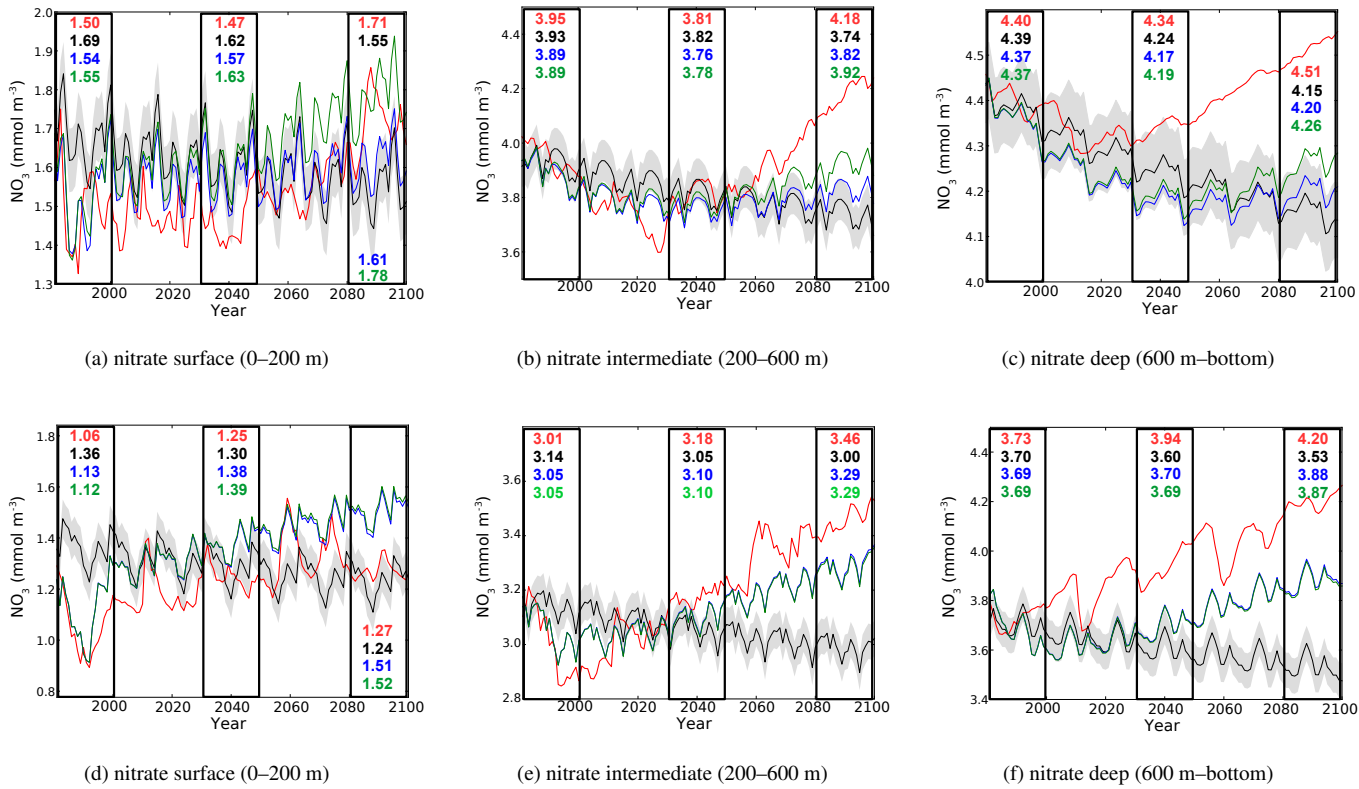

**Figure 8.** Evolution of yearly average nitrate concentration ( $10^{-3} \text{mol m}^{-3}$ ) in the surface (left), intermediate (middle) and bottom (right) layers in the western (top) and eastern (bottom) basins. Red lines represent the HIS/A2 simulation, black lines represent the CTRL (with standard deviation), blue and green lines represent the CTRL\_R and CTRL\_RG simulations respectively. Colored numbers in the shaded areas represent the average concentrations in the corresponding simulations for the shaded time periods.

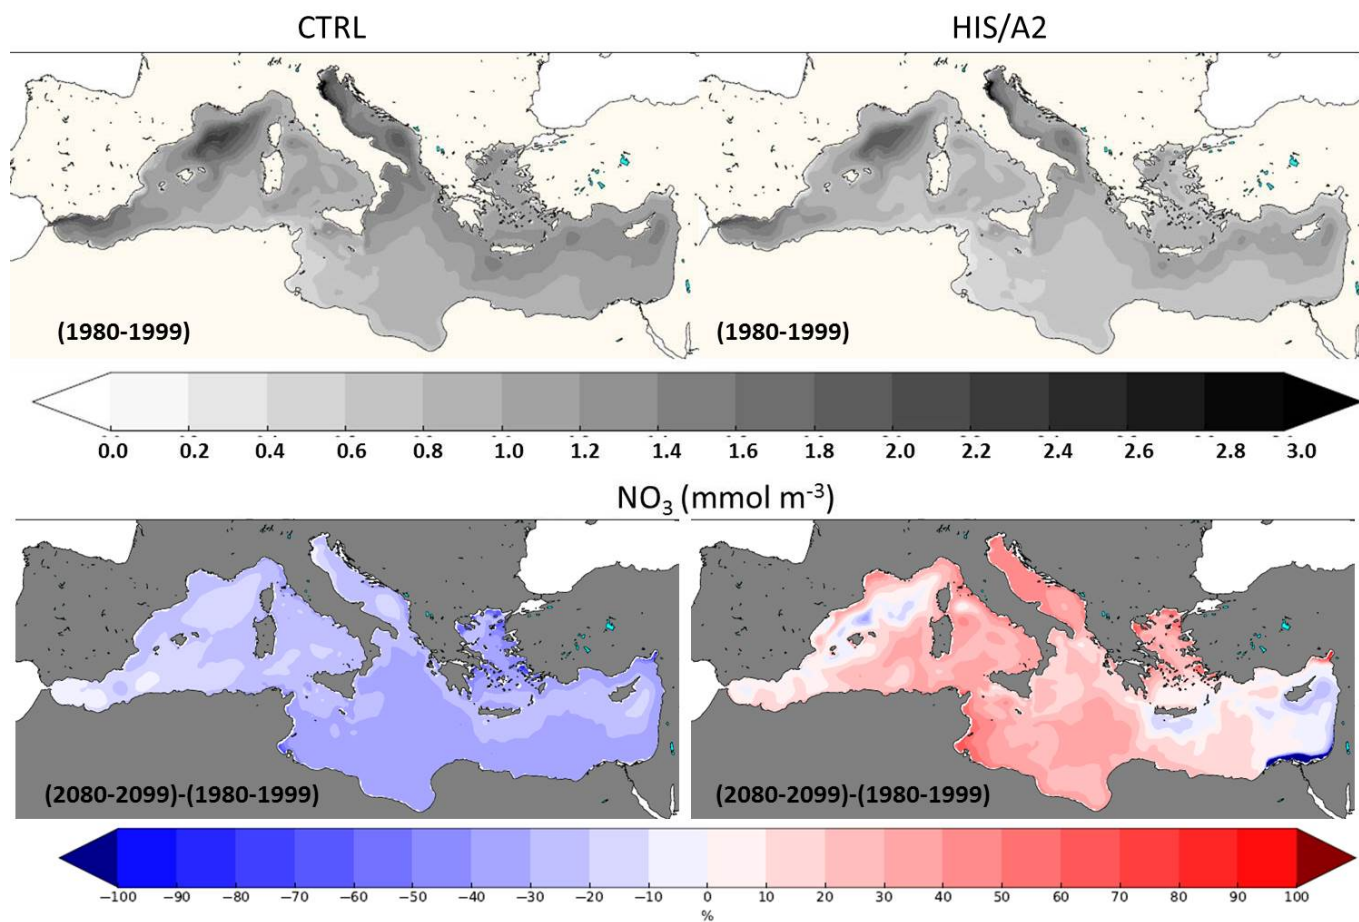

**Figure 9.** Present (1980–1999, top) interannual average surface (0–200 m) concentrations of nitrate ( $10^{-3} \text{mol m}^{-3}$ ) in the CTRL (left) HIS/A2 (right) simulations. The bottom maps show the relative difference (in %) between the 2080–2099 and the 1980–1999 periods in CTRL (left) and HIS/A2 (right).



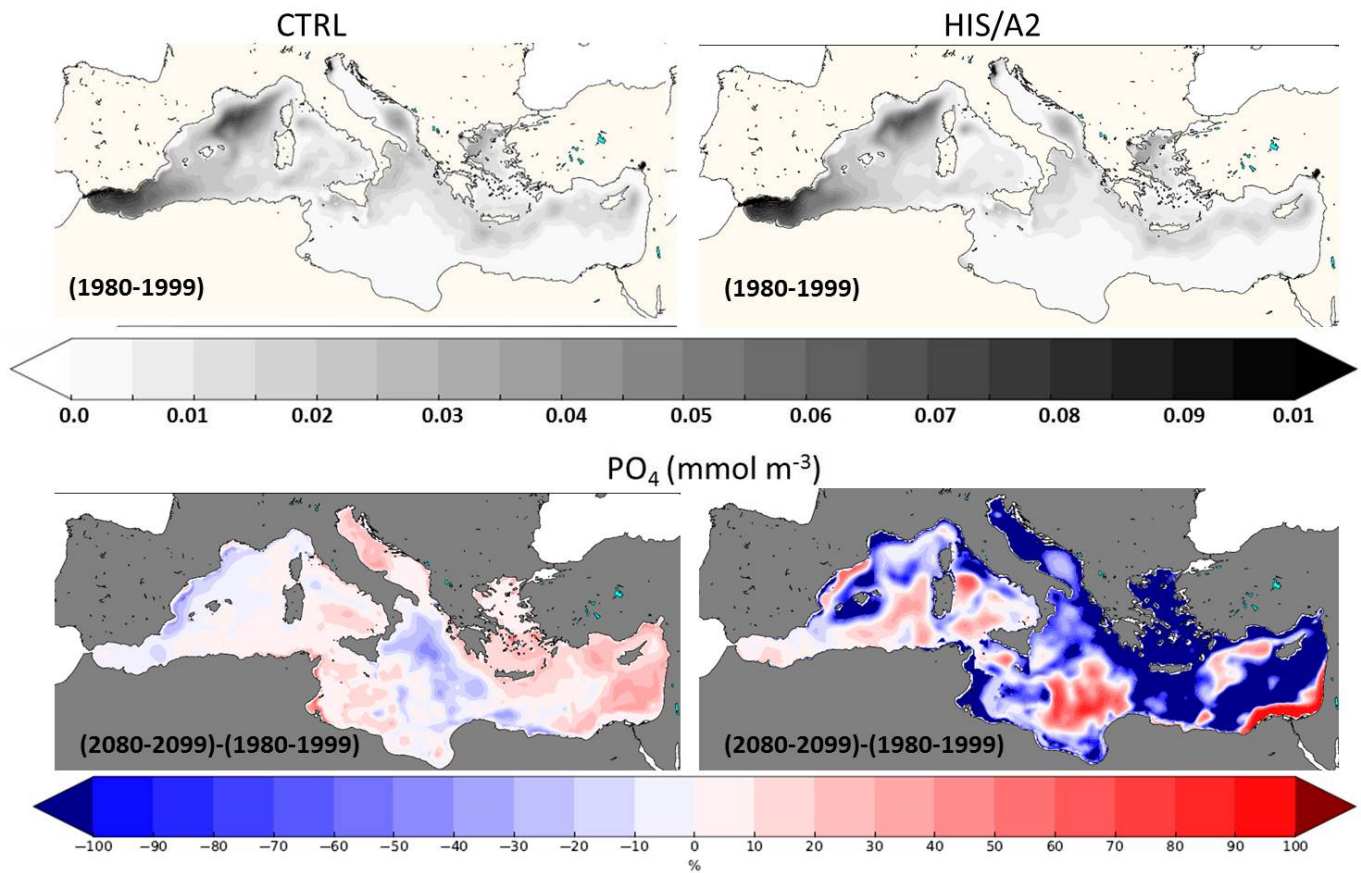

**Figure 10.** Present (1980–1999, top) interannual average surface (0–200m) concentrations of phosphate ( $10^{-3}\text{mol m}^{-3}$ ) in the CTRL (left) and HIS/A2 (right) simulations. The bottom maps show the relative difference (in %) in primary production between the 2080–2099 and the 1980–1999 periods in CTRL (left) and HIS/A2 (right).

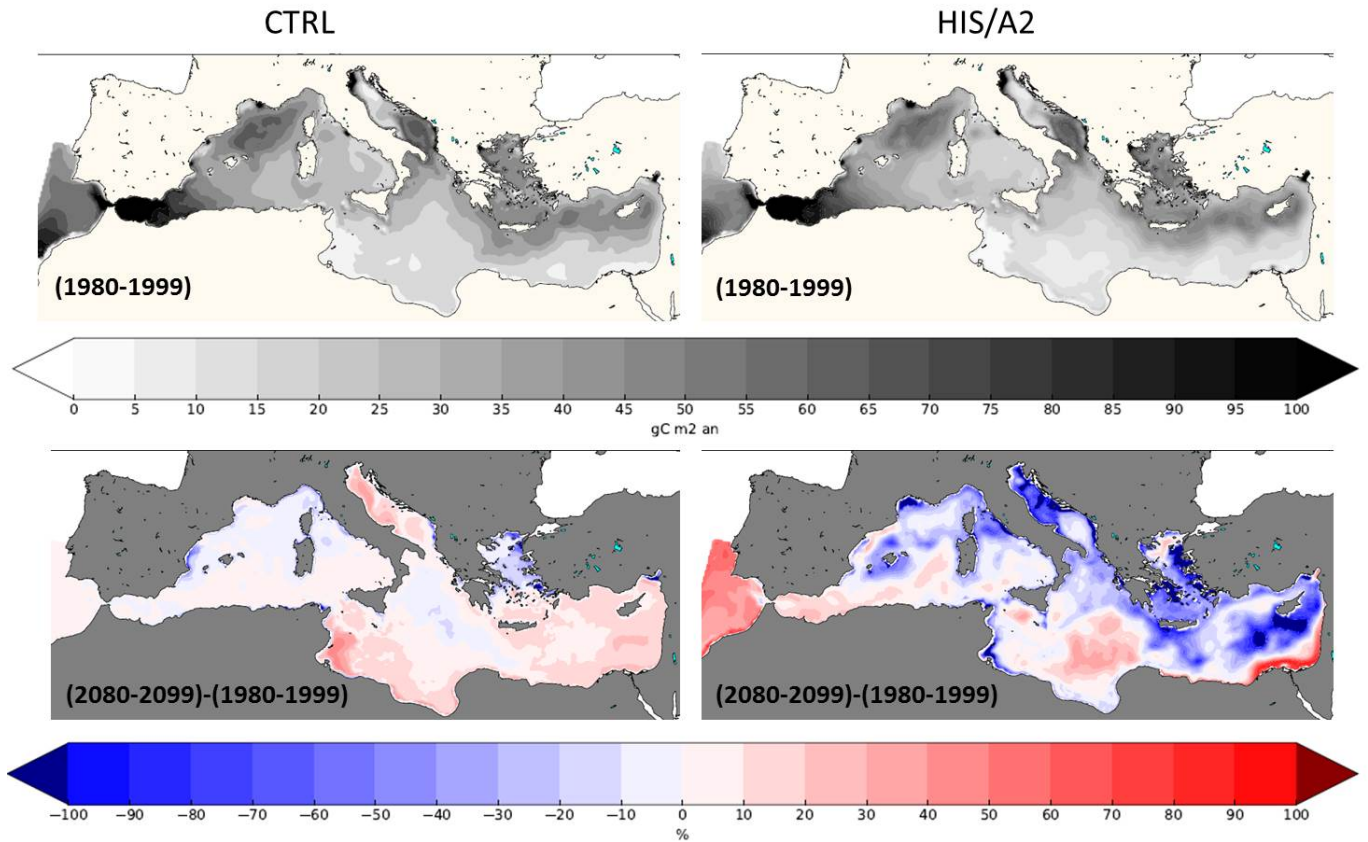

**Figure 11.** Present (1980–1999, top) interannual average surface (0–200 m) integrated primary production ( $\text{gC m}^{-2}$ ) in the CTRL (left) and HIS/A2 (right) simulations. The bottom maps show the relative difference (in %) in primary production between the 2080–2099 and the 1980–1999 periods in CTRL (left) and HIS/A2 (right).

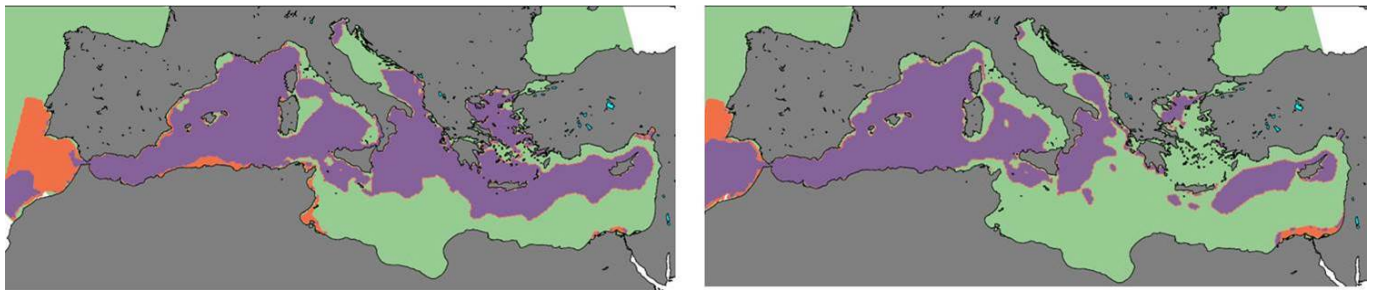

**Figure 12.** Present (1980–1999) and future (2080–2099) interannual average surface (0–200 m) limiting nutrient in the HIS/A2 simulation. N and P colimitation is considered when limitation factors for N and P differ by less than 1 %. Green zones are P-limited, Orange zones are N-limited and purple zones are N and P co-limited.

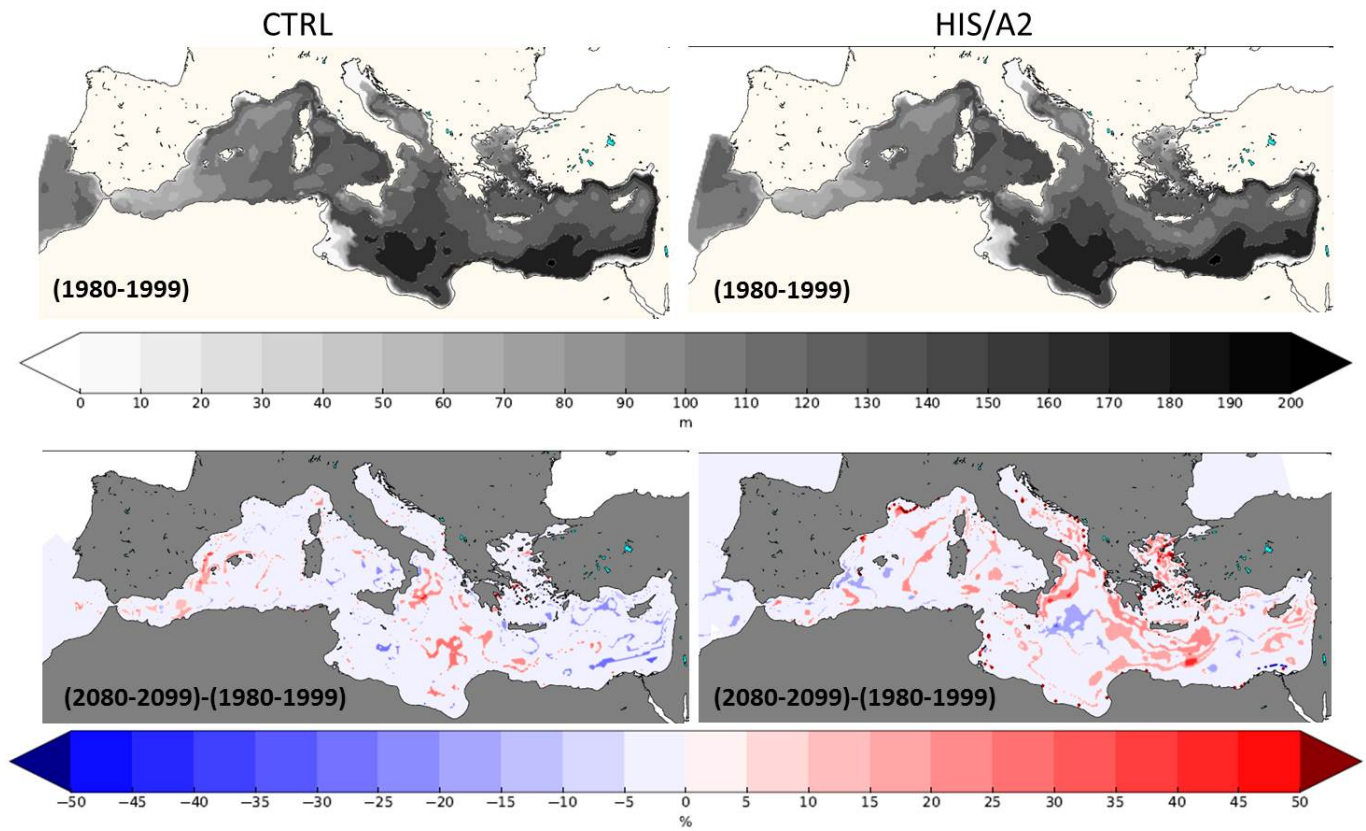

**Figure 13.** Present (1980–1999, top) interannual average DCM (m) in the CTRL (left) and HIS/A2 (right) simulations. The bottom maps show the relative difference (in %) in DCM between the 2080–2099 and the 1980–1999 periods in CTRL (left) and HIS/A2 (right).

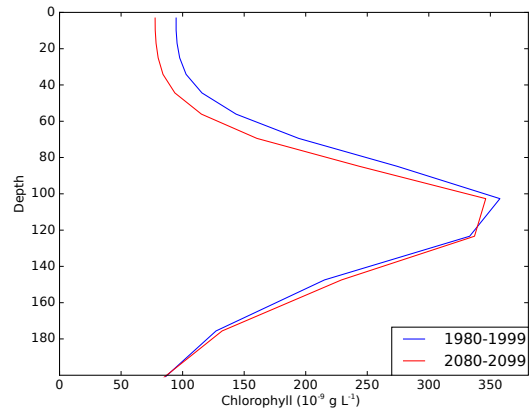

(a) DYFAMED

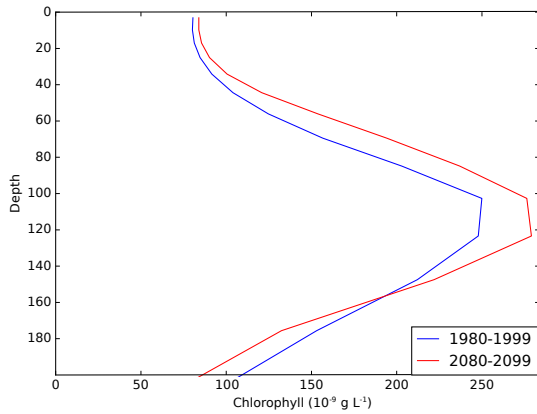

(b) Western basin

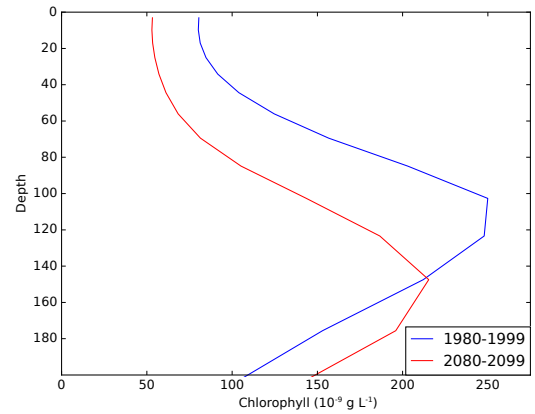

(c) Eastern basin

**Figure 14.** Present (1980–1999) and future (2080–2099) interannual average vertical profiles of total chlorophyll *a* ( $10e^{-9} \text{g L}^{-1}$ ) at the DYFAMED station and averaged profiles over the western and eastern (including Aegean and Adriatic) basins.

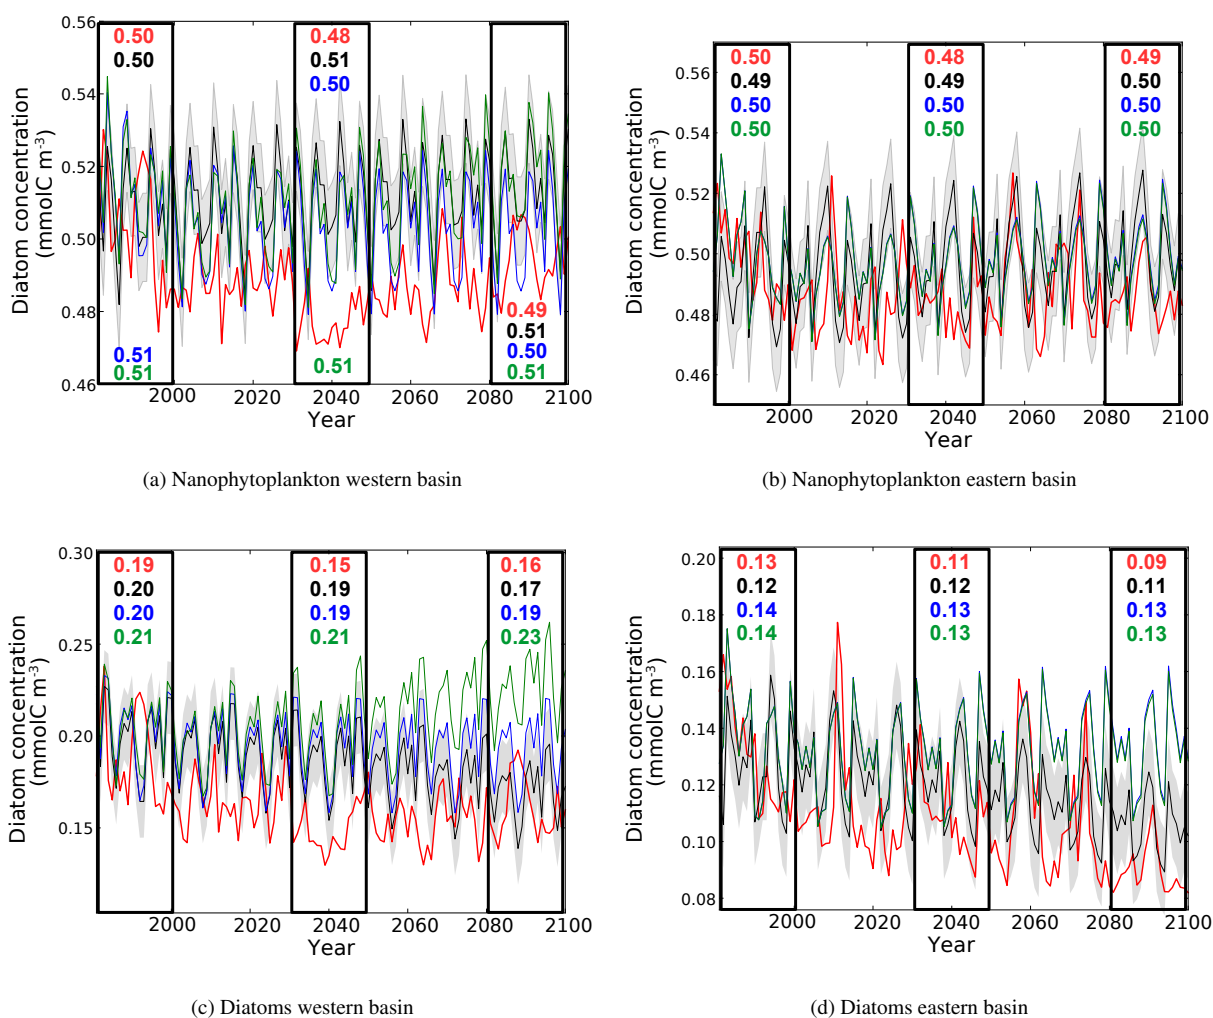

**Figure 15.** Evolution of yearly average nanophytoplankton and diatoms concentration ( $10^{-3}\text{mol m}^{-3}$ ) in the surface layer of the western and eastern basin. Red line represent the HIS/A2 simulation, black lines represent the CTRL (with standard deviation), blue and green lines represent the CTRL\_R and CTRL\_RG simulations respectively. Colored numbers in the shaded areas represent the average concentrations in the corresponding simulations for the shaded time periods.



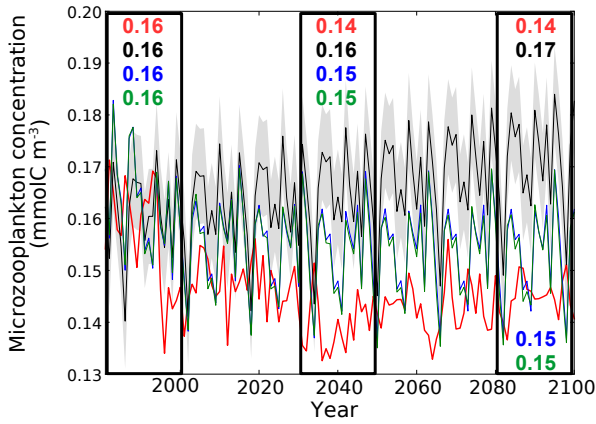

(a) Microzooplankton western basin

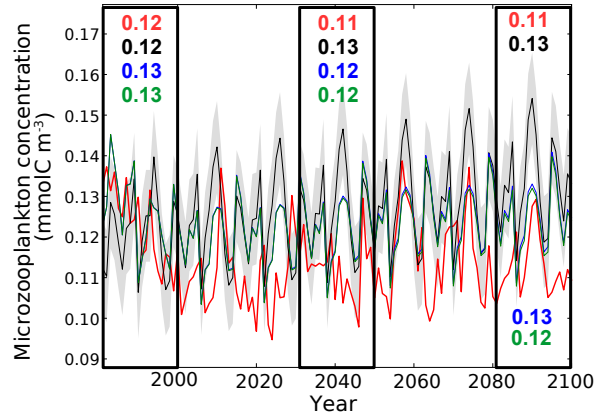

(b) Microzooplankton eastern basin

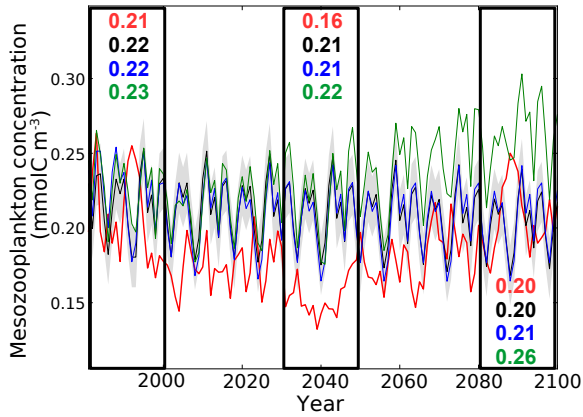

(c) Mesozooplankton western basin

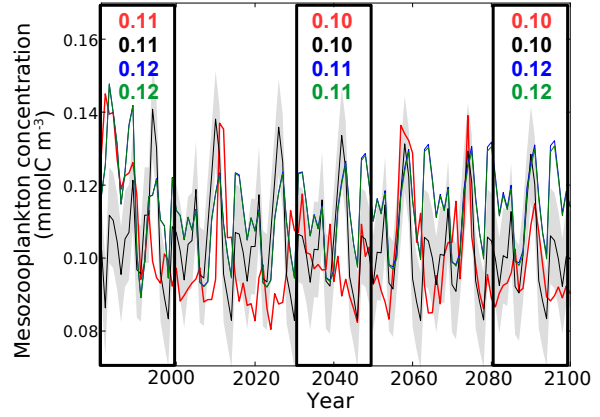

(d) Mesozooplankton eastern basin

**Figure 16.** Evolution of yearly average microzooplankton and mesozooplankton concentrations ( $10^{-3}\text{mol m}^{-3}$ ) in the surface layer of the western and eastern basins. Red lines represent the HIS/A2 simulation, black lines represent the CTRL (with standard deviation), blue and green lines represent the CTRL\_R and CTRL\_RG simulations respectively. Colored numbers in the shaded areas represent the average concentrations in the corresponding simulations for the shaded time periods.

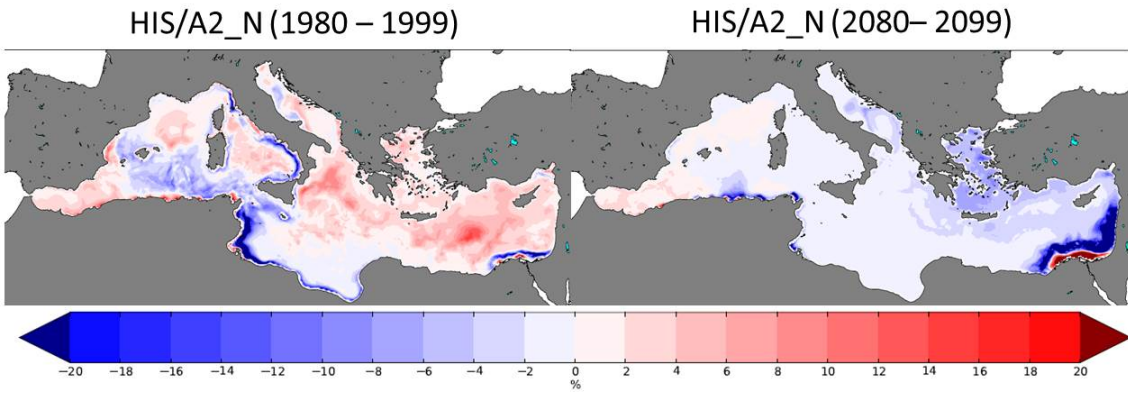

(a) Relative effects of total nitrogen deposition

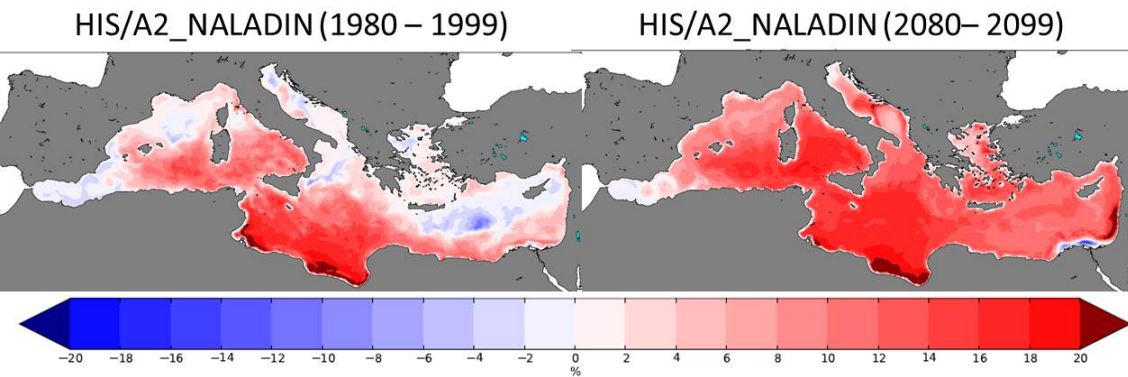

(b) Relative effects of natural dust deposition

**Figure 17.** Present (1980–1999) and future (2080–2099) relative effects of total nitrogen (top) and natural dust (bottom) deposition on surface (0–10 m) total primary production.

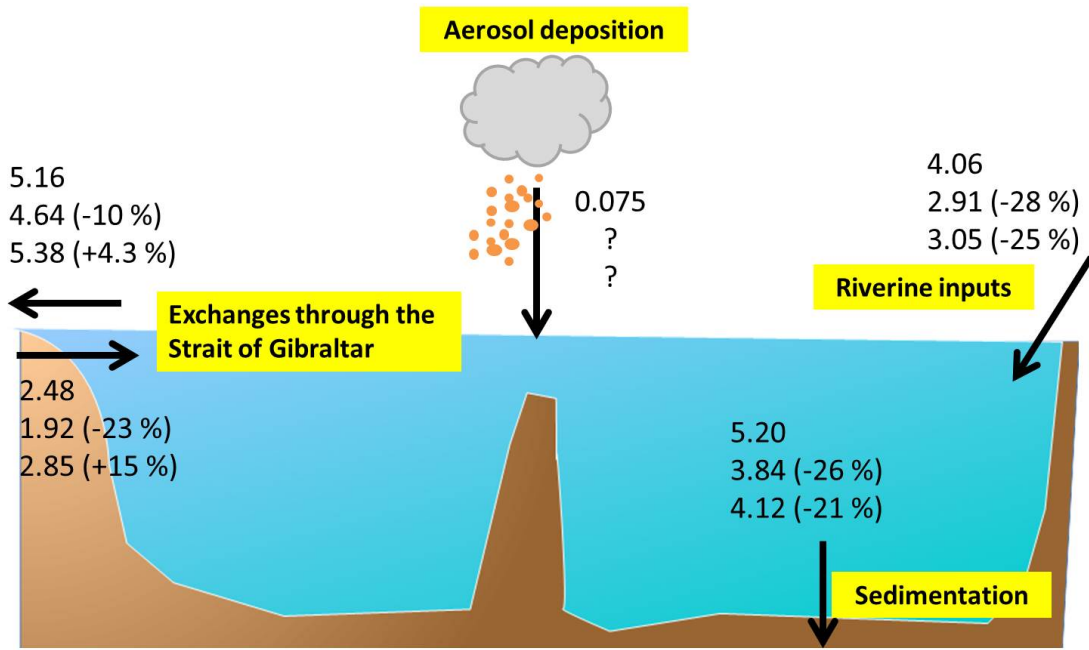

(a) Phosphate fluxes

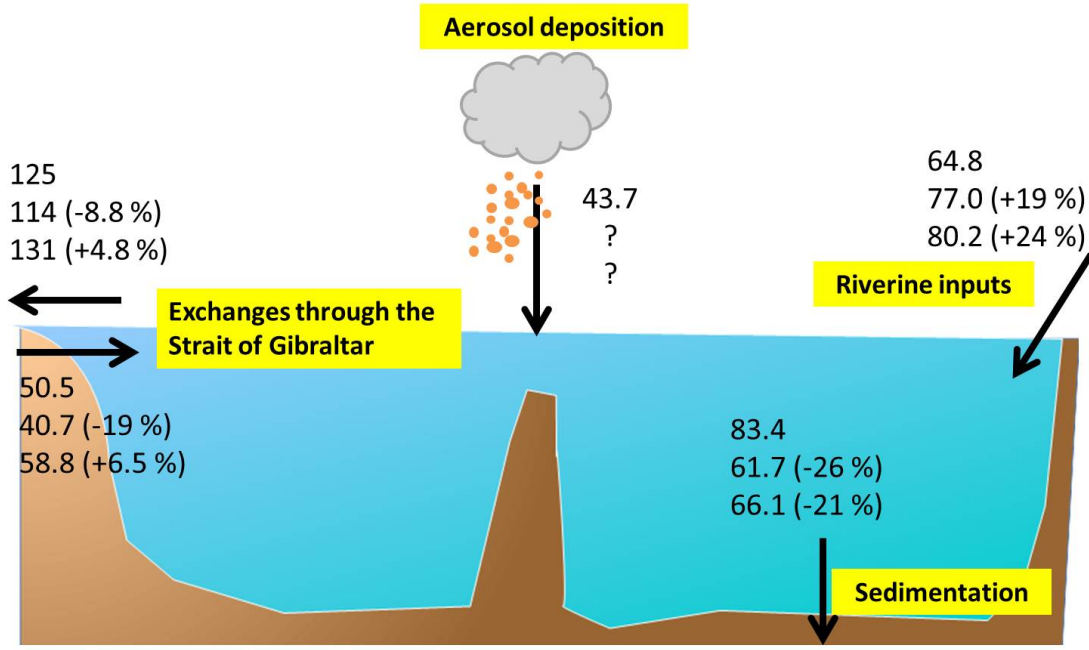

(b) Nitrate fluxes

**Figure 18.** Schematic diagrams illustrating the Mediterranean budgets of phosphate and nitrate. For each component, the 3 lines represent the average fluxes (in Gmol year<sup>-1</sup>) over the periods 1980–1999, 2030–2049 and 2080–2099, numbers in parenthesis indicate the percentage difference from the 1980–1999 values.



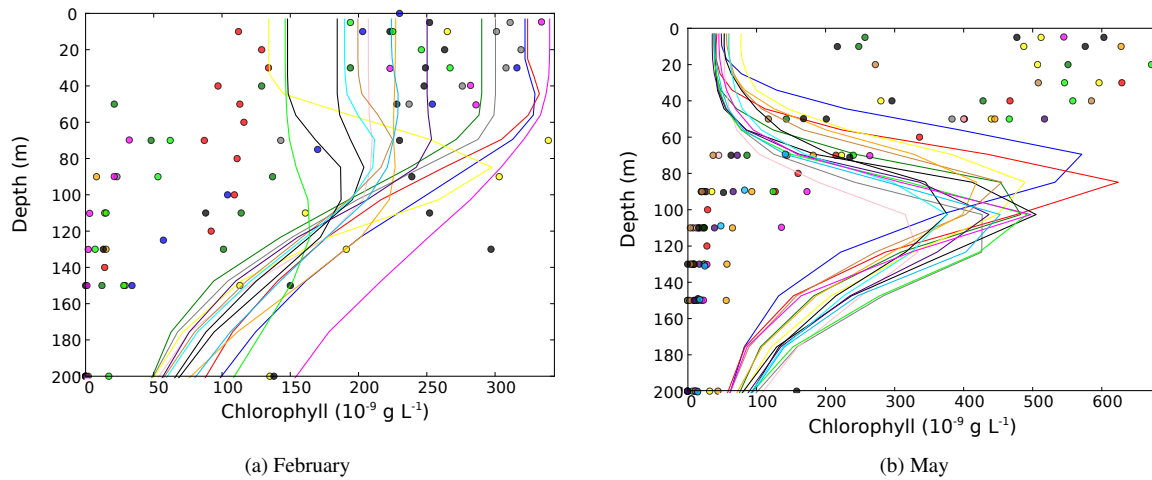

**Figure A1.** Average chlorophyll-a profiles in February (left) and May (right) for the years 1991 to 2005 at the DYFAMED station in the Ligurian Sea Sea (43.4277°N, 7.2522°E). Dots represent data points (Marty et al., 2002; Faugeras et al., 2003). Lines represent the HIS/A2 simulation. Colors represent individual years.

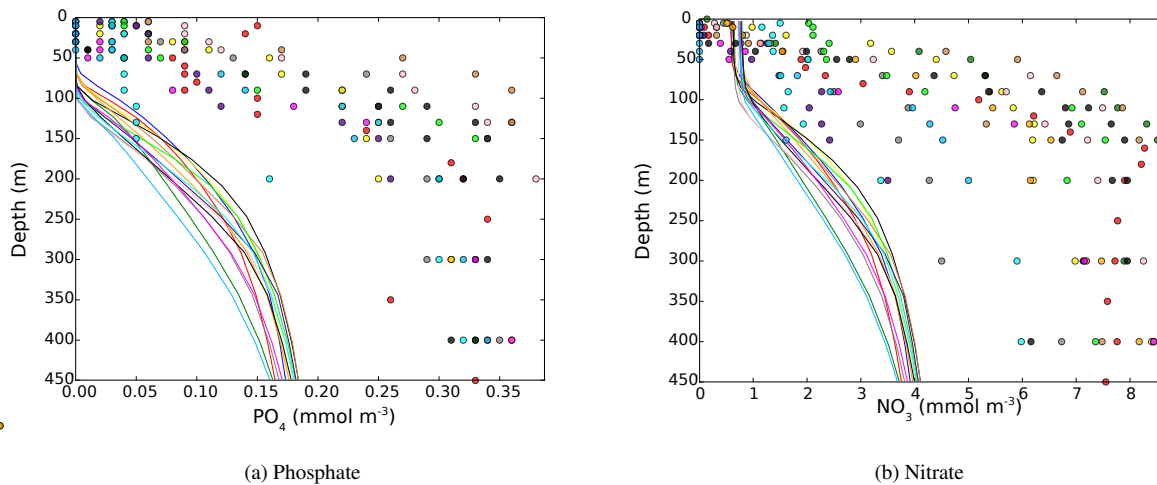

**Figure A2.** Average phosphate (left) and nitrate (right) profiles in May for the years 1991 to 2005 at the DYFAMED station in the Ligurian Sea Sea (43.4277°N, 7.2522°E). Dots represent data points (Marty et al., 2002; Faugeras et al., 2003). Lines represent the HIS/A2 simulation. Colors represent individual years.

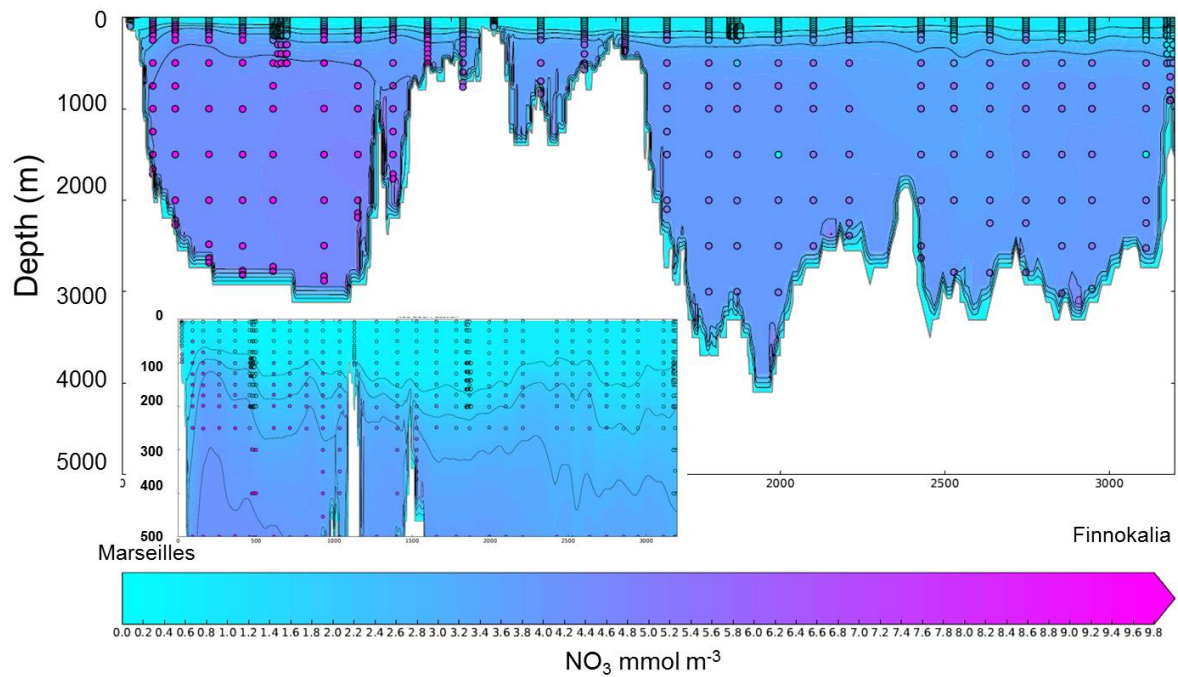

(a) nitrate concentration

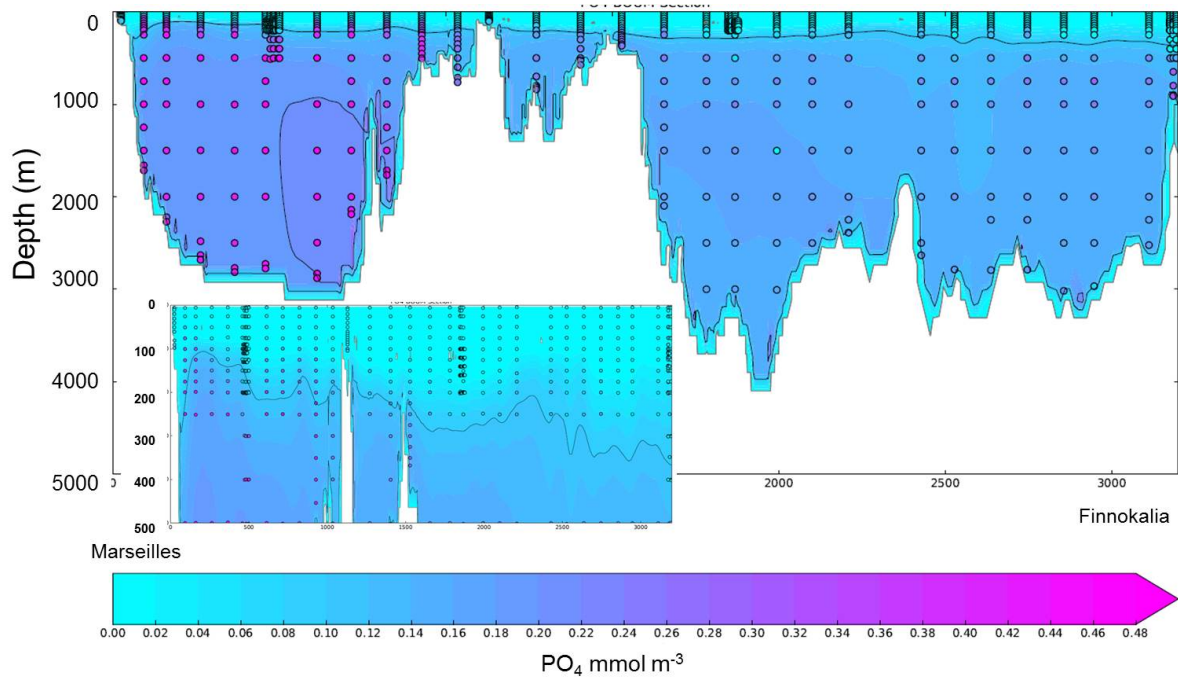

(b) PO<sub>4</sub> concentration

**Figure A3.** Average concentrations of nitrate (top) and phosphate (bottom) for the 20 first years of the control simulation (CTRL). The dots represent data along a transect from Marseille to Finnokalia from the BOUM campaign (distances in km Moutin et al., 2012). The framed areas represent a vertical zoom of the top 500 m along the whole transect.
